# Supplementary material for: The genus Borrelia reloaded
Source: PLoS One. 2018 Dec 26;13(12):e0208432. doi: 10.1371/journal.pone.0208432 (PMC6306154; doi:10.1371/journal.pone.0208432)
Supplement: S1 Table — A distance matrix of POCP values is given for genera included and shows that the within genus percentages are generally higher than 50% except for Treponema. (XLSX) [file pone.0208432.s001.xlsx]

## Sheet: list
species_1	species_2	POCP
B_americana_SCW41_proteome.fasta	B_afzelii_PKo_proteome.fasta	90.66
B_bavariensis_PBi_proteome.fasta	B_afzelii_PKo_proteome.fasta	93.12
B_bissettiae_DN127_proteome.fasta	B_afzelii_PKo_proteome.fasta	93.66
B_burgdorferi_B31_proteome.fasta	B_afzelii_PKo_proteome.fasta	93.79
B_californiensis_CA446_proteome.fasta	B_afzelii_PKo_proteome.fasta	91.49
B_carolinensis_SCW22_proteome.fasta	B_afzelii_PKo_proteome.fasta	90.38
B_chilensis_VA1_proteome.fasta	B_afzelii_PKo_proteome.fasta	83.79
B_finlandensis_SV1_proteome.fasta	B_afzelii_PKo_proteome.fasta	93.1
B_garinii_20047_proteome.fasta	B_afzelii_PKo_proteome.fasta	92.17
B_japonica_HO14_proteome.fasta	B_afzelii_PKo_proteome.fasta	93.48
B_kurtenbachii_25015_proteome.fasta	B_afzelii_PKo_proteome.fasta	93.09
B_lusitaniae_PoTiB2_proteome.fasta	B_afzelii_PKo_proteome.fasta	89.86
B_mayonii_MN14-1420_proteome.fasta	B_afzelii_PKo_proteome.fasta	93.29
B_spielmanii_A14S_proteome.fasta	B_afzelii_PKo_proteome.fasta	94.35
B_valaisiana_VS116_proteome.fasta	B_afzelii_PKo_proteome.fasta	93.29
B_yangtzensis_Okinawa_proteome.fasta	B_afzelii_PKo_proteome.fasta	90.56
B_afzelii_PKo_proteome.fasta	B_americana_SCW41_proteome.fasta	90.66
B_bavariensis_PBi_proteome.fasta	B_americana_SCW41_proteome.fasta	88.28
B_bissettiae_DN127_proteome.fasta	B_americana_SCW41_proteome.fasta	89.2
B_burgdorferi_B31_proteome.fasta	B_americana_SCW41_proteome.fasta	91.07
B_californiensis_CA446_proteome.fasta	B_americana_SCW41_proteome.fasta	89.44
B_carolinensis_SCW22_proteome.fasta	B_americana_SCW41_proteome.fasta	89.46
B_chilensis_VA1_proteome.fasta	B_americana_SCW41_proteome.fasta	87.96
B_finlandensis_SV1_proteome.fasta	B_americana_SCW41_proteome.fasta	91.45
B_garinii_20047_proteome.fasta	B_americana_SCW41_proteome.fasta	90.09
B_japonica_HO14_proteome.fasta	B_americana_SCW41_proteome.fasta	90.49
B_kurtenbachii_25015_proteome.fasta	B_americana_SCW41_proteome.fasta	89.88
B_lusitaniae_PoTiB2_proteome.fasta	B_americana_SCW41_proteome.fasta	88.76
B_mayonii_MN14-1420_proteome.fasta	B_americana_SCW41_proteome.fasta	91.18
B_spielmanii_A14S_proteome.fasta	B_americana_SCW41_proteome.fasta	88.94
B_valaisiana_VS116_proteome.fasta	B_americana_SCW41_proteome.fasta	91.45
B_yangtzensis_Okinawa_proteome.fasta	B_americana_SCW41_proteome.fasta	86.67
B_afzelii_PKo_proteome.fasta	B_bavariensis_PBi_proteome.fasta	93.12
B_americana_SCW41_proteome.fasta	B_bavariensis_PBi_proteome.fasta	88.28
B_bissettiae_DN127_proteome.fasta	B_bavariensis_PBi_proteome.fasta	92.52
B_burgdorferi_B31_proteome.fasta	B_bavariensis_PBi_proteome.fasta	91.81
B_californiensis_CA446_proteome.fasta	B_bavariensis_PBi_proteome.fasta	91.99
B_carolinensis_SCW22_proteome.fasta	B_bavariensis_PBi_proteome.fasta	90.22
B_chilensis_VA1_proteome.fasta	B_bavariensis_PBi_proteome.fasta	84.41
B_finlandensis_SV1_proteome.fasta	B_bavariensis_PBi_proteome.fasta	90.81
B_garinii_20047_proteome.fasta	B_bavariensis_PBi_proteome.fasta	92.46
B_japonica_HO14_proteome.fasta	B_bavariensis_PBi_proteome.fasta	91.22
B_kurtenbachii_25015_proteome.fasta	B_bavariensis_PBi_proteome.fasta	92.97
B_lusitaniae_PoTiB2_proteome.fasta	B_bavariensis_PBi_proteome.fasta	87.69
B_mayonii_MN14-1420_proteome.fasta	B_bavariensis_PBi_proteome.fasta	90.42
B_spielmanii_A14S_proteome.fasta	B_bavariensis_PBi_proteome.fasta	90.6
B_valaisiana_VS116_proteome.fasta	B_bavariensis_PBi_proteome.fasta	88.65
B_yangtzensis_Okinawa_proteome.fasta	B_bavariensis_PBi_proteome.fasta	90.81
B_afzelii_PKo_proteome.fasta	B_bissettiae_DN127_proteome.fasta	93.66
B_americana_SCW41_proteome.fasta	B_bissettiae_DN127_proteome.fasta	89.2
B_bavariensis_PBi_proteome.fasta	B_bissettiae_DN127_proteome.fasta	92.52
B_burgdorferi_B31_proteome.fasta	B_bissettiae_DN127_proteome.fasta	93.59
B_californiensis_CA446_proteome.fasta	B_bissettiae_DN127_proteome.fasta	92.53
B_carolinensis_SCW22_proteome.fasta	B_bissettiae_DN127_proteome.fasta	91.06
B_chilensis_VA1_proteome.fasta	B_bissettiae_DN127_proteome.fasta	81.55
B_finlandensis_SV1_proteome.fasta	B_bissettiae_DN127_proteome.fasta	92.3
B_garinii_20047_proteome.fasta	B_bissettiae_DN127_proteome.fasta	90.84
B_japonica_HO14_proteome.fasta	B_bissettiae_DN127_proteome.fasta	91.57
B_kurtenbachii_25015_proteome.fasta	B_bissettiae_DN127_proteome.fasta	93.64
B_lusitaniae_PoTiB2_proteome.fasta	B_bissettiae_DN127_proteome.fasta	88.3
B_mayonii_MN14-1420_proteome.fasta	B_bissettiae_DN127_proteome.fasta	91.55
B_spielmanii_A14S_proteome.fasta	B_bissettiae_DN127_proteome.fasta	91.65
B_valaisiana_VS116_proteome.fasta	B_bissettiae_DN127_proteome.fasta	90.25
B_yangtzensis_Okinawa_proteome.fasta	B_bissettiae_DN127_proteome.fasta	90.46
B_afzelii_PKo_proteome.fasta	B_burgdorferi_B31_proteome.fasta	93.79
B_americana_SCW41_proteome.fasta	B_burgdorferi_B31_proteome.fasta	91.07
B_bavariensis_PBi_proteome.fasta	B_burgdorferi_B31_proteome.fasta	91.81
B_bissettiae_DN127_proteome.fasta	B_burgdorferi_B31_proteome.fasta	93.59
B_californiensis_CA446_proteome.fasta	B_burgdorferi_B31_proteome.fasta	91
B_carolinensis_SCW22_proteome.fasta	B_burgdorferi_B31_proteome.fasta	90.46
B_chilensis_VA1_proteome.fasta	B_burgdorferi_B31_proteome.fasta	81.08
B_finlandensis_SV1_proteome.fasta	B_burgdorferi_B31_proteome.fasta	92.26
B_garinii_20047_proteome.fasta	B_burgdorferi_B31_proteome.fasta	91.35
B_japonica_HO14_proteome.fasta	B_burgdorferi_B31_proteome.fasta	91.63
B_kurtenbachii_25015_proteome.fasta	B_burgdorferi_B31_proteome.fasta	92.77
B_lusitaniae_PoTiB2_proteome.fasta	B_burgdorferi_B31_proteome.fasta	88.59
B_mayonii_MN14-1420_proteome.fasta	B_burgdorferi_B31_proteome.fasta	93.36
B_spielmanii_A14S_proteome.fasta	B_burgdorferi_B31_proteome.fasta	91.25
B_valaisiana_VS116_proteome.fasta	B_burgdorferi_B31_proteome.fasta	91.32
B_yangtzensis_Okinawa_proteome.fasta	B_burgdorferi_B31_proteome.fasta	89.01
B_afzelii_PKo_proteome.fasta	B_californiensis_CA446_proteome.fasta	91.49
B_americana_SCW41_proteome.fasta	B_californiensis_CA446_proteome.fasta	89.44
B_bavariensis_PBi_proteome.fasta	B_californiensis_CA446_proteome.fasta	91.99
B_bissettiae_DN127_proteome.fasta	B_californiensis_CA446_proteome.fasta	92.53
B_burgdorferi_B31_proteome.fasta	B_californiensis_CA446_proteome.fasta	91
B_carolinensis_SCW22_proteome.fasta	B_californiensis_CA446_proteome.fasta	92.73
B_chilensis_VA1_proteome.fasta	B_californiensis_CA446_proteome.fasta	87.04
B_finlandensis_SV1_proteome.fasta	B_californiensis_CA446_proteome.fasta	90.44
B_garinii_20047_proteome.fasta	B_californiensis_CA446_proteome.fasta	90.36
B_japonica_HO14_proteome.fasta	B_californiensis_CA446_proteome.fasta	91.59
B_kurtenbachii_25015_proteome.fasta	B_californiensis_CA446_proteome.fasta	94.06
B_lusitaniae_PoTiB2_proteome.fasta	B_californiensis_CA446_proteome.fasta	88.14
B_mayonii_MN14-1420_proteome.fasta	B_californiensis_CA446_proteome.fasta	90.98
B_spielmanii_A14S_proteome.fasta	B_californiensis_CA446_proteome.fasta	89.51
B_valaisiana_VS116_proteome.fasta	B_californiensis_CA446_proteome.fasta	89.38
B_yangtzensis_Okinawa_proteome.fasta	B_californiensis_CA446_proteome.fasta	89.96
B_afzelii_PKo_proteome.fasta	B_carolinensis_SCW22_proteome.fasta	90.38
B_americana_SCW41_proteome.fasta	B_carolinensis_SCW22_proteome.fasta	89.46
B_bavariensis_PBi_proteome.fasta	B_carolinensis_SCW22_proteome.fasta	90.22
B_bissettiae_DN127_proteome.fasta	B_carolinensis_SCW22_proteome.fasta	91.06
B_burgdorferi_B31_proteome.fasta	B_carolinensis_SCW22_proteome.fasta	90.46
B_californiensis_CA446_proteome.fasta	B_carolinensis_SCW22_proteome.fasta	92.73
B_chilensis_VA1_proteome.fasta	B_carolinensis_SCW22_proteome.fasta	85.62
B_finlandensis_SV1_proteome.fasta	B_carolinensis_SCW22_proteome.fasta	89.76
B_garinii_20047_proteome.fasta	B_carolinensis_SCW22_proteome.fasta	89.02
B_japonica_HO14_proteome.fasta	B_carolinensis_SCW22_proteome.fasta	90.01
B_kurtenbachii_25015_proteome.fasta	B_carolinensis_SCW22_proteome.fasta	93.49
B_lusitaniae_PoTiB2_proteome.fasta	B_carolinensis_SCW22_proteome.fasta	86.91
B_mayonii_MN14-1420_proteome.fasta	B_carolinensis_SCW22_proteome.fasta	90.93
B_spielmanii_A14S_proteome.fasta	B_carolinensis_SCW22_proteome.fasta	88.72
B_valaisiana_VS116_proteome.fasta	B_carolinensis_SCW22_proteome.fasta	88.22
B_yangtzensis_Okinawa_proteome.fasta	B_carolinensis_SCW22_proteome.fasta	89.06
B_afzelii_PKo_proteome.fasta	B_chilensis_VA1_proteome.fasta	83.79
B_americana_SCW41_proteome.fasta	B_chilensis_VA1_proteome.fasta	87.96
B_bavariensis_PBi_proteome.fasta	B_chilensis_VA1_proteome.fasta	84.41
B_bissettiae_DN127_proteome.fasta	B_chilensis_VA1_proteome.fasta	81.55
B_burgdorferi_B31_proteome.fasta	B_chilensis_VA1_proteome.fasta	81.08
B_californiensis_CA446_proteome.fasta	B_chilensis_VA1_proteome.fasta	87.04
B_carolinensis_SCW22_proteome.fasta	B_chilensis_VA1_proteome.fasta	85.62
B_finlandensis_SV1_proteome.fasta	B_chilensis_VA1_proteome.fasta	86.12
B_garinii_20047_proteome.fasta	B_chilensis_VA1_proteome.fasta	86.29
B_japonica_HO14_proteome.fasta	B_chilensis_VA1_proteome.fasta	88.44
B_kurtenbachii_25015_proteome.fasta	B_chilensis_VA1_proteome.fasta	87.54
B_lusitaniae_PoTiB2_proteome.fasta	B_chilensis_VA1_proteome.fasta	87.34
B_mayonii_MN14-1420_proteome.fasta	B_chilensis_VA1_proteome.fasta	86.61
B_spielmanii_A14S_proteome.fasta	B_chilensis_VA1_proteome.fasta	86.82
B_valaisiana_VS116_proteome.fasta	B_chilensis_VA1_proteome.fasta	87.36
B_yangtzensis_Okinawa_proteome.fasta	B_chilensis_VA1_proteome.fasta	83.48
B_afzelii_PKo_proteome.fasta	B_finlandensis_SV1_proteome.fasta	93.1
B_americana_SCW41_proteome.fasta	B_finlandensis_SV1_proteome.fasta	91.45
B_bavariensis_PBi_proteome.fasta	B_finlandensis_SV1_proteome.fasta	90.81
B_bissettiae_DN127_proteome.fasta	B_finlandensis_SV1_proteome.fasta	92.3
B_burgdorferi_B31_proteome.fasta	B_finlandensis_SV1_proteome.fasta	92.26
B_californiensis_CA446_proteome.fasta	B_finlandensis_SV1_proteome.fasta	90.44
B_carolinensis_SCW22_proteome.fasta	B_finlandensis_SV1_proteome.fasta	89.76
B_chilensis_VA1_proteome.fasta	B_finlandensis_SV1_proteome.fasta	86.12
B_garinii_20047_proteome.fasta	B_finlandensis_SV1_proteome.fasta	90.45
B_japonica_HO14_proteome.fasta	B_finlandensis_SV1_proteome.fasta	92.12
B_kurtenbachii_25015_proteome.fasta	B_finlandensis_SV1_proteome.fasta	91.43
B_lusitaniae_PoTiB2_proteome.fasta	B_finlandensis_SV1_proteome.fasta	89.65
B_mayonii_MN14-1420_proteome.fasta	B_finlandensis_SV1_proteome.fasta	94.28
B_spielmanii_A14S_proteome.fasta	B_finlandensis_SV1_proteome.fasta	92.71
B_valaisiana_VS116_proteome.fasta	B_finlandensis_SV1_proteome.fasta	92.15
B_yangtzensis_Okinawa_proteome.fasta	B_finlandensis_SV1_proteome.fasta	88.1
B_afzelii_PKo_proteome.fasta	B_garinii_20047_proteome.fasta	92.17
B_americana_SCW41_proteome.fasta	B_garinii_20047_proteome.fasta	90.09
B_bavariensis_PBi_proteome.fasta	B_garinii_20047_proteome.fasta	92.46
B_bissettiae_DN127_proteome.fasta	B_garinii_20047_proteome.fasta	90.84
B_burgdorferi_B31_proteome.fasta	B_garinii_20047_proteome.fasta	91.35
B_californiensis_CA446_proteome.fasta	B_garinii_20047_proteome.fasta	90.36
B_carolinensis_SCW22_proteome.fasta	B_garinii_20047_proteome.fasta	89.02
B_chilensis_VA1_proteome.fasta	B_garinii_20047_proteome.fasta	86.29
B_finlandensis_SV1_proteome.fasta	B_garinii_20047_proteome.fasta	90.45
B_japonica_HO14_proteome.fasta	B_garinii_20047_proteome.fasta	91.11
B_kurtenbachii_25015_proteome.fasta	B_garinii_20047_proteome.fasta	91.59
B_lusitaniae_PoTiB2_proteome.fasta	B_garinii_20047_proteome.fasta	88.74
B_mayonii_MN14-1420_proteome.fasta	B_garinii_20047_proteome.fasta	90.98
B_spielmanii_A14S_proteome.fasta	B_garinii_20047_proteome.fasta	89.41
B_valaisiana_VS116_proteome.fasta	B_garinii_20047_proteome.fasta	90.1
B_yangtzensis_Okinawa_proteome.fasta	B_garinii_20047_proteome.fasta	89.09
B_afzelii_PKo_proteome.fasta	B_japonica_HO14_proteome.fasta	93.48
B_americana_SCW41_proteome.fasta	B_japonica_HO14_proteome.fasta	90.49
B_bavariensis_PBi_proteome.fasta	B_japonica_HO14_proteome.fasta	91.22
B_bissettiae_DN127_proteome.fasta	B_japonica_HO14_proteome.fasta	91.57
B_burgdorferi_B31_proteome.fasta	B_japonica_HO14_proteome.fasta	91.63
B_californiensis_CA446_proteome.fasta	B_japonica_HO14_proteome.fasta	91.59
B_carolinensis_SCW22_proteome.fasta	B_japonica_HO14_proteome.fasta	90.01
B_chilensis_VA1_proteome.fasta	B_japonica_HO14_proteome.fasta	88.44
B_finlandensis_SV1_proteome.fasta	B_japonica_HO14_proteome.fasta	92.12
B_garinii_20047_proteome.fasta	B_japonica_HO14_proteome.fasta	91.11
B_kurtenbachii_25015_proteome.fasta	B_japonica_HO14_proteome.fasta	92.11
B_lusitaniae_PoTiB2_proteome.fasta	B_japonica_HO14_proteome.fasta	89.82
B_mayonii_MN14-1420_proteome.fasta	B_japonica_HO14_proteome.fasta	92.78
B_spielmanii_A14S_proteome.fasta	B_japonica_HO14_proteome.fasta	92.31
B_valaisiana_VS116_proteome.fasta	B_japonica_HO14_proteome.fasta	91.34
B_yangtzensis_Okinawa_proteome.fasta	B_japonica_HO14_proteome.fasta	89.9
B_afzelii_PKo_proteome.fasta	B_kurtenbachii_25015_proteome.fasta	93.09
B_americana_SCW41_proteome.fasta	B_kurtenbachii_25015_proteome.fasta	89.88
B_bavariensis_PBi_proteome.fasta	B_kurtenbachii_25015_proteome.fasta	92.97
B_bissettiae_DN127_proteome.fasta	B_kurtenbachii_25015_proteome.fasta	93.64
B_burgdorferi_B31_proteome.fasta	B_kurtenbachii_25015_proteome.fasta	92.77
B_californiensis_CA446_proteome.fasta	B_kurtenbachii_25015_proteome.fasta	94.06
B_carolinensis_SCW22_proteome.fasta	B_kurtenbachii_25015_proteome.fasta	93.49
B_chilensis_VA1_proteome.fasta	B_kurtenbachii_25015_proteome.fasta	87.54
B_finlandensis_SV1_proteome.fasta	B_kurtenbachii_25015_proteome.fasta	91.43
B_garinii_20047_proteome.fasta	B_kurtenbachii_25015_proteome.fasta	91.59
B_japonica_HO14_proteome.fasta	B_kurtenbachii_25015_proteome.fasta	92.11
B_lusitaniae_PoTiB2_proteome.fasta	B_kurtenbachii_25015_proteome.fasta	88.81
B_mayonii_MN14-1420_proteome.fasta	B_kurtenbachii_25015_proteome.fasta	92.86
B_spielmanii_A14S_proteome.fasta	B_kurtenbachii_25015_proteome.fasta	90.73
B_valaisiana_VS116_proteome.fasta	B_kurtenbachii_25015_proteome.fasta	90.27
B_yangtzensis_Okinawa_proteome.fasta	B_kurtenbachii_25015_proteome.fasta	91.23
B_afzelii_PKo_proteome.fasta	B_lusitaniae_PoTiB2_proteome.fasta	89.86
B_americana_SCW41_proteome.fasta	B_lusitaniae_PoTiB2_proteome.fasta	88.76
B_bavariensis_PBi_proteome.fasta	B_lusitaniae_PoTiB2_proteome.fasta	87.69
B_bissettiae_DN127_proteome.fasta	B_lusitaniae_PoTiB2_proteome.fasta	88.3
B_burgdorferi_B31_proteome.fasta	B_lusitaniae_PoTiB2_proteome.fasta	88.59
B_californiensis_CA446_proteome.fasta	B_lusitaniae_PoTiB2_proteome.fasta	88.14
B_carolinensis_SCW22_proteome.fasta	B_lusitaniae_PoTiB2_proteome.fasta	86.91
B_chilensis_VA1_proteome.fasta	B_lusitaniae_PoTiB2_proteome.fasta	87.34
B_finlandensis_SV1_proteome.fasta	B_lusitaniae_PoTiB2_proteome.fasta	89.65
B_garinii_20047_proteome.fasta	B_lusitaniae_PoTiB2_proteome.fasta	88.74
B_japonica_HO14_proteome.fasta	B_lusitaniae_PoTiB2_proteome.fasta	89.82
B_kurtenbachii_25015_proteome.fasta	B_lusitaniae_PoTiB2_proteome.fasta	88.81
B_mayonii_MN14-1420_proteome.fasta	B_lusitaniae_PoTiB2_proteome.fasta	89.05
B_spielmanii_A14S_proteome.fasta	B_lusitaniae_PoTiB2_proteome.fasta	88.98
B_valaisiana_VS116_proteome.fasta	B_lusitaniae_PoTiB2_proteome.fasta	89.79
B_yangtzensis_Okinawa_proteome.fasta	B_lusitaniae_PoTiB2_proteome.fasta	86.05
B_afzelii_PKo_proteome.fasta	B_mayonii_MN14-1420_proteome.fasta	93.29
B_americana_SCW41_proteome.fasta	B_mayonii_MN14-1420_proteome.fasta	91.18
B_bavariensis_PBi_proteome.fasta	B_mayonii_MN14-1420_proteome.fasta	90.42
B_bissettiae_DN127_proteome.fasta	B_mayonii_MN14-1420_proteome.fasta	91.55
B_burgdorferi_B31_proteome.fasta	B_mayonii_MN14-1420_proteome.fasta	93.36
B_californiensis_CA446_proteome.fasta	B_mayonii_MN14-1420_proteome.fasta	90.98
B_carolinensis_SCW22_proteome.fasta	B_mayonii_MN14-1420_proteome.fasta	90.93
B_chilensis_VA1_proteome.fasta	B_mayonii_MN14-1420_proteome.fasta	86.61
B_finlandensis_SV1_proteome.fasta	B_mayonii_MN14-1420_proteome.fasta	94.28
B_garinii_20047_proteome.fasta	B_mayonii_MN14-1420_proteome.fasta	90.98
B_japonica_HO14_proteome.fasta	B_mayonii_MN14-1420_proteome.fasta	92.78
B_kurtenbachii_25015_proteome.fasta	B_mayonii_MN14-1420_proteome.fasta	92.86
B_lusitaniae_PoTiB2_proteome.fasta	B_mayonii_MN14-1420_proteome.fasta	89.05
B_spielmanii_A14S_proteome.fasta	B_mayonii_MN14-1420_proteome.fasta	92.63
B_valaisiana_VS116_proteome.fasta	B_mayonii_MN14-1420_proteome.fasta	92.14
B_yangtzensis_Okinawa_proteome.fasta	B_mayonii_MN14-1420_proteome.fasta	88.27
B_afzelii_PKo_proteome.fasta	B_spielmanii_A14S_proteome.fasta	94.35
B_americana_SCW41_proteome.fasta	B_spielmanii_A14S_proteome.fasta	88.94
B_bavariensis_PBi_proteome.fasta	B_spielmanii_A14S_proteome.fasta	90.6
B_bissettiae_DN127_proteome.fasta	B_spielmanii_A14S_proteome.fasta	91.65
B_burgdorferi_B31_proteome.fasta	B_spielmanii_A14S_proteome.fasta	91.25
B_californiensis_CA446_proteome.fasta	B_spielmanii_A14S_proteome.fasta	89.51
B_carolinensis_SCW22_proteome.fasta	B_spielmanii_A14S_proteome.fasta	88.72
B_chilensis_VA1_proteome.fasta	B_spielmanii_A14S_proteome.fasta	86.82
B_finlandensis_SV1_proteome.fasta	B_spielmanii_A14S_proteome.fasta	92.71
B_garinii_20047_proteome.fasta	B_spielmanii_A14S_proteome.fasta	89.41
B_japonica_HO14_proteome.fasta	B_spielmanii_A14S_proteome.fasta	92.31
B_kurtenbachii_25015_proteome.fasta	B_spielmanii_A14S_proteome.fasta	90.73
B_lusitaniae_PoTiB2_proteome.fasta	B_spielmanii_A14S_proteome.fasta	88.98
B_mayonii_MN14-1420_proteome.fasta	B_spielmanii_A14S_proteome.fasta	92.63
B_valaisiana_VS116_proteome.fasta	B_spielmanii_A14S_proteome.fasta	92.38
B_yangtzensis_Okinawa_proteome.fasta	B_spielmanii_A14S_proteome.fasta	88.41
B_afzelii_PKo_proteome.fasta	B_valaisiana_VS116_proteome.fasta	93.29
B_americana_SCW41_proteome.fasta	B_valaisiana_VS116_proteome.fasta	91.45
B_bavariensis_PBi_proteome.fasta	B_valaisiana_VS116_proteome.fasta	88.65
B_bissettiae_DN127_proteome.fasta	B_valaisiana_VS116_proteome.fasta	90.25
B_burgdorferi_B31_proteome.fasta	B_valaisiana_VS116_proteome.fasta	91.32
B_californiensis_CA446_proteome.fasta	B_valaisiana_VS116_proteome.fasta	89.38
B_carolinensis_SCW22_proteome.fasta	B_valaisiana_VS116_proteome.fasta	88.22
B_chilensis_VA1_proteome.fasta	B_valaisiana_VS116_proteome.fasta	87.36
B_finlandensis_SV1_proteome.fasta	B_valaisiana_VS116_proteome.fasta	92.15
B_garinii_20047_proteome.fasta	B_valaisiana_VS116_proteome.fasta	90.1
B_japonica_HO14_proteome.fasta	B_valaisiana_VS116_proteome.fasta	91.34
B_kurtenbachii_25015_proteome.fasta	B_valaisiana_VS116_proteome.fasta	90.27
B_lusitaniae_PoTiB2_proteome.fasta	B_valaisiana_VS116_proteome.fasta	89.79
B_mayonii_MN14-1420_proteome.fasta	B_valaisiana_VS116_proteome.fasta	92.14
B_spielmanii_A14S_proteome.fasta	B_valaisiana_VS116_proteome.fasta	92.38
B_yangtzensis_Okinawa_proteome.fasta	B_valaisiana_VS116_proteome.fasta	87.44
B_afzelii_PKo_proteome.fasta	B_yangtzensis_Okinawa_proteome.fasta	90.56
B_americana_SCW41_proteome.fasta	B_yangtzensis_Okinawa_proteome.fasta	86.67
B_bavariensis_PBi_proteome.fasta	B_yangtzensis_Okinawa_proteome.fasta	90.81
B_bissettiae_DN127_proteome.fasta	B_yangtzensis_Okinawa_proteome.fasta	90.46
B_burgdorferi_B31_proteome.fasta	B_yangtzensis_Okinawa_proteome.fasta	89.01
B_californiensis_CA446_proteome.fasta	B_yangtzensis_Okinawa_proteome.fasta	89.96
B_carolinensis_SCW22_proteome.fasta	B_yangtzensis_Okinawa_proteome.fasta	89.06
B_chilensis_VA1_proteome.fasta	B_yangtzensis_Okinawa_proteome.fasta	83.48
B_finlandensis_SV1_proteome.fasta	B_yangtzensis_Okinawa_proteome.fasta	88.1
B_garinii_20047_proteome.fasta	B_yangtzensis_Okinawa_proteome.fasta	89.09
B_japonica_HO14_proteome.fasta	B_yangtzensis_Okinawa_proteome.fasta	89.9
B_kurtenbachii_25015_proteome.fasta	B_yangtzensis_Okinawa_proteome.fasta	91.23
B_lusitaniae_PoTiB2_proteome.fasta	B_yangtzensis_Okinawa_proteome.fasta	86.05
B_mayonii_MN14-1420_proteome.fasta	B_yangtzensis_Okinawa_proteome.fasta	88.27
B_spielmanii_A14S_proteome.fasta	B_yangtzensis_Okinawa_proteome.fasta	88.41
B_valaisiana_VS116_proteome.fasta	B_yangtzensis_Okinawa_proteome.fasta	87.44
B_turcica_PB-MS_proteome.fasta	B_tachyglossi_1268-Bc_F10_NS_proteome.fasta	83.05
B_tachyglossi_1268-Bc_F10_NS_proteome.fasta	B_turcica_PB-MS_proteome.fasta	83.05
B_coriaceae_Co53_proteome.fasta	B_anserina_BA2_proteome.fasta	68.87
B_crociduarae_Achema_proteome.fasta	B_anserina_BA2_proteome.fasta	75.64
B_duttonii_Ly_proteome.fasta	B_anserina_BA2_proteome.fasta	75.69
B_hermsii_HS1_proteome.fasta	B_anserina_BA2_proteome.fasta	81.31
B_hispanica_CRI_proteome.fasta	B_anserina_BA2_proteome.fasta	70.63
B_miyamotoi_LB-2001_proteome.fasta	B_anserina_BA2_proteome.fasta	88.55
B_parkeri_SLO_proteome.fasta	B_anserina_BA2_proteome.fasta	80.94
B_persica_No12_proteome.fasta	B_anserina_BA2_proteome.fasta	70.25
B_recurrentis_A1_proteome.fasta	B_anserina_BA2_proteome.fasta	83.24
B_turicatae_91E135_proteome.fasta	B_anserina_BA2_proteome.fasta	84.63
B_anserina_BA2_proteome.fasta	B_coriaceae_Co53_proteome.fasta	68.87
B_crociduarae_Achema_proteome.fasta	B_coriaceae_Co53_proteome.fasta	76.18
B_duttonii_Ly_proteome.fasta	B_coriaceae_Co53_proteome.fasta	80.65
B_hermsii_HS1_proteome.fasta	B_coriaceae_Co53_proteome.fasta	85.56
B_hispanica_CRI_proteome.fasta	B_coriaceae_Co53_proteome.fasta	81.31
B_miyamotoi_LB-2001_proteome.fasta	B_coriaceae_Co53_proteome.fasta	65.31
B_parkeri_SLO_proteome.fasta	B_coriaceae_Co53_proteome.fasta	75.86
B_persica_No12_proteome.fasta	B_coriaceae_Co53_proteome.fasta	77.95
B_recurrentis_A1_proteome.fasta	B_coriaceae_Co53_proteome.fasta	74.49
B_turicatae_91E135_proteome.fasta	B_coriaceae_Co53_proteome.fasta	84.72
B_anserina_BA2_proteome.fasta	B_crociduarae_Achema_proteome.fasta	75.64
B_coriaceae_Co53_proteome.fasta	B_crociduarae_Achema_proteome.fasta	76.18
B_duttonii_Ly_proteome.fasta	B_crociduarae_Achema_proteome.fasta	89.95
B_hermsii_HS1_proteome.fasta	B_crociduarae_Achema_proteome.fasta	82.32
B_hispanica_CRI_proteome.fasta	B_crociduarae_Achema_proteome.fasta	88.02
B_miyamotoi_LB-2001_proteome.fasta	B_crociduarae_Achema_proteome.fasta	75.26
B_parkeri_SLO_proteome.fasta	B_crociduarae_Achema_proteome.fasta	75.99
B_persica_No12_proteome.fasta	B_crociduarae_Achema_proteome.fasta	79.9
B_recurrentis_A1_proteome.fasta	B_crociduarae_Achema_proteome.fasta	87.37
B_turicatae_91E135_proteome.fasta	B_crociduarae_Achema_proteome.fasta	84.25
B_anserina_BA2_proteome.fasta	B_duttonii_Ly_proteome.fasta	75.69
B_coriaceae_Co53_proteome.fasta	B_duttonii_Ly_proteome.fasta	80.65
B_crociduarae_Achema_proteome.fasta	B_duttonii_Ly_proteome.fasta	89.95
B_hermsii_HS1_proteome.fasta	B_duttonii_Ly_proteome.fasta	86.19
B_hispanica_CRI_proteome.fasta	B_duttonii_Ly_proteome.fasta	93.07
B_miyamotoi_LB-2001_proteome.fasta	B_duttonii_Ly_proteome.fasta	74.81
B_parkeri_SLO_proteome.fasta	B_duttonii_Ly_proteome.fasta	79.93
B_persica_No12_proteome.fasta	B_duttonii_Ly_proteome.fasta	83.55
B_recurrentis_A1_proteome.fasta	B_duttonii_Ly_proteome.fasta	89.29
B_turicatae_91E135_proteome.fasta	B_duttonii_Ly_proteome.fasta	87.87
B_anserina_BA2_proteome.fasta	B_hermsii_HS1_proteome.fasta	81.31
B_coriaceae_Co53_proteome.fasta	B_hermsii_HS1_proteome.fasta	85.56
B_crociduarae_Achema_proteome.fasta	B_hermsii_HS1_proteome.fasta	82.32
B_duttonii_Ly_proteome.fasta	B_hermsii_HS1_proteome.fasta	86.19
B_hispanica_CRI_proteome.fasta	B_hermsii_HS1_proteome.fasta	85.7
B_miyamotoi_LB-2001_proteome.fasta	B_hermsii_HS1_proteome.fasta	79.14
B_parkeri_SLO_proteome.fasta	B_hermsii_HS1_proteome.fasta	81.9
B_persica_No12_proteome.fasta	B_hermsii_HS1_proteome.fasta	82.88
B_recurrentis_A1_proteome.fasta	B_hermsii_HS1_proteome.fasta	82.77
B_turicatae_91E135_proteome.fasta	B_hermsii_HS1_proteome.fasta	89.32
B_anserina_BA2_proteome.fasta	B_hispanica_CRI_proteome.fasta	70.63
B_coriaceae_Co53_proteome.fasta	B_hispanica_CRI_proteome.fasta	81.31
B_crociduarae_Achema_proteome.fasta	B_hispanica_CRI_proteome.fasta	88.02
B_duttonii_Ly_proteome.fasta	B_hispanica_CRI_proteome.fasta	93.07
B_hermsii_HS1_proteome.fasta	B_hispanica_CRI_proteome.fasta	85.7
B_miyamotoi_LB-2001_proteome.fasta	B_hispanica_CRI_proteome.fasta	65.98
B_parkeri_SLO_proteome.fasta	B_hispanica_CRI_proteome.fasta	76.64
B_persica_No12_proteome.fasta	B_hispanica_CRI_proteome.fasta	84.47
B_recurrentis_A1_proteome.fasta	B_hispanica_CRI_proteome.fasta	83.1
B_turicatae_91E135_proteome.fasta	B_hispanica_CRI_proteome.fasta	86.89
B_anserina_BA2_proteome.fasta	B_miyamotoi_LB-2001_proteome.fasta	88.55
B_coriaceae_Co53_proteome.fasta	B_miyamotoi_LB-2001_proteome.fasta	65.31
B_crociduarae_Achema_proteome.fasta	B_miyamotoi_LB-2001_proteome.fasta	75.26
B_duttonii_Ly_proteome.fasta	B_miyamotoi_LB-2001_proteome.fasta	74.81
B_hermsii_HS1_proteome.fasta	B_miyamotoi_LB-2001_proteome.fasta	79.14
B_hispanica_CRI_proteome.fasta	B_miyamotoi_LB-2001_proteome.fasta	65.98
B_parkeri_SLO_proteome.fasta	B_miyamotoi_LB-2001_proteome.fasta	84.83
B_persica_No12_proteome.fasta	B_miyamotoi_LB-2001_proteome.fasta	68.19
B_recurrentis_A1_proteome.fasta	B_miyamotoi_LB-2001_proteome.fasta	82.93
B_turicatae_91E135_proteome.fasta	B_miyamotoi_LB-2001_proteome.fasta	87.73
B_anserina_BA2_proteome.fasta	B_parkeri_SLO_proteome.fasta	80.94
B_coriaceae_Co53_proteome.fasta	B_parkeri_SLO_proteome.fasta	75.86
B_crociduarae_Achema_proteome.fasta	B_parkeri_SLO_proteome.fasta	75.99
B_duttonii_Ly_proteome.fasta	B_parkeri_SLO_proteome.fasta	79.93
B_hermsii_HS1_proteome.fasta	B_parkeri_SLO_proteome.fasta	81.9
B_hispanica_CRI_proteome.fasta	B_parkeri_SLO_proteome.fasta	76.64
B_miyamotoi_LB-2001_proteome.fasta	B_parkeri_SLO_proteome.fasta	84.83
B_persica_No12_proteome.fasta	B_parkeri_SLO_proteome.fasta	73.75
B_recurrentis_A1_proteome.fasta	B_parkeri_SLO_proteome.fasta	79.57
B_turicatae_91E135_proteome.fasta	B_parkeri_SLO_proteome.fasta	90.05
B_anserina_BA2_proteome.fasta	B_persica_No12_proteome.fasta	70.25
B_coriaceae_Co53_proteome.fasta	B_persica_No12_proteome.fasta	77.95
B_crociduarae_Achema_proteome.fasta	B_persica_No12_proteome.fasta	79.9
B_duttonii_Ly_proteome.fasta	B_persica_No12_proteome.fasta	83.55
B_hermsii_HS1_proteome.fasta	B_persica_No12_proteome.fasta	82.88
B_hispanica_CRI_proteome.fasta	B_persica_No12_proteome.fasta	84.47
B_miyamotoi_LB-2001_proteome.fasta	B_persica_No12_proteome.fasta	68.19
B_parkeri_SLO_proteome.fasta	B_persica_No12_proteome.fasta	73.75
B_recurrentis_A1_proteome.fasta	B_persica_No12_proteome.fasta	78.51
B_turicatae_91E135_proteome.fasta	B_persica_No12_proteome.fasta	83.89
B_anserina_BA2_proteome.fasta	B_recurrentis_A1_proteome.fasta	83.24
B_coriaceae_Co53_proteome.fasta	B_recurrentis_A1_proteome.fasta	74.49
B_crociduarae_Achema_proteome.fasta	B_recurrentis_A1_proteome.fasta	87.37
B_duttonii_Ly_proteome.fasta	B_recurrentis_A1_proteome.fasta	89.29
B_hermsii_HS1_proteome.fasta	B_recurrentis_A1_proteome.fasta	82.77
B_hispanica_CRI_proteome.fasta	B_recurrentis_A1_proteome.fasta	83.1
B_miyamotoi_LB-2001_proteome.fasta	B_recurrentis_A1_proteome.fasta	82.93
B_parkeri_SLO_proteome.fasta	B_recurrentis_A1_proteome.fasta	79.57
B_persica_No12_proteome.fasta	B_recurrentis_A1_proteome.fasta	78.51
B_turicatae_91E135_proteome.fasta	B_recurrentis_A1_proteome.fasta	86.06
B_anserina_BA2_proteome.fasta	B_turicatae_91E135_proteome.fasta	84.63
B_coriaceae_Co53_proteome.fasta	B_turicatae_91E135_proteome.fasta	84.72
B_crociduarae_Achema_proteome.fasta	B_turicatae_91E135_proteome.fasta	84.25
B_duttonii_Ly_proteome.fasta	B_turicatae_91E135_proteome.fasta	87.87
B_hermsii_HS1_proteome.fasta	B_turicatae_91E135_proteome.fasta	89.32
B_hispanica_CRI_proteome.fasta	B_turicatae_91E135_proteome.fasta	86.89
B_miyamotoi_LB-2001_proteome.fasta	B_turicatae_91E135_proteome.fasta	87.73
B_parkeri_SLO_proteome.fasta	B_turicatae_91E135_proteome.fasta	90.05
B_persica_No12_proteome.fasta	B_turicatae_91E135_proteome.fasta	83.89
B_recurrentis_A1_proteome.fasta	B_turicatae_91E135_proteome.fasta	86.06
Brachyspira_hampsonii_30446.fasta	Brachyspira_alvinipulli_ATCC_51933.fasta	78.84
Brachyspira_hyodysenteriae_ATCC_27164.fasta	Brachyspira_alvinipulli_ATCC_51933.fasta	82.48
Brachyspira_innocens_ATCC_29796.fasta	Brachyspira_alvinipulli_ATCC_51933.fasta	80.95
Brachyspira_intermedia_PWS_A.fasta	Brachyspira_alvinipulli_ATCC_51933.fasta	78.41
Brachyspira_murdochii_DSM_12563.fasta	Brachyspira_alvinipulli_ATCC_51933.fasta	82.05
Brachyspira_pilosicoli_P43_6_78.fasta	Brachyspira_alvinipulli_ATCC_51933.fasta	74.1
Brachyspira_suanatina.fasta	Brachyspira_alvinipulli_ATCC_51933.fasta	82.02
Brachyspira_alvinipulli_ATCC_51933.fasta	Brachyspira_hampsonii_30446.fasta	78.84
Brachyspira_hyodysenteriae_ATCC_27164.fasta	Brachyspira_hampsonii_30446.fasta	87.12
Brachyspira_innocens_ATCC_29796.fasta	Brachyspira_hampsonii_30446.fasta	84.62
Brachyspira_intermedia_PWS_A.fasta	Brachyspira_hampsonii_30446.fasta	84.38
Brachyspira_murdochii_DSM_12563.fasta	Brachyspira_hampsonii_30446.fasta	85.34
Brachyspira_pilosicoli_P43_6_78.fasta	Brachyspira_hampsonii_30446.fasta	77.74
Brachyspira_suanatina.fasta	Brachyspira_hampsonii_30446.fasta	86.4
Brachyspira_alvinipulli_ATCC_51933.fasta	Brachyspira_hyodysenteriae_ATCC_27164.fasta	82.48
Brachyspira_hampsonii_30446.fasta	Brachyspira_hyodysenteriae_ATCC_27164.fasta	87.12
Brachyspira_innocens_ATCC_29796.fasta	Brachyspira_hyodysenteriae_ATCC_27164.fasta	83.86
Brachyspira_intermedia_PWS_A.fasta	Brachyspira_hyodysenteriae_ATCC_27164.fasta	85.63
Brachyspira_murdochii_DSM_12563.fasta	Brachyspira_hyodysenteriae_ATCC_27164.fasta	86.12
Brachyspira_pilosicoli_P43_6_78.fasta	Brachyspira_hyodysenteriae_ATCC_27164.fasta	79.29
Brachyspira_suanatina.fasta	Brachyspira_hyodysenteriae_ATCC_27164.fasta	91.21
Brachyspira_alvinipulli_ATCC_51933.fasta	Brachyspira_innocens_ATCC_29796.fasta	80.95
Brachyspira_hampsonii_30446.fasta	Brachyspira_innocens_ATCC_29796.fasta	84.62
Brachyspira_hyodysenteriae_ATCC_27164.fasta	Brachyspira_innocens_ATCC_29796.fasta	83.86
Brachyspira_intermedia_PWS_A.fasta	Brachyspira_innocens_ATCC_29796.fasta	83.43
Brachyspira_murdochii_DSM_12563.fasta	Brachyspira_innocens_ATCC_29796.fasta	88.88
Brachyspira_pilosicoli_P43_6_78.fasta	Brachyspira_innocens_ATCC_29796.fasta	76.92
Brachyspira_suanatina.fasta	Brachyspira_innocens_ATCC_29796.fasta	83.92
Brachyspira_alvinipulli_ATCC_51933.fasta	Brachyspira_intermedia_PWS_A.fasta	78.41
Brachyspira_hampsonii_30446.fasta	Brachyspira_intermedia_PWS_A.fasta	84.38
Brachyspira_hyodysenteriae_ATCC_27164.fasta	Brachyspira_intermedia_PWS_A.fasta	85.63
Brachyspira_innocens_ATCC_29796.fasta	Brachyspira_intermedia_PWS_A.fasta	83.43
Brachyspira_murdochii_DSM_12563.fasta	Brachyspira_intermedia_PWS_A.fasta	82.92
Brachyspira_pilosicoli_P43_6_78.fasta	Brachyspira_intermedia_PWS_A.fasta	76.74
Brachyspira_suanatina.fasta	Brachyspira_intermedia_PWS_A.fasta	85.74
Brachyspira_alvinipulli_ATCC_51933.fasta	Brachyspira_murdochii_DSM_12563.fasta	82.05
Brachyspira_hampsonii_30446.fasta	Brachyspira_murdochii_DSM_12563.fasta	85.34
Brachyspira_hyodysenteriae_ATCC_27164.fasta	Brachyspira_murdochii_DSM_12563.fasta	86.12
Brachyspira_innocens_ATCC_29796.fasta	Brachyspira_murdochii_DSM_12563.fasta	88.88
Brachyspira_intermedia_PWS_A.fasta	Brachyspira_murdochii_DSM_12563.fasta	82.92
Brachyspira_pilosicoli_P43_6_78.fasta	Brachyspira_murdochii_DSM_12563.fasta	79.37
Brachyspira_suanatina.fasta	Brachyspira_murdochii_DSM_12563.fasta	86.14
Brachyspira_alvinipulli_ATCC_51933.fasta	Brachyspira_pilosicoli_P43_6_78.fasta	74.1
Brachyspira_hampsonii_30446.fasta	Brachyspira_pilosicoli_P43_6_78.fasta	77.74
Brachyspira_hyodysenteriae_ATCC_27164.fasta	Brachyspira_pilosicoli_P43_6_78.fasta	79.29
Brachyspira_innocens_ATCC_29796.fasta	Brachyspira_pilosicoli_P43_6_78.fasta	76.92
Brachyspira_intermedia_PWS_A.fasta	Brachyspira_pilosicoli_P43_6_78.fasta	76.74
Brachyspira_murdochii_DSM_12563.fasta	Brachyspira_pilosicoli_P43_6_78.fasta	79.37
Brachyspira_suanatina.fasta	Brachyspira_pilosicoli_P43_6_78.fasta	79
Brachyspira_alvinipulli_ATCC_51933.fasta	Brachyspira_suanatina.fasta	82.02
Brachyspira_hampsonii_30446.fasta	Brachyspira_suanatina.fasta	86.4
Brachyspira_hyodysenteriae_ATCC_27164.fasta	Brachyspira_suanatina.fasta	91.21
Brachyspira_innocens_ATCC_29796.fasta	Brachyspira_suanatina.fasta	83.92
Brachyspira_intermedia_PWS_A.fasta	Brachyspira_suanatina.fasta	85.74
Brachyspira_murdochii_DSM_12563.fasta	Brachyspira_suanatina.fasta	86.14
Brachyspira_pilosicoli_P43_6_78.fasta	Brachyspira_suanatina.fasta	79
Brachyspira_alvinipulli_ATCC_51933.fasta	Spirochaeta_africana_DSM_8902.fasta	9.7
Brachyspira_hampsonii_30446.fasta	Spirochaeta_africana_DSM_8902.fasta	10.39
Brachyspira_hyodysenteriae_ATCC_27164.fasta	Spirochaeta_africana_DSM_8902.fasta	10.46
Brachyspira_innocens_ATCC_29796.fasta	Spirochaeta_africana_DSM_8902.fasta	10.29
Brachyspira_intermedia_PWS_A.fasta	Spirochaeta_africana_DSM_8902.fasta	10.18
Brachyspira_murdochii_DSM_12563.fasta	Spirochaeta_africana_DSM_8902.fasta	10.3
Brachyspira_pilosicoli_P43_6_78.fasta	Spirochaeta_africana_DSM_8902.fasta	10.45
Brachyspira_suanatina.fasta	Spirochaeta_africana_DSM_8902.fasta	10.38
Brachyspira_alvinipulli_ATCC_51933.fasta	Spirochaeta_americana_ASpG1.fasta	10.49
Brachyspira_hampsonii_30446.fasta	Spirochaeta_americana_ASpG1.fasta	11.75
Brachyspira_hyodysenteriae_ATCC_27164.fasta	Spirochaeta_americana_ASpG1.fasta	10.82
Brachyspira_innocens_ATCC_29796.fasta	Spirochaeta_americana_ASpG1.fasta	11.39
Brachyspira_intermedia_PWS_A.fasta	Spirochaeta_americana_ASpG1.fasta	10.89
Brachyspira_murdochii_DSM_12563.fasta	Spirochaeta_americana_ASpG1.fasta	11.17
Brachyspira_pilosicoli_P43_6_78.fasta	Spirochaeta_americana_ASpG1.fasta	10.93
Brachyspira_suanatina.fasta	Spirochaeta_americana_ASpG1.fasta	11.05
Brachyspira_alvinipulli_ATCC_51933.fasta	Spirochaeta_cellobiosiphila_DSM_17781.fasta	11.26
Brachyspira_hampsonii_30446.fasta	Spirochaeta_cellobiosiphila_DSM_17781.fasta	11.57
Brachyspira_hyodysenteriae_ATCC_27164.fasta	Spirochaeta_cellobiosiphila_DSM_17781.fasta	11.45
Brachyspira_innocens_ATCC_29796.fasta	Spirochaeta_cellobiosiphila_DSM_17781.fasta	11.4
Brachyspira_intermedia_PWS_A.fasta	Spirochaeta_cellobiosiphila_DSM_17781.fasta	11
Brachyspira_murdochii_DSM_12563.fasta	Spirochaeta_cellobiosiphila_DSM_17781.fasta	11.23
Brachyspira_pilosicoli_P43_6_78.fasta	Spirochaeta_cellobiosiphila_DSM_17781.fasta	11.21
Brachyspira_suanatina.fasta	Spirochaeta_cellobiosiphila_DSM_17781.fasta	11.37
Brachyspira_alvinipulli_ATCC_51933.fasta	Spirochaeta_lutea.fasta	10.35
Brachyspira_hampsonii_30446.fasta	Spirochaeta_lutea.fasta	10.91
Brachyspira_hyodysenteriae_ATCC_27164.fasta	Spirochaeta_lutea.fasta	10.88
Brachyspira_innocens_ATCC_29796.fasta	Spirochaeta_lutea.fasta	10.99
Brachyspira_intermedia_PWS_A.fasta	Spirochaeta_lutea.fasta	10.63
Brachyspira_murdochii_DSM_12563.fasta	Spirochaeta_lutea.fasta	10.66
Brachyspira_pilosicoli_P43_6_78.fasta	Spirochaeta_lutea.fasta	10.76
Brachyspira_suanatina.fasta	Spirochaeta_lutea.fasta	10.72
Brachyspira_alvinipulli_ATCC_51933.fasta	Spirochaeta_thermophila_DSM_6578.fasta	12.06
Brachyspira_hampsonii_30446.fasta	Spirochaeta_thermophila_DSM_6578.fasta	12.93
Brachyspira_hyodysenteriae_ATCC_27164.fasta	Spirochaeta_thermophila_DSM_6578.fasta	12.55
Brachyspira_innocens_ATCC_29796.fasta	Spirochaeta_thermophila_DSM_6578.fasta	12.85
Brachyspira_intermedia_PWS_A.fasta	Spirochaeta_thermophila_DSM_6578.fasta	12.56
Brachyspira_murdochii_DSM_12563.fasta	Spirochaeta_thermophila_DSM_6578.fasta	12.79
Brachyspira_pilosicoli_P43_6_78.fasta	Spirochaeta_thermophila_DSM_6578.fasta	13.29
Brachyspira_suanatina.fasta	Spirochaeta_thermophila_DSM_6578.fasta	12.52
Spirochaeta_africana_DSM_8902.fasta	Brachyspira_alvinipulli_ATCC_51933.fasta	9.7
Spirochaeta_americana_ASpG1.fasta	Brachyspira_alvinipulli_ATCC_51933.fasta	10.49
Spirochaeta_cellobiosiphila_DSM_17781.fasta	Brachyspira_alvinipulli_ATCC_51933.fasta	11.26
Spirochaeta_lutea.fasta	Brachyspira_alvinipulli_ATCC_51933.fasta	10.35
Spirochaeta_thermophila_DSM_6578.fasta	Brachyspira_alvinipulli_ATCC_51933.fasta	12.06
Spirochaeta_africana_DSM_8902.fasta	Brachyspira_hampsonii_30446.fasta	10.39
Spirochaeta_americana_ASpG1.fasta	Brachyspira_hampsonii_30446.fasta	11.75
Spirochaeta_cellobiosiphila_DSM_17781.fasta	Brachyspira_hampsonii_30446.fasta	11.57
Spirochaeta_lutea.fasta	Brachyspira_hampsonii_30446.fasta	10.91
Spirochaeta_thermophila_DSM_6578.fasta	Brachyspira_hampsonii_30446.fasta	12.93
Spirochaeta_africana_DSM_8902.fasta	Brachyspira_hyodysenteriae_ATCC_27164.fasta	10.46
Spirochaeta_americana_ASpG1.fasta	Brachyspira_hyodysenteriae_ATCC_27164.fasta	10.82
Spirochaeta_cellobiosiphila_DSM_17781.fasta	Brachyspira_hyodysenteriae_ATCC_27164.fasta	11.45
Spirochaeta_lutea.fasta	Brachyspira_hyodysenteriae_ATCC_27164.fasta	10.88
Spirochaeta_thermophila_DSM_6578.fasta	Brachyspira_hyodysenteriae_ATCC_27164.fasta	12.55
Spirochaeta_africana_DSM_8902.fasta	Brachyspira_innocens_ATCC_29796.fasta	10.29
Spirochaeta_americana_ASpG1.fasta	Brachyspira_innocens_ATCC_29796.fasta	11.39
Spirochaeta_cellobiosiphila_DSM_17781.fasta	Brachyspira_innocens_ATCC_29796.fasta	11.4
Spirochaeta_lutea.fasta	Brachyspira_innocens_ATCC_29796.fasta	10.99
Spirochaeta_thermophila_DSM_6578.fasta	Brachyspira_innocens_ATCC_29796.fasta	12.85
Spirochaeta_africana_DSM_8902.fasta	Brachyspira_intermedia_PWS_A.fasta	10.18
Spirochaeta_americana_ASpG1.fasta	Brachyspira_intermedia_PWS_A.fasta	10.89
Spirochaeta_cellobiosiphila_DSM_17781.fasta	Brachyspira_intermedia_PWS_A.fasta	11
Spirochaeta_lutea.fasta	Brachyspira_intermedia_PWS_A.fasta	10.63
Spirochaeta_thermophila_DSM_6578.fasta	Brachyspira_intermedia_PWS_A.fasta	12.56
Spirochaeta_africana_DSM_8902.fasta	Brachyspira_murdochii_DSM_12563.fasta	10.3
Spirochaeta_americana_ASpG1.fasta	Brachyspira_murdochii_DSM_12563.fasta	11.17
Spirochaeta_cellobiosiphila_DSM_17781.fasta	Brachyspira_murdochii_DSM_12563.fasta	11.23
Spirochaeta_lutea.fasta	Brachyspira_murdochii_DSM_12563.fasta	10.66
Spirochaeta_thermophila_DSM_6578.fasta	Brachyspira_murdochii_DSM_12563.fasta	12.79
Spirochaeta_africana_DSM_8902.fasta	Brachyspira_pilosicoli_P43_6_78.fasta	10.45
Spirochaeta_americana_ASpG1.fasta	Brachyspira_pilosicoli_P43_6_78.fasta	10.93
Spirochaeta_cellobiosiphila_DSM_17781.fasta	Brachyspira_pilosicoli_P43_6_78.fasta	11.21
Spirochaeta_lutea.fasta	Brachyspira_pilosicoli_P43_6_78.fasta	10.76
Spirochaeta_thermophila_DSM_6578.fasta	Brachyspira_pilosicoli_P43_6_78.fasta	13.29
Spirochaeta_africana_DSM_8902.fasta	Brachyspira_suanatina.fasta	10.38
Spirochaeta_americana_ASpG1.fasta	Brachyspira_suanatina.fasta	11.05
Spirochaeta_cellobiosiphila_DSM_17781.fasta	Brachyspira_suanatina.fasta	11.37
Spirochaeta_lutea.fasta	Brachyspira_suanatina.fasta	10.72
Spirochaeta_thermophila_DSM_6578.fasta	Brachyspira_suanatina.fasta	12.52
Leptospira_alexanderi_serovar_Manhao_3_str_L_60.fasta	Brachyspira_alvinipulli_ATCC_51933.fasta	8.08
Leptospira_alstonii.fasta	Brachyspira_alvinipulli_ATCC_51933.fasta	8.29
Leptospira_biflexa_serovar_Patoc_strain_Patoc_1_Paris.fasta	Brachyspira_alvinipulli_ATCC_51933.fasta	8.47
Leptospira_borgpetersenii_serovar_Hardjo_bovis_str_L550.fasta	Brachyspira_alvinipulli_ATCC_51933.fasta	8.68
Leptospira_broomii_serovar_Hurstbridge_str_5399.fasta	Brachyspira_alvinipulli_ATCC_51933.fasta	8.39
Leptospira_fainei_serovar_Hurstbridge_str_BUT_6.fasta	Brachyspira_alvinipulli_ATCC_51933.fasta	8.56
Leptospira_inadai_serovar_Lyme.fasta	Brachyspira_alvinipulli_ATCC_51933.fasta	8.04
Leptospira_interrogans_serovar_Lai_str_56601.fasta	Brachyspira_alvinipulli_ATCC_51933.fasta	8.94
Leptospira_kirschneri_serovar_Valbuzzi_str_200702274.fasta	Brachyspira_alvinipulli_ATCC_51933.fasta	8.78
Leptospira_kmetyi_serovar_Malaysia_str_Bejo_Iso9.fasta	Brachyspira_alvinipulli_ATCC_51933.fasta	8.3
Leptospira_licerasiae_serovar_Varillal_str_VAR_010.fasta	Brachyspira_alvinipulli_ATCC_51933.fasta	8.59
Leptospira_mayottensis_200901122.fasta	Brachyspira_alvinipulli_ATCC_51933.fasta	8.62
Leptospira_meyeri_serovar_Hardjo_str_Went_5.fasta	Brachyspira_alvinipulli_ATCC_51933.fasta	8.3
Leptospira_noguchii_serovar_Panama_str_CZ214.fasta	Brachyspira_alvinipulli_ATCC_51933.fasta	8.67
Leptospira_santarosai_serovar_Shermani_str_LT_821.fasta	Brachyspira_alvinipulli_ATCC_51933.fasta	8.26
Leptospira_terpstrae_serovar_Hualin_str_LT_11_33.fasta	Brachyspira_alvinipulli_ATCC_51933.fasta	8.67
Leptospira_vanthielii_serovar_Holland_str_Waz_Holland.fasta	Brachyspira_alvinipulli_ATCC_51933.fasta	8.41
Leptospira_weilii_serovar_Topaz_str_LT2116.fasta	Brachyspira_alvinipulli_ATCC_51933.fasta	8.05
Leptospira_wolbachii_serovar_Codice_str_CDC.fasta	Brachyspira_alvinipulli_ATCC_51933.fasta	8.44
Leptospira_wolffii_serovar_Khorat_str_Khorat_H2.fasta	Brachyspira_alvinipulli_ATCC_51933.fasta	8.38
Leptospira_yanagawae_serovar_Saopaulo_str_Sao_Paulo.fasta	Brachyspira_alvinipulli_ATCC_51933.fasta	8.32
Leptospira_alexanderi_serovar_Manhao_3_str_L_60.fasta	Brachyspira_hampsonii_30446.fasta	9.06
Leptospira_alstonii.fasta	Brachyspira_hampsonii_30446.fasta	8.8
Leptospira_biflexa_serovar_Patoc_strain_Patoc_1_Paris.fasta	Brachyspira_hampsonii_30446.fasta	9.3
Leptospira_borgpetersenii_serovar_Hardjo_bovis_str_L550.fasta	Brachyspira_hampsonii_30446.fasta	9.61
Leptospira_broomii_serovar_Hurstbridge_str_5399.fasta	Brachyspira_hampsonii_30446.fasta	8.76
Leptospira_fainei_serovar_Hurstbridge_str_BUT_6.fasta	Brachyspira_hampsonii_30446.fasta	9.09
Leptospira_inadai_serovar_Lyme.fasta	Brachyspira_hampsonii_30446.fasta	8.53
Leptospira_interrogans_serovar_Lai_str_56601.fasta	Brachyspira_hampsonii_30446.fasta	9.49
Leptospira_kirschneri_serovar_Valbuzzi_str_200702274.fasta	Brachyspira_hampsonii_30446.fasta	9.66
Leptospira_kmetyi_serovar_Malaysia_str_Bejo_Iso9.fasta	Brachyspira_hampsonii_30446.fasta	8.96
Leptospira_licerasiae_serovar_Varillal_str_VAR_010.fasta	Brachyspira_hampsonii_30446.fasta	9.32
Leptospira_mayottensis_200901122.fasta	Brachyspira_hampsonii_30446.fasta	9.41
Leptospira_meyeri_serovar_Hardjo_str_Went_5.fasta	Brachyspira_hampsonii_30446.fasta	9.15
Leptospira_noguchii_serovar_Panama_str_CZ214.fasta	Brachyspira_hampsonii_30446.fasta	9.12
Leptospira_santarosai_serovar_Shermani_str_LT_821.fasta	Brachyspira_hampsonii_30446.fasta	8.97
Leptospira_terpstrae_serovar_Hualin_str_LT_11_33.fasta	Brachyspira_hampsonii_30446.fasta	9.36
Leptospira_vanthielii_serovar_Holland_str_Waz_Holland.fasta	Brachyspira_hampsonii_30446.fasta	9.23
Leptospira_weilii_serovar_Topaz_str_LT2116.fasta	Brachyspira_hampsonii_30446.fasta	8.89
Leptospira_wolbachii_serovar_Codice_str_CDC.fasta	Brachyspira_hampsonii_30446.fasta	9.24
Leptospira_wolffii_serovar_Khorat_str_Khorat_H2.fasta	Brachyspira_hampsonii_30446.fasta	8.95
Leptospira_yanagawae_serovar_Saopaulo_str_Sao_Paulo.fasta	Brachyspira_hampsonii_30446.fasta	9.02
Leptospira_alexanderi_serovar_Manhao_3_str_L_60.fasta	Brachyspira_hyodysenteriae_ATCC_27164.fasta	8.89
Leptospira_alstonii.fasta	Brachyspira_hyodysenteriae_ATCC_27164.fasta	8.74
Leptospira_biflexa_serovar_Patoc_strain_Patoc_1_Paris.fasta	Brachyspira_hyodysenteriae_ATCC_27164.fasta	8.94
Leptospira_borgpetersenii_serovar_Hardjo_bovis_str_L550.fasta	Brachyspira_hyodysenteriae_ATCC_27164.fasta	9.32
Leptospira_broomii_serovar_Hurstbridge_str_5399.fasta	Brachyspira_hyodysenteriae_ATCC_27164.fasta	8.66
Leptospira_fainei_serovar_Hurstbridge_str_BUT_6.fasta	Brachyspira_hyodysenteriae_ATCC_27164.fasta	8.86
Leptospira_inadai_serovar_Lyme.fasta	Brachyspira_hyodysenteriae_ATCC_27164.fasta	8.42
Leptospira_interrogans_serovar_Lai_str_56601.fasta	Brachyspira_hyodysenteriae_ATCC_27164.fasta	9.59
Leptospira_kirschneri_serovar_Valbuzzi_str_200702274.fasta	Brachyspira_hyodysenteriae_ATCC_27164.fasta	9.55
Leptospira_kmetyi_serovar_Malaysia_str_Bejo_Iso9.fasta	Brachyspira_hyodysenteriae_ATCC_27164.fasta	8.8
Leptospira_licerasiae_serovar_Varillal_str_VAR_010.fasta	Brachyspira_hyodysenteriae_ATCC_27164.fasta	9.11
Leptospira_mayottensis_200901122.fasta	Brachyspira_hyodysenteriae_ATCC_27164.fasta	8.94
Leptospira_meyeri_serovar_Hardjo_str_Went_5.fasta	Brachyspira_hyodysenteriae_ATCC_27164.fasta	8.73
Leptospira_noguchii_serovar_Panama_str_CZ214.fasta	Brachyspira_hyodysenteriae_ATCC_27164.fasta	9.08
Leptospira_santarosai_serovar_Shermani_str_LT_821.fasta	Brachyspira_hyodysenteriae_ATCC_27164.fasta	9.11
Leptospira_terpstrae_serovar_Hualin_str_LT_11_33.fasta	Brachyspira_hyodysenteriae_ATCC_27164.fasta	9.14
Leptospira_vanthielii_serovar_Holland_str_Waz_Holland.fasta	Brachyspira_hyodysenteriae_ATCC_27164.fasta	8.84
Leptospira_weilii_serovar_Topaz_str_LT2116.fasta	Brachyspira_hyodysenteriae_ATCC_27164.fasta	8.75
Leptospira_wolbachii_serovar_Codice_str_CDC.fasta	Brachyspira_hyodysenteriae_ATCC_27164.fasta	8.93
Leptospira_wolffii_serovar_Khorat_str_Khorat_H2.fasta	Brachyspira_hyodysenteriae_ATCC_27164.fasta	8.92
Leptospira_yanagawae_serovar_Saopaulo_str_Sao_Paulo.fasta	Brachyspira_hyodysenteriae_ATCC_27164.fasta	8.81
Leptospira_alexanderi_serovar_Manhao_3_str_L_60.fasta	Brachyspira_innocens_ATCC_29796.fasta	8.78
Leptospira_alstonii.fasta	Brachyspira_innocens_ATCC_29796.fasta	8.57
Leptospira_biflexa_serovar_Patoc_strain_Patoc_1_Paris.fasta	Brachyspira_innocens_ATCC_29796.fasta	8.8
Leptospira_borgpetersenii_serovar_Hardjo_bovis_str_L550.fasta	Brachyspira_innocens_ATCC_29796.fasta	9.26
Leptospira_broomii_serovar_Hurstbridge_str_5399.fasta	Brachyspira_innocens_ATCC_29796.fasta	8.84
Leptospira_fainei_serovar_Hurstbridge_str_BUT_6.fasta	Brachyspira_innocens_ATCC_29796.fasta	8.98
Leptospira_inadai_serovar_Lyme.fasta	Brachyspira_innocens_ATCC_29796.fasta	8.45
Leptospira_interrogans_serovar_Lai_str_56601.fasta	Brachyspira_innocens_ATCC_29796.fasta	9.13
Leptospira_kirschneri_serovar_Valbuzzi_str_200702274.fasta	Brachyspira_innocens_ATCC_29796.fasta	9.27
Leptospira_kmetyi_serovar_Malaysia_str_Bejo_Iso9.fasta	Brachyspira_innocens_ATCC_29796.fasta	8.73
Leptospira_licerasiae_serovar_Varillal_str_VAR_010.fasta	Brachyspira_innocens_ATCC_29796.fasta	9.03
Leptospira_mayottensis_200901122.fasta	Brachyspira_innocens_ATCC_29796.fasta	9.01
Leptospira_meyeri_serovar_Hardjo_str_Went_5.fasta	Brachyspira_innocens_ATCC_29796.fasta	8.44
Leptospira_noguchii_serovar_Panama_str_CZ214.fasta	Brachyspira_innocens_ATCC_29796.fasta	9.01
Leptospira_santarosai_serovar_Shermani_str_LT_821.fasta	Brachyspira_innocens_ATCC_29796.fasta	8.93
Leptospira_terpstrae_serovar_Hualin_str_LT_11_33.fasta	Brachyspira_innocens_ATCC_29796.fasta	8.98
Leptospira_vanthielii_serovar_Holland_str_Waz_Holland.fasta	Brachyspira_innocens_ATCC_29796.fasta	8.79
Leptospira_weilii_serovar_Topaz_str_LT2116.fasta	Brachyspira_innocens_ATCC_29796.fasta	8.61
Leptospira_wolbachii_serovar_Codice_str_CDC.fasta	Brachyspira_innocens_ATCC_29796.fasta	8.68
Leptospira_wolffii_serovar_Khorat_str_Khorat_H2.fasta	Brachyspira_innocens_ATCC_29796.fasta	8.65
Leptospira_yanagawae_serovar_Saopaulo_str_Sao_Paulo.fasta	Brachyspira_innocens_ATCC_29796.fasta	8.75
Leptospira_alexanderi_serovar_Manhao_3_str_L_60.fasta	Brachyspira_intermedia_PWS_A.fasta	8.63
Leptospira_alstonii.fasta	Brachyspira_intermedia_PWS_A.fasta	8.56
Leptospira_biflexa_serovar_Patoc_strain_Patoc_1_Paris.fasta	Brachyspira_intermedia_PWS_A.fasta	8.9
Leptospira_borgpetersenii_serovar_Hardjo_bovis_str_L550.fasta	Brachyspira_intermedia_PWS_A.fasta	9.09
Leptospira_broomii_serovar_Hurstbridge_str_5399.fasta	Brachyspira_intermedia_PWS_A.fasta	8.64
Leptospira_fainei_serovar_Hurstbridge_str_BUT_6.fasta	Brachyspira_intermedia_PWS_A.fasta	8.75
Leptospira_inadai_serovar_Lyme.fasta	Brachyspira_intermedia_PWS_A.fasta	8.32
Leptospira_interrogans_serovar_Lai_str_56601.fasta	Brachyspira_intermedia_PWS_A.fasta	9.2
Leptospira_kirschneri_serovar_Valbuzzi_str_200702274.fasta	Brachyspira_intermedia_PWS_A.fasta	9.18
Leptospira_kmetyi_serovar_Malaysia_str_Bejo_Iso9.fasta	Brachyspira_intermedia_PWS_A.fasta	8.65
Leptospira_licerasiae_serovar_Varillal_str_VAR_010.fasta	Brachyspira_intermedia_PWS_A.fasta	8.92
Leptospira_mayottensis_200901122.fasta	Brachyspira_intermedia_PWS_A.fasta	8.74
Leptospira_meyeri_serovar_Hardjo_str_Went_5.fasta	Brachyspira_intermedia_PWS_A.fasta	8.54
Leptospira_noguchii_serovar_Panama_str_CZ214.fasta	Brachyspira_intermedia_PWS_A.fasta	8.72
Leptospira_santarosai_serovar_Shermani_str_LT_821.fasta	Brachyspira_intermedia_PWS_A.fasta	8.83
Leptospira_terpstrae_serovar_Hualin_str_LT_11_33.fasta	Brachyspira_intermedia_PWS_A.fasta	8.64
Leptospira_vanthielii_serovar_Holland_str_Waz_Holland.fasta	Brachyspira_intermedia_PWS_A.fasta	8.66
Leptospira_weilii_serovar_Topaz_str_LT2116.fasta	Brachyspira_intermedia_PWS_A.fasta	8.42
Leptospira_wolbachii_serovar_Codice_str_CDC.fasta	Brachyspira_intermedia_PWS_A.fasta	8.69
Leptospira_wolffii_serovar_Khorat_str_Khorat_H2.fasta	Brachyspira_intermedia_PWS_A.fasta	8.66
Leptospira_yanagawae_serovar_Saopaulo_str_Sao_Paulo.fasta	Brachyspira_intermedia_PWS_A.fasta	8.59
Leptospira_alexanderi_serovar_Manhao_3_str_L_60.fasta	Brachyspira_murdochii_DSM_12563.fasta	8.96
Leptospira_alstonii.fasta	Brachyspira_murdochii_DSM_12563.fasta	8.68
Leptospira_biflexa_serovar_Patoc_strain_Patoc_1_Paris.fasta	Brachyspira_murdochii_DSM_12563.fasta	8.84
Leptospira_borgpetersenii_serovar_Hardjo_bovis_str_L550.fasta	Brachyspira_murdochii_DSM_12563.fasta	9.39
Leptospira_broomii_serovar_Hurstbridge_str_5399.fasta	Brachyspira_murdochii_DSM_12563.fasta	8.87
Leptospira_fainei_serovar_Hurstbridge_str_BUT_6.fasta	Brachyspira_murdochii_DSM_12563.fasta	8.96
Leptospira_inadai_serovar_Lyme.fasta	Brachyspira_murdochii_DSM_12563.fasta	8.63
Leptospira_interrogans_serovar_Lai_str_56601.fasta	Brachyspira_murdochii_DSM_12563.fasta	9.44
Leptospira_kirschneri_serovar_Valbuzzi_str_200702274.fasta	Brachyspira_murdochii_DSM_12563.fasta	9.56
Leptospira_kmetyi_serovar_Malaysia_str_Bejo_Iso9.fasta	Brachyspira_murdochii_DSM_12563.fasta	8.99
Leptospira_licerasiae_serovar_Varillal_str_VAR_010.fasta	Brachyspira_murdochii_DSM_12563.fasta	9.24
Leptospira_mayottensis_200901122.fasta	Brachyspira_murdochii_DSM_12563.fasta	9.36
Leptospira_meyeri_serovar_Hardjo_str_Went_5.fasta	Brachyspira_murdochii_DSM_12563.fasta	8.63
Leptospira_noguchii_serovar_Panama_str_CZ214.fasta	Brachyspira_murdochii_DSM_12563.fasta	9.07
Leptospira_santarosai_serovar_Shermani_str_LT_821.fasta	Brachyspira_murdochii_DSM_12563.fasta	8.78
Leptospira_terpstrae_serovar_Hualin_str_LT_11_33.fasta	Brachyspira_murdochii_DSM_12563.fasta	9.13
Leptospira_vanthielii_serovar_Holland_str_Waz_Holland.fasta	Brachyspira_murdochii_DSM_12563.fasta	9
Leptospira_weilii_serovar_Topaz_str_LT2116.fasta	Brachyspira_murdochii_DSM_12563.fasta	8.73
Leptospira_wolbachii_serovar_Codice_str_CDC.fasta	Brachyspira_murdochii_DSM_12563.fasta	9.03
Leptospira_wolffii_serovar_Khorat_str_Khorat_H2.fasta	Brachyspira_murdochii_DSM_12563.fasta	8.76
Leptospira_yanagawae_serovar_Saopaulo_str_Sao_Paulo.fasta	Brachyspira_murdochii_DSM_12563.fasta	8.82
Leptospira_alexanderi_serovar_Manhao_3_str_L_60.fasta	Brachyspira_pilosicoli_P43_6_78.fasta	8.59
Leptospira_alstonii.fasta	Brachyspira_pilosicoli_P43_6_78.fasta	8.27
Leptospira_biflexa_serovar_Patoc_strain_Patoc_1_Paris.fasta	Brachyspira_pilosicoli_P43_6_78.fasta	8.42
Leptospira_borgpetersenii_serovar_Hardjo_bovis_str_L550.fasta	Brachyspira_pilosicoli_P43_6_78.fasta	9.04
Leptospira_broomii_serovar_Hurstbridge_str_5399.fasta	Brachyspira_pilosicoli_P43_6_78.fasta	8.42
Leptospira_fainei_serovar_Hurstbridge_str_BUT_6.fasta	Brachyspira_pilosicoli_P43_6_78.fasta	8.55
Leptospira_inadai_serovar_Lyme.fasta	Brachyspira_pilosicoli_P43_6_78.fasta	8.07
Leptospira_interrogans_serovar_Lai_str_56601.fasta	Brachyspira_pilosicoli_P43_6_78.fasta	8.99
Leptospira_kirschneri_serovar_Valbuzzi_str_200702274.fasta	Brachyspira_pilosicoli_P43_6_78.fasta	9.13
Leptospira_kmetyi_serovar_Malaysia_str_Bejo_Iso9.fasta	Brachyspira_pilosicoli_P43_6_78.fasta	8.61
Leptospira_licerasiae_serovar_Varillal_str_VAR_010.fasta	Brachyspira_pilosicoli_P43_6_78.fasta	8.61
Leptospira_mayottensis_200901122.fasta	Brachyspira_pilosicoli_P43_6_78.fasta	8.75
Leptospira_meyeri_serovar_Hardjo_str_Went_5.fasta	Brachyspira_pilosicoli_P43_6_78.fasta	8.37
Leptospira_noguchii_serovar_Panama_str_CZ214.fasta	Brachyspira_pilosicoli_P43_6_78.fasta	8.65
Leptospira_santarosai_serovar_Shermani_str_LT_821.fasta	Brachyspira_pilosicoli_P43_6_78.fasta	8.39
Leptospira_terpstrae_serovar_Hualin_str_LT_11_33.fasta	Brachyspira_pilosicoli_P43_6_78.fasta	8.4
Leptospira_vanthielii_serovar_Holland_str_Waz_Holland.fasta	Brachyspira_pilosicoli_P43_6_78.fasta	8.51
Leptospira_weilii_serovar_Topaz_str_LT2116.fasta	Brachyspira_pilosicoli_P43_6_78.fasta	8.72
Leptospira_wolbachii_serovar_Codice_str_CDC.fasta	Brachyspira_pilosicoli_P43_6_78.fasta	8.59
Leptospira_wolffii_serovar_Khorat_str_Khorat_H2.fasta	Brachyspira_pilosicoli_P43_6_78.fasta	8.62
Leptospira_yanagawae_serovar_Saopaulo_str_Sao_Paulo.fasta	Brachyspira_pilosicoli_P43_6_78.fasta	8.45
Leptospira_alexanderi_serovar_Manhao_3_str_L_60.fasta	Brachyspira_suanatina.fasta	8.69
Leptospira_alstonii.fasta	Brachyspira_suanatina.fasta	8.73
Leptospira_biflexa_serovar_Patoc_strain_Patoc_1_Paris.fasta	Brachyspira_suanatina.fasta	8.95
Leptospira_borgpetersenii_serovar_Hardjo_bovis_str_L550.fasta	Brachyspira_suanatina.fasta	9.32
Leptospira_broomii_serovar_Hurstbridge_str_5399.fasta	Brachyspira_suanatina.fasta	8.54
Leptospira_fainei_serovar_Hurstbridge_str_BUT_6.fasta	Brachyspira_suanatina.fasta	8.73
Leptospira_inadai_serovar_Lyme.fasta	Brachyspira_suanatina.fasta	8.2
Leptospira_interrogans_serovar_Lai_str_56601.fasta	Brachyspira_suanatina.fasta	9.32
Leptospira_kirschneri_serovar_Valbuzzi_str_200702274.fasta	Brachyspira_suanatina.fasta	9.29
Leptospira_kmetyi_serovar_Malaysia_str_Bejo_Iso9.fasta	Brachyspira_suanatina.fasta	8.54
Leptospira_licerasiae_serovar_Varillal_str_VAR_010.fasta	Brachyspira_suanatina.fasta	8.96
Leptospira_mayottensis_200901122.fasta	Brachyspira_suanatina.fasta	8.96
Leptospira_meyeri_serovar_Hardjo_str_Went_5.fasta	Brachyspira_suanatina.fasta	8.55
Leptospira_noguchii_serovar_Panama_str_CZ214.fasta	Brachyspira_suanatina.fasta	8.84
Leptospira_santarosai_serovar_Shermani_str_LT_821.fasta	Brachyspira_suanatina.fasta	8.75
Leptospira_terpstrae_serovar_Hualin_str_LT_11_33.fasta	Brachyspira_suanatina.fasta	8.89
Leptospira_vanthielii_serovar_Holland_str_Waz_Holland.fasta	Brachyspira_suanatina.fasta	8.63
Leptospira_weilii_serovar_Topaz_str_LT2116.fasta	Brachyspira_suanatina.fasta	8.46
Leptospira_wolbachii_serovar_Codice_str_CDC.fasta	Brachyspira_suanatina.fasta	8.64
Leptospira_wolffii_serovar_Khorat_str_Khorat_H2.fasta	Brachyspira_suanatina.fasta	8.82
Leptospira_yanagawae_serovar_Saopaulo_str_Sao_Paulo.fasta	Brachyspira_suanatina.fasta	8.49
Brachyspira_alvinipulli_ATCC_51933.fasta	Leptospira_alexanderi_serovar_Manhao_3_str_L_60.fasta	8.08
Brachyspira_hampsonii_30446.fasta	Leptospira_alexanderi_serovar_Manhao_3_str_L_60.fasta	9.06
Brachyspira_hyodysenteriae_ATCC_27164.fasta	Leptospira_alexanderi_serovar_Manhao_3_str_L_60.fasta	8.89
Brachyspira_innocens_ATCC_29796.fasta	Leptospira_alexanderi_serovar_Manhao_3_str_L_60.fasta	8.78
Brachyspira_intermedia_PWS_A.fasta	Leptospira_alexanderi_serovar_Manhao_3_str_L_60.fasta	8.63
Brachyspira_murdochii_DSM_12563.fasta	Leptospira_alexanderi_serovar_Manhao_3_str_L_60.fasta	8.96
Brachyspira_pilosicoli_P43_6_78.fasta	Leptospira_alexanderi_serovar_Manhao_3_str_L_60.fasta	8.59
Brachyspira_suanatina.fasta	Leptospira_alexanderi_serovar_Manhao_3_str_L_60.fasta	8.69
Brachyspira_alvinipulli_ATCC_51933.fasta	Leptospira_alstonii.fasta	8.29
Brachyspira_hampsonii_30446.fasta	Leptospira_alstonii.fasta	8.8
Brachyspira_hyodysenteriae_ATCC_27164.fasta	Leptospira_alstonii.fasta	8.74
Brachyspira_innocens_ATCC_29796.fasta	Leptospira_alstonii.fasta	8.57
Brachyspira_intermedia_PWS_A.fasta	Leptospira_alstonii.fasta	8.56
Brachyspira_murdochii_DSM_12563.fasta	Leptospira_alstonii.fasta	8.68
Brachyspira_pilosicoli_P43_6_78.fasta	Leptospira_alstonii.fasta	8.27
Brachyspira_suanatina.fasta	Leptospira_alstonii.fasta	8.73
Brachyspira_alvinipulli_ATCC_51933.fasta	Leptospira_biflexa_serovar_Patoc_strain_Patoc_1_Paris.fasta	8.47
Brachyspira_hampsonii_30446.fasta	Leptospira_biflexa_serovar_Patoc_strain_Patoc_1_Paris.fasta	9.3
Brachyspira_hyodysenteriae_ATCC_27164.fasta	Leptospira_biflexa_serovar_Patoc_strain_Patoc_1_Paris.fasta	8.94
Brachyspira_innocens_ATCC_29796.fasta	Leptospira_biflexa_serovar_Patoc_strain_Patoc_1_Paris.fasta	8.8
Brachyspira_intermedia_PWS_A.fasta	Leptospira_biflexa_serovar_Patoc_strain_Patoc_1_Paris.fasta	8.9
Brachyspira_murdochii_DSM_12563.fasta	Leptospira_biflexa_serovar_Patoc_strain_Patoc_1_Paris.fasta	8.84
Brachyspira_pilosicoli_P43_6_78.fasta	Leptospira_biflexa_serovar_Patoc_strain_Patoc_1_Paris.fasta	8.42
Brachyspira_suanatina.fasta	Leptospira_biflexa_serovar_Patoc_strain_Patoc_1_Paris.fasta	8.95
Brachyspira_alvinipulli_ATCC_51933.fasta	Leptospira_borgpetersenii_serovar_Hardjo_bovis_str_L550.fasta	8.68
Brachyspira_hampsonii_30446.fasta	Leptospira_borgpetersenii_serovar_Hardjo_bovis_str_L550.fasta	9.61
Brachyspira_hyodysenteriae_ATCC_27164.fasta	Leptospira_borgpetersenii_serovar_Hardjo_bovis_str_L550.fasta	9.32
Brachyspira_innocens_ATCC_29796.fasta	Leptospira_borgpetersenii_serovar_Hardjo_bovis_str_L550.fasta	9.26
Brachyspira_intermedia_PWS_A.fasta	Leptospira_borgpetersenii_serovar_Hardjo_bovis_str_L550.fasta	9.09
Brachyspira_murdochii_DSM_12563.fasta	Leptospira_borgpetersenii_serovar_Hardjo_bovis_str_L550.fasta	9.39
Brachyspira_pilosicoli_P43_6_78.fasta	Leptospira_borgpetersenii_serovar_Hardjo_bovis_str_L550.fasta	9.04
Brachyspira_suanatina.fasta	Leptospira_borgpetersenii_serovar_Hardjo_bovis_str_L550.fasta	9.32
Brachyspira_alvinipulli_ATCC_51933.fasta	Leptospira_broomii_serovar_Hurstbridge_str_5399.fasta	8.39
Brachyspira_hampsonii_30446.fasta	Leptospira_broomii_serovar_Hurstbridge_str_5399.fasta	8.76
Brachyspira_hyodysenteriae_ATCC_27164.fasta	Leptospira_broomii_serovar_Hurstbridge_str_5399.fasta	8.66
Brachyspira_innocens_ATCC_29796.fasta	Leptospira_broomii_serovar_Hurstbridge_str_5399.fasta	8.84
Brachyspira_intermedia_PWS_A.fasta	Leptospira_broomii_serovar_Hurstbridge_str_5399.fasta	8.64
Brachyspira_murdochii_DSM_12563.fasta	Leptospira_broomii_serovar_Hurstbridge_str_5399.fasta	8.87
Brachyspira_pilosicoli_P43_6_78.fasta	Leptospira_broomii_serovar_Hurstbridge_str_5399.fasta	8.42
Brachyspira_suanatina.fasta	Leptospira_broomii_serovar_Hurstbridge_str_5399.fasta	8.54
Brachyspira_alvinipulli_ATCC_51933.fasta	Leptospira_fainei_serovar_Hurstbridge_str_BUT_6.fasta	8.56
Brachyspira_hampsonii_30446.fasta	Leptospira_fainei_serovar_Hurstbridge_str_BUT_6.fasta	9.09
Brachyspira_hyodysenteriae_ATCC_27164.fasta	Leptospira_fainei_serovar_Hurstbridge_str_BUT_6.fasta	8.86
Brachyspira_innocens_ATCC_29796.fasta	Leptospira_fainei_serovar_Hurstbridge_str_BUT_6.fasta	8.98
Brachyspira_intermedia_PWS_A.fasta	Leptospira_fainei_serovar_Hurstbridge_str_BUT_6.fasta	8.75
Brachyspira_murdochii_DSM_12563.fasta	Leptospira_fainei_serovar_Hurstbridge_str_BUT_6.fasta	8.96
Brachyspira_pilosicoli_P43_6_78.fasta	Leptospira_fainei_serovar_Hurstbridge_str_BUT_6.fasta	8.55
Brachyspira_suanatina.fasta	Leptospira_fainei_serovar_Hurstbridge_str_BUT_6.fasta	8.73
Brachyspira_alvinipulli_ATCC_51933.fasta	Leptospira_inadai_serovar_Lyme.fasta	8.04
Brachyspira_hampsonii_30446.fasta	Leptospira_inadai_serovar_Lyme.fasta	8.53
Brachyspira_hyodysenteriae_ATCC_27164.fasta	Leptospira_inadai_serovar_Lyme.fasta	8.42
Brachyspira_innocens_ATCC_29796.fasta	Leptospira_inadai_serovar_Lyme.fasta	8.45
Brachyspira_intermedia_PWS_A.fasta	Leptospira_inadai_serovar_Lyme.fasta	8.32
Brachyspira_murdochii_DSM_12563.fasta	Leptospira_inadai_serovar_Lyme.fasta	8.63
Brachyspira_pilosicoli_P43_6_78.fasta	Leptospira_inadai_serovar_Lyme.fasta	8.07
Brachyspira_suanatina.fasta	Leptospira_inadai_serovar_Lyme.fasta	8.2
Brachyspira_alvinipulli_ATCC_51933.fasta	Leptospira_interrogans_serovar_Lai_str_56601.fasta	8.94
Brachyspira_hampsonii_30446.fasta	Leptospira_interrogans_serovar_Lai_str_56601.fasta	9.49
Brachyspira_hyodysenteriae_ATCC_27164.fasta	Leptospira_interrogans_serovar_Lai_str_56601.fasta	9.59
Brachyspira_innocens_ATCC_29796.fasta	Leptospira_interrogans_serovar_Lai_str_56601.fasta	9.13
Brachyspira_intermedia_PWS_A.fasta	Leptospira_interrogans_serovar_Lai_str_56601.fasta	9.2
Brachyspira_murdochii_DSM_12563.fasta	Leptospira_interrogans_serovar_Lai_str_56601.fasta	9.44
Brachyspira_pilosicoli_P43_6_78.fasta	Leptospira_interrogans_serovar_Lai_str_56601.fasta	8.99
Brachyspira_suanatina.fasta	Leptospira_interrogans_serovar_Lai_str_56601.fasta	9.32
Brachyspira_alvinipulli_ATCC_51933.fasta	Leptospira_kirschneri_serovar_Valbuzzi_str_200702274.fasta	8.78
Brachyspira_hampsonii_30446.fasta	Leptospira_kirschneri_serovar_Valbuzzi_str_200702274.fasta	9.66
Brachyspira_hyodysenteriae_ATCC_27164.fasta	Leptospira_kirschneri_serovar_Valbuzzi_str_200702274.fasta	9.55
Brachyspira_innocens_ATCC_29796.fasta	Leptospira_kirschneri_serovar_Valbuzzi_str_200702274.fasta	9.27
Brachyspira_intermedia_PWS_A.fasta	Leptospira_kirschneri_serovar_Valbuzzi_str_200702274.fasta	9.18
Brachyspira_murdochii_DSM_12563.fasta	Leptospira_kirschneri_serovar_Valbuzzi_str_200702274.fasta	9.56
Brachyspira_pilosicoli_P43_6_78.fasta	Leptospira_kirschneri_serovar_Valbuzzi_str_200702274.fasta	9.13
Brachyspira_suanatina.fasta	Leptospira_kirschneri_serovar_Valbuzzi_str_200702274.fasta	9.29
Brachyspira_alvinipulli_ATCC_51933.fasta	Leptospira_kmetyi_serovar_Malaysia_str_Bejo_Iso9.fasta	8.3
Brachyspira_hampsonii_30446.fasta	Leptospira_kmetyi_serovar_Malaysia_str_Bejo_Iso9.fasta	8.96
Brachyspira_hyodysenteriae_ATCC_27164.fasta	Leptospira_kmetyi_serovar_Malaysia_str_Bejo_Iso9.fasta	8.8
Brachyspira_innocens_ATCC_29796.fasta	Leptospira_kmetyi_serovar_Malaysia_str_Bejo_Iso9.fasta	8.73
Brachyspira_intermedia_PWS_A.fasta	Leptospira_kmetyi_serovar_Malaysia_str_Bejo_Iso9.fasta	8.65
Brachyspira_murdochii_DSM_12563.fasta	Leptospira_kmetyi_serovar_Malaysia_str_Bejo_Iso9.fasta	8.99
Brachyspira_pilosicoli_P43_6_78.fasta	Leptospira_kmetyi_serovar_Malaysia_str_Bejo_Iso9.fasta	8.61
Brachyspira_suanatina.fasta	Leptospira_kmetyi_serovar_Malaysia_str_Bejo_Iso9.fasta	8.54
Brachyspira_alvinipulli_ATCC_51933.fasta	Leptospira_licerasiae_serovar_Varillal_str_VAR_010.fasta	8.59
Brachyspira_hampsonii_30446.fasta	Leptospira_licerasiae_serovar_Varillal_str_VAR_010.fasta	9.32
Brachyspira_hyodysenteriae_ATCC_27164.fasta	Leptospira_licerasiae_serovar_Varillal_str_VAR_010.fasta	9.11
Brachyspira_innocens_ATCC_29796.fasta	Leptospira_licerasiae_serovar_Varillal_str_VAR_010.fasta	9.03
Brachyspira_intermedia_PWS_A.fasta	Leptospira_licerasiae_serovar_Varillal_str_VAR_010.fasta	8.92
Brachyspira_murdochii_DSM_12563.fasta	Leptospira_licerasiae_serovar_Varillal_str_VAR_010.fasta	9.24
Brachyspira_pilosicoli_P43_6_78.fasta	Leptospira_licerasiae_serovar_Varillal_str_VAR_010.fasta	8.61
Brachyspira_suanatina.fasta	Leptospira_licerasiae_serovar_Varillal_str_VAR_010.fasta	8.96
Brachyspira_alvinipulli_ATCC_51933.fasta	Leptospira_mayottensis_200901122.fasta	8.62
Brachyspira_hampsonii_30446.fasta	Leptospira_mayottensis_200901122.fasta	9.41
Brachyspira_hyodysenteriae_ATCC_27164.fasta	Leptospira_mayottensis_200901122.fasta	8.94
Brachyspira_innocens_ATCC_29796.fasta	Leptospira_mayottensis_200901122.fasta	9.01
Brachyspira_intermedia_PWS_A.fasta	Leptospira_mayottensis_200901122.fasta	8.74
Brachyspira_murdochii_DSM_12563.fasta	Leptospira_mayottensis_200901122.fasta	9.36
Brachyspira_pilosicoli_P43_6_78.fasta	Leptospira_mayottensis_200901122.fasta	8.75
Brachyspira_suanatina.fasta	Leptospira_mayottensis_200901122.fasta	8.96
Brachyspira_alvinipulli_ATCC_51933.fasta	Leptospira_meyeri_serovar_Hardjo_str_Went_5.fasta	8.3
Brachyspira_hampsonii_30446.fasta	Leptospira_meyeri_serovar_Hardjo_str_Went_5.fasta	9.15
Brachyspira_hyodysenteriae_ATCC_27164.fasta	Leptospira_meyeri_serovar_Hardjo_str_Went_5.fasta	8.73
Brachyspira_innocens_ATCC_29796.fasta	Leptospira_meyeri_serovar_Hardjo_str_Went_5.fasta	8.44
Brachyspira_intermedia_PWS_A.fasta	Leptospira_meyeri_serovar_Hardjo_str_Went_5.fasta	8.54
Brachyspira_murdochii_DSM_12563.fasta	Leptospira_meyeri_serovar_Hardjo_str_Went_5.fasta	8.63
Brachyspira_pilosicoli_P43_6_78.fasta	Leptospira_meyeri_serovar_Hardjo_str_Went_5.fasta	8.37
Brachyspira_suanatina.fasta	Leptospira_meyeri_serovar_Hardjo_str_Went_5.fasta	8.55
Brachyspira_alvinipulli_ATCC_51933.fasta	Leptospira_noguchii_serovar_Panama_str_CZ214.fasta	8.67
Brachyspira_hampsonii_30446.fasta	Leptospira_noguchii_serovar_Panama_str_CZ214.fasta	9.12
Brachyspira_hyodysenteriae_ATCC_27164.fasta	Leptospira_noguchii_serovar_Panama_str_CZ214.fasta	9.08
Brachyspira_innocens_ATCC_29796.fasta	Leptospira_noguchii_serovar_Panama_str_CZ214.fasta	9.01
Brachyspira_intermedia_PWS_A.fasta	Leptospira_noguchii_serovar_Panama_str_CZ214.fasta	8.72
Brachyspira_murdochii_DSM_12563.fasta	Leptospira_noguchii_serovar_Panama_str_CZ214.fasta	9.07
Brachyspira_pilosicoli_P43_6_78.fasta	Leptospira_noguchii_serovar_Panama_str_CZ214.fasta	8.65
Brachyspira_suanatina.fasta	Leptospira_noguchii_serovar_Panama_str_CZ214.fasta	8.84
Brachyspira_alvinipulli_ATCC_51933.fasta	Leptospira_santarosai_serovar_Shermani_str_LT_821.fasta	8.26
Brachyspira_hampsonii_30446.fasta	Leptospira_santarosai_serovar_Shermani_str_LT_821.fasta	8.97
Brachyspira_hyodysenteriae_ATCC_27164.fasta	Leptospira_santarosai_serovar_Shermani_str_LT_821.fasta	9.11
Brachyspira_innocens_ATCC_29796.fasta	Leptospira_santarosai_serovar_Shermani_str_LT_821.fasta	8.93
Brachyspira_intermedia_PWS_A.fasta	Leptospira_santarosai_serovar_Shermani_str_LT_821.fasta	8.83
Brachyspira_murdochii_DSM_12563.fasta	Leptospira_santarosai_serovar_Shermani_str_LT_821.fasta	8.78
Brachyspira_pilosicoli_P43_6_78.fasta	Leptospira_santarosai_serovar_Shermani_str_LT_821.fasta	8.39
Brachyspira_suanatina.fasta	Leptospira_santarosai_serovar_Shermani_str_LT_821.fasta	8.75
Brachyspira_alvinipulli_ATCC_51933.fasta	Leptospira_terpstrae_serovar_Hualin_str_LT_11_33.fasta	8.67
Brachyspira_hampsonii_30446.fasta	Leptospira_terpstrae_serovar_Hualin_str_LT_11_33.fasta	9.36
Brachyspira_hyodysenteriae_ATCC_27164.fasta	Leptospira_terpstrae_serovar_Hualin_str_LT_11_33.fasta	9.14
Brachyspira_innocens_ATCC_29796.fasta	Leptospira_terpstrae_serovar_Hualin_str_LT_11_33.fasta	8.98
Brachyspira_intermedia_PWS_A.fasta	Leptospira_terpstrae_serovar_Hualin_str_LT_11_33.fasta	8.64
Brachyspira_murdochii_DSM_12563.fasta	Leptospira_terpstrae_serovar_Hualin_str_LT_11_33.fasta	9.13
Brachyspira_pilosicoli_P43_6_78.fasta	Leptospira_terpstrae_serovar_Hualin_str_LT_11_33.fasta	8.4
Brachyspira_suanatina.fasta	Leptospira_terpstrae_serovar_Hualin_str_LT_11_33.fasta	8.89
Brachyspira_alvinipulli_ATCC_51933.fasta	Leptospira_vanthielii_serovar_Holland_str_Waz_Holland.fasta	8.41
Brachyspira_hampsonii_30446.fasta	Leptospira_vanthielii_serovar_Holland_str_Waz_Holland.fasta	9.23
Brachyspira_hyodysenteriae_ATCC_27164.fasta	Leptospira_vanthielii_serovar_Holland_str_Waz_Holland.fasta	8.84
Brachyspira_innocens_ATCC_29796.fasta	Leptospira_vanthielii_serovar_Holland_str_Waz_Holland.fasta	8.79
Brachyspira_intermedia_PWS_A.fasta	Leptospira_vanthielii_serovar_Holland_str_Waz_Holland.fasta	8.66
Brachyspira_murdochii_DSM_12563.fasta	Leptospira_vanthielii_serovar_Holland_str_Waz_Holland.fasta	9
Brachyspira_pilosicoli_P43_6_78.fasta	Leptospira_vanthielii_serovar_Holland_str_Waz_Holland.fasta	8.51
Brachyspira_suanatina.fasta	Leptospira_vanthielii_serovar_Holland_str_Waz_Holland.fasta	8.63
Brachyspira_alvinipulli_ATCC_51933.fasta	Leptospira_weilii_serovar_Topaz_str_LT2116.fasta	8.05
Brachyspira_hampsonii_30446.fasta	Leptospira_weilii_serovar_Topaz_str_LT2116.fasta	8.89
Brachyspira_hyodysenteriae_ATCC_27164.fasta	Leptospira_weilii_serovar_Topaz_str_LT2116.fasta	8.75
Brachyspira_innocens_ATCC_29796.fasta	Leptospira_weilii_serovar_Topaz_str_LT2116.fasta	8.61
Brachyspira_intermedia_PWS_A.fasta	Leptospira_weilii_serovar_Topaz_str_LT2116.fasta	8.42
Brachyspira_murdochii_DSM_12563.fasta	Leptospira_weilii_serovar_Topaz_str_LT2116.fasta	8.73
Brachyspira_pilosicoli_P43_6_78.fasta	Leptospira_weilii_serovar_Topaz_str_LT2116.fasta	8.72
Brachyspira_suanatina.fasta	Leptospira_weilii_serovar_Topaz_str_LT2116.fasta	8.46
Brachyspira_alvinipulli_ATCC_51933.fasta	Leptospira_wolbachii_serovar_Codice_str_CDC.fasta	8.44
Brachyspira_hampsonii_30446.fasta	Leptospira_wolbachii_serovar_Codice_str_CDC.fasta	9.24
Brachyspira_hyodysenteriae_ATCC_27164.fasta	Leptospira_wolbachii_serovar_Codice_str_CDC.fasta	8.93
Brachyspira_innocens_ATCC_29796.fasta	Leptospira_wolbachii_serovar_Codice_str_CDC.fasta	8.68
Brachyspira_intermedia_PWS_A.fasta	Leptospira_wolbachii_serovar_Codice_str_CDC.fasta	8.69
Brachyspira_murdochii_DSM_12563.fasta	Leptospira_wolbachii_serovar_Codice_str_CDC.fasta	9.03
Brachyspira_pilosicoli_P43_6_78.fasta	Leptospira_wolbachii_serovar_Codice_str_CDC.fasta	8.59
Brachyspira_suanatina.fasta	Leptospira_wolbachii_serovar_Codice_str_CDC.fasta	8.64
Brachyspira_alvinipulli_ATCC_51933.fasta	Leptospira_wolffii_serovar_Khorat_str_Khorat_H2.fasta	8.38
Brachyspira_hampsonii_30446.fasta	Leptospira_wolffii_serovar_Khorat_str_Khorat_H2.fasta	8.95
Brachyspira_hyodysenteriae_ATCC_27164.fasta	Leptospira_wolffii_serovar_Khorat_str_Khorat_H2.fasta	8.92
Brachyspira_innocens_ATCC_29796.fasta	Leptospira_wolffii_serovar_Khorat_str_Khorat_H2.fasta	8.65
Brachyspira_intermedia_PWS_A.fasta	Leptospira_wolffii_serovar_Khorat_str_Khorat_H2.fasta	8.66
Brachyspira_murdochii_DSM_12563.fasta	Leptospira_wolffii_serovar_Khorat_str_Khorat_H2.fasta	8.76
Brachyspira_pilosicoli_P43_6_78.fasta	Leptospira_wolffii_serovar_Khorat_str_Khorat_H2.fasta	8.62
Brachyspira_suanatina.fasta	Leptospira_wolffii_serovar_Khorat_str_Khorat_H2.fasta	8.82
Brachyspira_alvinipulli_ATCC_51933.fasta	Leptospira_yanagawae_serovar_Saopaulo_str_Sao_Paulo.fasta	8.32
Brachyspira_hampsonii_30446.fasta	Leptospira_yanagawae_serovar_Saopaulo_str_Sao_Paulo.fasta	9.02
Brachyspira_hyodysenteriae_ATCC_27164.fasta	Leptospira_yanagawae_serovar_Saopaulo_str_Sao_Paulo.fasta	8.81
Brachyspira_innocens_ATCC_29796.fasta	Leptospira_yanagawae_serovar_Saopaulo_str_Sao_Paulo.fasta	8.75
Brachyspira_intermedia_PWS_A.fasta	Leptospira_yanagawae_serovar_Saopaulo_str_Sao_Paulo.fasta	8.59
Brachyspira_murdochii_DSM_12563.fasta	Leptospira_yanagawae_serovar_Saopaulo_str_Sao_Paulo.fasta	8.82
Brachyspira_pilosicoli_P43_6_78.fasta	Leptospira_yanagawae_serovar_Saopaulo_str_Sao_Paulo.fasta	8.45
Brachyspira_suanatina.fasta	Leptospira_yanagawae_serovar_Saopaulo_str_Sao_Paulo.fasta	8.49
Treponema_azotonutricium_ZAS_9.fasta	Brachyspira_alvinipulli_ATCC_51933.fasta	12.76
Treponema_berlinense_ATCC_BAA_909.fasta	Brachyspira_alvinipulli_ATCC_51933.fasta	12.69
Treponema_brennaborense_DSM_12168.fasta	Brachyspira_alvinipulli_ATCC_51933.fasta	12.6
Treponema_bryantii_NK4A124.fasta	Brachyspira_alvinipulli_ATCC_51933.fasta	11.36
Treponema_caldarium_DSM_7334.fasta	Brachyspira_alvinipulli_ATCC_51933.fasta	13.3
Treponema_denticola_ATCC_35405.fasta	Brachyspira_alvinipulli_ATCC_51933.fasta	11.4
Treponema_lecithinolyticum_ATCC_700332.fasta	Brachyspira_alvinipulli_ATCC_51933.fasta	12.51
Treponema_maltophilum_ATCC_51939.fasta	Brachyspira_alvinipulli_ATCC_51933.fasta	12.26
Treponema_medium_ATCC_700293.fasta	Brachyspira_alvinipulli_ATCC_51933.fasta	11.91
Treponema_pallidum_subsp_pallidum_str_Sea_81_4.fasta	Brachyspira_alvinipulli_ATCC_51933.fasta	8.66
Treponema_paraluiscuniculi_Cuniculi_A.fasta	Brachyspira_alvinipulli_ATCC_51933.fasta	8.78
Treponema_pedis_str_T_A4.fasta	Brachyspira_alvinipulli_ATCC_51933.fasta	12.32
Treponema_phagedenis_4A.fasta	Brachyspira_alvinipulli_ATCC_51933.fasta	13.08
Treponema_porcinum.fasta	Brachyspira_alvinipulli_ATCC_51933.fasta	11.99
Treponema_primitia_ZAS_2.fasta	Brachyspira_alvinipulli_ATCC_51933.fasta	12.43
Treponema_putidum_strain_OMZ_758.fasta	Brachyspira_alvinipulli_ATCC_51933.fasta	12.7
Treponema_saccharophilum_DSM_2985.fasta	Brachyspira_alvinipulli_ATCC_51933.fasta	11.66
Treponema_socranskii_subsp_paredis_ATCC_35535.fasta	Brachyspira_alvinipulli_ATCC_51933.fasta	12.49
Treponema_succinifaciens_DSM_2489.fasta	Brachyspira_alvinipulli_ATCC_51933.fasta	11.5
Treponema_vincentii_F0403.fasta	Brachyspira_alvinipulli_ATCC_51933.fasta	12.62
Treponema_azotonutricium_ZAS_9.fasta	Brachyspira_hampsonii_30446.fasta	12.82
Treponema_berlinense_ATCC_BAA_909.fasta	Brachyspira_hampsonii_30446.fasta	13.38
Treponema_brennaborense_DSM_12168.fasta	Brachyspira_hampsonii_30446.fasta	13.61
Treponema_bryantii_NK4A124.fasta	Brachyspira_hampsonii_30446.fasta	11.66
Treponema_caldarium_DSM_7334.fasta	Brachyspira_hampsonii_30446.fasta	13.99
Treponema_denticola_ATCC_35405.fasta	Brachyspira_hampsonii_30446.fasta	11.9
Treponema_lecithinolyticum_ATCC_700332.fasta	Brachyspira_hampsonii_30446.fasta	13.42
Treponema_maltophilum_ATCC_51939.fasta	Brachyspira_hampsonii_30446.fasta	13.04
Treponema_medium_ATCC_700293.fasta	Brachyspira_hampsonii_30446.fasta	13.25
Treponema_pallidum_subsp_pallidum_str_Sea_81_4.fasta	Brachyspira_hampsonii_30446.fasta	9.71
Treponema_paraluiscuniculi_Cuniculi_A.fasta	Brachyspira_hampsonii_30446.fasta	9.98
Treponema_pedis_str_T_A4.fasta	Brachyspira_hampsonii_30446.fasta	12.41
Treponema_phagedenis_4A.fasta	Brachyspira_hampsonii_30446.fasta	14.08
Treponema_porcinum.fasta	Brachyspira_hampsonii_30446.fasta	12.7
Treponema_primitia_ZAS_2.fasta	Brachyspira_hampsonii_30446.fasta	13.2
Treponema_putidum_strain_OMZ_758.fasta	Brachyspira_hampsonii_30446.fasta	12.64
Treponema_saccharophilum_DSM_2985.fasta	Brachyspira_hampsonii_30446.fasta	12.27
Treponema_socranskii_subsp_paredis_ATCC_35535.fasta	Brachyspira_hampsonii_30446.fasta	13.49
Treponema_succinifaciens_DSM_2489.fasta	Brachyspira_hampsonii_30446.fasta	11.95
Treponema_vincentii_F0403.fasta	Brachyspira_hampsonii_30446.fasta	13.48
Treponema_azotonutricium_ZAS_9.fasta	Brachyspira_hyodysenteriae_ATCC_27164.fasta	12.67
Treponema_berlinense_ATCC_BAA_909.fasta	Brachyspira_hyodysenteriae_ATCC_27164.fasta	13.44
Treponema_brennaborense_DSM_12168.fasta	Brachyspira_hyodysenteriae_ATCC_27164.fasta	13.12
Treponema_bryantii_NK4A124.fasta	Brachyspira_hyodysenteriae_ATCC_27164.fasta	11.58
Treponema_caldarium_DSM_7334.fasta	Brachyspira_hyodysenteriae_ATCC_27164.fasta	13.6
Treponema_denticola_ATCC_35405.fasta	Brachyspira_hyodysenteriae_ATCC_27164.fasta	11.82
Treponema_lecithinolyticum_ATCC_700332.fasta	Brachyspira_hyodysenteriae_ATCC_27164.fasta	13.03
Treponema_maltophilum_ATCC_51939.fasta	Brachyspira_hyodysenteriae_ATCC_27164.fasta	12.88
Treponema_medium_ATCC_700293.fasta	Brachyspira_hyodysenteriae_ATCC_27164.fasta	13.13
Treponema_pallidum_subsp_pallidum_str_Sea_81_4.fasta	Brachyspira_hyodysenteriae_ATCC_27164.fasta	9.39
Treponema_paraluiscuniculi_Cuniculi_A.fasta	Brachyspira_hyodysenteriae_ATCC_27164.fasta	9.55
Treponema_pedis_str_T_A4.fasta	Brachyspira_hyodysenteriae_ATCC_27164.fasta	12.78
Treponema_phagedenis_4A.fasta	Brachyspira_hyodysenteriae_ATCC_27164.fasta	13.76
Treponema_porcinum.fasta	Brachyspira_hyodysenteriae_ATCC_27164.fasta	12.69
Treponema_primitia_ZAS_2.fasta	Brachyspira_hyodysenteriae_ATCC_27164.fasta	13
Treponema_putidum_strain_OMZ_758.fasta	Brachyspira_hyodysenteriae_ATCC_27164.fasta	12.9
Treponema_saccharophilum_DSM_2985.fasta	Brachyspira_hyodysenteriae_ATCC_27164.fasta	12.6
Treponema_socranskii_subsp_paredis_ATCC_35535.fasta	Brachyspira_hyodysenteriae_ATCC_27164.fasta	13.21
Treponema_succinifaciens_DSM_2489.fasta	Brachyspira_hyodysenteriae_ATCC_27164.fasta	11.96
Treponema_vincentii_F0403.fasta	Brachyspira_hyodysenteriae_ATCC_27164.fasta	13.38
Treponema_azotonutricium_ZAS_9.fasta	Brachyspira_innocens_ATCC_29796.fasta	12.9
Treponema_berlinense_ATCC_BAA_909.fasta	Brachyspira_innocens_ATCC_29796.fasta	13.15
Treponema_brennaborense_DSM_12168.fasta	Brachyspira_innocens_ATCC_29796.fasta	12.88
Treponema_bryantii_NK4A124.fasta	Brachyspira_innocens_ATCC_29796.fasta	11.38
Treponema_caldarium_DSM_7334.fasta	Brachyspira_innocens_ATCC_29796.fasta	13.83
Treponema_denticola_ATCC_35405.fasta	Brachyspira_innocens_ATCC_29796.fasta	11.8
Treponema_lecithinolyticum_ATCC_700332.fasta	Brachyspira_innocens_ATCC_29796.fasta	12.83
Treponema_maltophilum_ATCC_51939.fasta	Brachyspira_innocens_ATCC_29796.fasta	12.97
Treponema_medium_ATCC_700293.fasta	Brachyspira_innocens_ATCC_29796.fasta	13.35
Treponema_pallidum_subsp_pallidum_str_Sea_81_4.fasta	Brachyspira_innocens_ATCC_29796.fasta	9.15
Treponema_paraluiscuniculi_Cuniculi_A.fasta	Brachyspira_innocens_ATCC_29796.fasta	9.25
Treponema_pedis_str_T_A4.fasta	Brachyspira_innocens_ATCC_29796.fasta	12.74
Treponema_phagedenis_4A.fasta	Brachyspira_innocens_ATCC_29796.fasta	14.11
Treponema_porcinum.fasta	Brachyspira_innocens_ATCC_29796.fasta	12.34
Treponema_primitia_ZAS_2.fasta	Brachyspira_innocens_ATCC_29796.fasta	12.78
Treponema_putidum_strain_OMZ_758.fasta	Brachyspira_innocens_ATCC_29796.fasta	12.73
Treponema_saccharophilum_DSM_2985.fasta	Brachyspira_innocens_ATCC_29796.fasta	11.94
Treponema_socranskii_subsp_paredis_ATCC_35535.fasta	Brachyspira_innocens_ATCC_29796.fasta	13.15
Treponema_succinifaciens_DSM_2489.fasta	Brachyspira_innocens_ATCC_29796.fasta	11.92
Treponema_vincentii_F0403.fasta	Brachyspira_innocens_ATCC_29796.fasta	13.69
Treponema_azotonutricium_ZAS_9.fasta	Brachyspira_intermedia_PWS_A.fasta	12.65
Treponema_berlinense_ATCC_BAA_909.fasta	Brachyspira_intermedia_PWS_A.fasta	12.78
Treponema_brennaborense_DSM_12168.fasta	Brachyspira_intermedia_PWS_A.fasta	13.05
Treponema_bryantii_NK4A124.fasta	Brachyspira_intermedia_PWS_A.fasta	11.25
Treponema_caldarium_DSM_7334.fasta	Brachyspira_intermedia_PWS_A.fasta	13.35
Treponema_denticola_ATCC_35405.fasta	Brachyspira_intermedia_PWS_A.fasta	11.11
Treponema_lecithinolyticum_ATCC_700332.fasta	Brachyspira_intermedia_PWS_A.fasta	12.85
Treponema_maltophilum_ATCC_51939.fasta	Brachyspira_intermedia_PWS_A.fasta	12.67
Treponema_medium_ATCC_700293.fasta	Brachyspira_intermedia_PWS_A.fasta	12.75
Treponema_pallidum_subsp_pallidum_str_Sea_81_4.fasta	Brachyspira_intermedia_PWS_A.fasta	9.04
Treponema_paraluiscuniculi_Cuniculi_A.fasta	Brachyspira_intermedia_PWS_A.fasta	9.28
Treponema_pedis_str_T_A4.fasta	Brachyspira_intermedia_PWS_A.fasta	11.82
Treponema_phagedenis_4A.fasta	Brachyspira_intermedia_PWS_A.fasta	13.62
Treponema_porcinum.fasta	Brachyspira_intermedia_PWS_A.fasta	12.21
Treponema_primitia_ZAS_2.fasta	Brachyspira_intermedia_PWS_A.fasta	12.58
Treponema_putidum_strain_OMZ_758.fasta	Brachyspira_intermedia_PWS_A.fasta	12.18
Treponema_saccharophilum_DSM_2985.fasta	Brachyspira_intermedia_PWS_A.fasta	11.62
Treponema_socranskii_subsp_paredis_ATCC_35535.fasta	Brachyspira_intermedia_PWS_A.fasta	12.53
Treponema_succinifaciens_DSM_2489.fasta	Brachyspira_intermedia_PWS_A.fasta	11.6
Treponema_vincentii_F0403.fasta	Brachyspira_intermedia_PWS_A.fasta	13.34
Treponema_azotonutricium_ZAS_9.fasta	Brachyspira_murdochii_DSM_12563.fasta	12.75
Treponema_berlinense_ATCC_BAA_909.fasta	Brachyspira_murdochii_DSM_12563.fasta	13.5
Treponema_brennaborense_DSM_12168.fasta	Brachyspira_murdochii_DSM_12563.fasta	13.16
Treponema_bryantii_NK4A124.fasta	Brachyspira_murdochii_DSM_12563.fasta	11.55
Treponema_caldarium_DSM_7334.fasta	Brachyspira_murdochii_DSM_12563.fasta	13.73
Treponema_denticola_ATCC_35405.fasta	Brachyspira_murdochii_DSM_12563.fasta	11.77
Treponema_lecithinolyticum_ATCC_700332.fasta	Brachyspira_murdochii_DSM_12563.fasta	12.85
Treponema_maltophilum_ATCC_51939.fasta	Brachyspira_murdochii_DSM_12563.fasta	12.81
Treponema_medium_ATCC_700293.fasta	Brachyspira_murdochii_DSM_12563.fasta	13.18
Treponema_pallidum_subsp_pallidum_str_Sea_81_4.fasta	Brachyspira_murdochii_DSM_12563.fasta	9.34
Treponema_paraluiscuniculi_Cuniculi_A.fasta	Brachyspira_murdochii_DSM_12563.fasta	9.35
Treponema_pedis_str_T_A4.fasta	Brachyspira_murdochii_DSM_12563.fasta	13.03
Treponema_phagedenis_4A.fasta	Brachyspira_murdochii_DSM_12563.fasta	13.83
Treponema_porcinum.fasta	Brachyspira_murdochii_DSM_12563.fasta	12.63
Treponema_primitia_ZAS_2.fasta	Brachyspira_murdochii_DSM_12563.fasta	13.07
Treponema_putidum_strain_OMZ_758.fasta	Brachyspira_murdochii_DSM_12563.fasta	12.77
Treponema_saccharophilum_DSM_2985.fasta	Brachyspira_murdochii_DSM_12563.fasta	12.13
Treponema_socranskii_subsp_paredis_ATCC_35535.fasta	Brachyspira_murdochii_DSM_12563.fasta	13.27
Treponema_succinifaciens_DSM_2489.fasta	Brachyspira_murdochii_DSM_12563.fasta	11.82
Treponema_vincentii_F0403.fasta	Brachyspira_murdochii_DSM_12563.fasta	13.28
Treponema_azotonutricium_ZAS_9.fasta	Brachyspira_pilosicoli_P43_6_78.fasta	12.41
Treponema_berlinense_ATCC_BAA_909.fasta	Brachyspira_pilosicoli_P43_6_78.fasta	13.18
Treponema_brennaborense_DSM_12168.fasta	Brachyspira_pilosicoli_P43_6_78.fasta	13.4
Treponema_bryantii_NK4A124.fasta	Brachyspira_pilosicoli_P43_6_78.fasta	11.33
Treponema_caldarium_DSM_7334.fasta	Brachyspira_pilosicoli_P43_6_78.fasta	13.58
Treponema_denticola_ATCC_35405.fasta	Brachyspira_pilosicoli_P43_6_78.fasta	11.73
Treponema_lecithinolyticum_ATCC_700332.fasta	Brachyspira_pilosicoli_P43_6_78.fasta	13.71
Treponema_maltophilum_ATCC_51939.fasta	Brachyspira_pilosicoli_P43_6_78.fasta	13.3
Treponema_medium_ATCC_700293.fasta	Brachyspira_pilosicoli_P43_6_78.fasta	13.39
Treponema_pallidum_subsp_pallidum_str_Sea_81_4.fasta	Brachyspira_pilosicoli_P43_6_78.fasta	9.98
Treponema_paraluiscuniculi_Cuniculi_A.fasta	Brachyspira_pilosicoli_P43_6_78.fasta	10.09
Treponema_pedis_str_T_A4.fasta	Brachyspira_pilosicoli_P43_6_78.fasta	12.72
Treponema_phagedenis_4A.fasta	Brachyspira_pilosicoli_P43_6_78.fasta	13.97
Treponema_porcinum.fasta	Brachyspira_pilosicoli_P43_6_78.fasta	12.38
Treponema_primitia_ZAS_2.fasta	Brachyspira_pilosicoli_P43_6_78.fasta	12.94
Treponema_putidum_strain_OMZ_758.fasta	Brachyspira_pilosicoli_P43_6_78.fasta	12.53
Treponema_saccharophilum_DSM_2985.fasta	Brachyspira_pilosicoli_P43_6_78.fasta	11.87
Treponema_socranskii_subsp_paredis_ATCC_35535.fasta	Brachyspira_pilosicoli_P43_6_78.fasta	12.75
Treponema_succinifaciens_DSM_2489.fasta	Brachyspira_pilosicoli_P43_6_78.fasta	11.69
Treponema_vincentii_F0403.fasta	Brachyspira_pilosicoli_P43_6_78.fasta	13.23
Treponema_azotonutricium_ZAS_9.fasta	Brachyspira_suanatina.fasta	12.4
Treponema_berlinense_ATCC_BAA_909.fasta	Brachyspira_suanatina.fasta	13.21
Treponema_brennaborense_DSM_12168.fasta	Brachyspira_suanatina.fasta	12.86
Treponema_bryantii_NK4A124.fasta	Brachyspira_suanatina.fasta	11.16
Treponema_caldarium_DSM_7334.fasta	Brachyspira_suanatina.fasta	13.42
Treponema_denticola_ATCC_35405.fasta	Brachyspira_suanatina.fasta	11.34
Treponema_lecithinolyticum_ATCC_700332.fasta	Brachyspira_suanatina.fasta	12.78
Treponema_maltophilum_ATCC_51939.fasta	Brachyspira_suanatina.fasta	12.81
Treponema_medium_ATCC_700293.fasta	Brachyspira_suanatina.fasta	12.97
Treponema_pallidum_subsp_pallidum_str_Sea_81_4.fasta	Brachyspira_suanatina.fasta	9.26
Treponema_paraluiscuniculi_Cuniculi_A.fasta	Brachyspira_suanatina.fasta	9.43
Treponema_pedis_str_T_A4.fasta	Brachyspira_suanatina.fasta	12.04
Treponema_phagedenis_4A.fasta	Brachyspira_suanatina.fasta	13.76
Treponema_porcinum.fasta	Brachyspira_suanatina.fasta	12.48
Treponema_primitia_ZAS_2.fasta	Brachyspira_suanatina.fasta	12.65
Treponema_putidum_strain_OMZ_758.fasta	Brachyspira_suanatina.fasta	12.39
Treponema_saccharophilum_DSM_2985.fasta	Brachyspira_suanatina.fasta	12.05
Treponema_socranskii_subsp_paredis_ATCC_35535.fasta	Brachyspira_suanatina.fasta	12.68
Treponema_succinifaciens_DSM_2489.fasta	Brachyspira_suanatina.fasta	11.79
Treponema_vincentii_F0403.fasta	Brachyspira_suanatina.fasta	13.1
Brachyspira_alvinipulli_ATCC_51933.fasta	Treponema_azotonutricium_ZAS_9.fasta	12.76
Brachyspira_hampsonii_30446.fasta	Treponema_azotonutricium_ZAS_9.fasta	12.82
Brachyspira_hyodysenteriae_ATCC_27164.fasta	Treponema_azotonutricium_ZAS_9.fasta	12.67
Brachyspira_innocens_ATCC_29796.fasta	Treponema_azotonutricium_ZAS_9.fasta	12.9
Brachyspira_intermedia_PWS_A.fasta	Treponema_azotonutricium_ZAS_9.fasta	12.65
Brachyspira_murdochii_DSM_12563.fasta	Treponema_azotonutricium_ZAS_9.fasta	12.75
Brachyspira_pilosicoli_P43_6_78.fasta	Treponema_azotonutricium_ZAS_9.fasta	12.41
Brachyspira_suanatina.fasta	Treponema_azotonutricium_ZAS_9.fasta	12.4
Brachyspira_alvinipulli_ATCC_51933.fasta	Treponema_berlinense_ATCC_BAA_909.fasta	12.69
Brachyspira_hampsonii_30446.fasta	Treponema_berlinense_ATCC_BAA_909.fasta	13.38
Brachyspira_hyodysenteriae_ATCC_27164.fasta	Treponema_berlinense_ATCC_BAA_909.fasta	13.44
Brachyspira_innocens_ATCC_29796.fasta	Treponema_berlinense_ATCC_BAA_909.fasta	13.15
Brachyspira_intermedia_PWS_A.fasta	Treponema_berlinense_ATCC_BAA_909.fasta	12.78
Brachyspira_murdochii_DSM_12563.fasta	Treponema_berlinense_ATCC_BAA_909.fasta	13.5
Brachyspira_pilosicoli_P43_6_78.fasta	Treponema_berlinense_ATCC_BAA_909.fasta	13.18
Brachyspira_suanatina.fasta	Treponema_berlinense_ATCC_BAA_909.fasta	13.21
Brachyspira_alvinipulli_ATCC_51933.fasta	Treponema_brennaborense_DSM_12168.fasta	12.6
Brachyspira_hampsonii_30446.fasta	Treponema_brennaborense_DSM_12168.fasta	13.61
Brachyspira_hyodysenteriae_ATCC_27164.fasta	Treponema_brennaborense_DSM_12168.fasta	13.12
Brachyspira_innocens_ATCC_29796.fasta	Treponema_brennaborense_DSM_12168.fasta	12.88
Brachyspira_intermedia_PWS_A.fasta	Treponema_brennaborense_DSM_12168.fasta	13.05
Brachyspira_murdochii_DSM_12563.fasta	Treponema_brennaborense_DSM_12168.fasta	13.16
Brachyspira_pilosicoli_P43_6_78.fasta	Treponema_brennaborense_DSM_12168.fasta	13.4
Brachyspira_suanatina.fasta	Treponema_brennaborense_DSM_12168.fasta	12.86
Brachyspira_alvinipulli_ATCC_51933.fasta	Treponema_bryantii_NK4A124.fasta	11.36
Brachyspira_hampsonii_30446.fasta	Treponema_bryantii_NK4A124.fasta	11.66
Brachyspira_hyodysenteriae_ATCC_27164.fasta	Treponema_bryantii_NK4A124.fasta	11.58
Brachyspira_innocens_ATCC_29796.fasta	Treponema_bryantii_NK4A124.fasta	11.38
Brachyspira_intermedia_PWS_A.fasta	Treponema_bryantii_NK4A124.fasta	11.25
Brachyspira_murdochii_DSM_12563.fasta	Treponema_bryantii_NK4A124.fasta	11.55
Brachyspira_pilosicoli_P43_6_78.fasta	Treponema_bryantii_NK4A124.fasta	11.33
Brachyspira_suanatina.fasta	Treponema_bryantii_NK4A124.fasta	11.16
Brachyspira_alvinipulli_ATCC_51933.fasta	Treponema_caldarium_DSM_7334.fasta	13.3
Brachyspira_hampsonii_30446.fasta	Treponema_caldarium_DSM_7334.fasta	13.99
Brachyspira_hyodysenteriae_ATCC_27164.fasta	Treponema_caldarium_DSM_7334.fasta	13.6
Brachyspira_innocens_ATCC_29796.fasta	Treponema_caldarium_DSM_7334.fasta	13.83
Brachyspira_intermedia_PWS_A.fasta	Treponema_caldarium_DSM_7334.fasta	13.35
Brachyspira_murdochii_DSM_12563.fasta	Treponema_caldarium_DSM_7334.fasta	13.73
Brachyspira_pilosicoli_P43_6_78.fasta	Treponema_caldarium_DSM_7334.fasta	13.58
Brachyspira_suanatina.fasta	Treponema_caldarium_DSM_7334.fasta	13.42
Brachyspira_alvinipulli_ATCC_51933.fasta	Treponema_denticola_ATCC_35405.fasta	11.4
Brachyspira_hampsonii_30446.fasta	Treponema_denticola_ATCC_35405.fasta	11.9
Brachyspira_hyodysenteriae_ATCC_27164.fasta	Treponema_denticola_ATCC_35405.fasta	11.82
Brachyspira_innocens_ATCC_29796.fasta	Treponema_denticola_ATCC_35405.fasta	11.8
Brachyspira_intermedia_PWS_A.fasta	Treponema_denticola_ATCC_35405.fasta	11.11
Brachyspira_murdochii_DSM_12563.fasta	Treponema_denticola_ATCC_35405.fasta	11.77
Brachyspira_pilosicoli_P43_6_78.fasta	Treponema_denticola_ATCC_35405.fasta	11.73
Brachyspira_suanatina.fasta	Treponema_denticola_ATCC_35405.fasta	11.34
Brachyspira_alvinipulli_ATCC_51933.fasta	Treponema_lecithinolyticum_ATCC_700332.fasta	12.51
Brachyspira_hampsonii_30446.fasta	Treponema_lecithinolyticum_ATCC_700332.fasta	13.42
Brachyspira_hyodysenteriae_ATCC_27164.fasta	Treponema_lecithinolyticum_ATCC_700332.fasta	13.03
Brachyspira_innocens_ATCC_29796.fasta	Treponema_lecithinolyticum_ATCC_700332.fasta	12.83
Brachyspira_intermedia_PWS_A.fasta	Treponema_lecithinolyticum_ATCC_700332.fasta	12.85
Brachyspira_murdochii_DSM_12563.fasta	Treponema_lecithinolyticum_ATCC_700332.fasta	12.85
Brachyspira_pilosicoli_P43_6_78.fasta	Treponema_lecithinolyticum_ATCC_700332.fasta	13.71
Brachyspira_suanatina.fasta	Treponema_lecithinolyticum_ATCC_700332.fasta	12.78
Brachyspira_alvinipulli_ATCC_51933.fasta	Treponema_maltophilum_ATCC_51939.fasta	12.26
Brachyspira_hampsonii_30446.fasta	Treponema_maltophilum_ATCC_51939.fasta	13.04
Brachyspira_hyodysenteriae_ATCC_27164.fasta	Treponema_maltophilum_ATCC_51939.fasta	12.88
Brachyspira_innocens_ATCC_29796.fasta	Treponema_maltophilum_ATCC_51939.fasta	12.97
Brachyspira_intermedia_PWS_A.fasta	Treponema_maltophilum_ATCC_51939.fasta	12.67
Brachyspira_murdochii_DSM_12563.fasta	Treponema_maltophilum_ATCC_51939.fasta	12.81
Brachyspira_pilosicoli_P43_6_78.fasta	Treponema_maltophilum_ATCC_51939.fasta	13.3
Brachyspira_suanatina.fasta	Treponema_maltophilum_ATCC_51939.fasta	12.81
Brachyspira_alvinipulli_ATCC_51933.fasta	Treponema_medium_ATCC_700293.fasta	11.91
Brachyspira_hampsonii_30446.fasta	Treponema_medium_ATCC_700293.fasta	13.25
Brachyspira_hyodysenteriae_ATCC_27164.fasta	Treponema_medium_ATCC_700293.fasta	13.13
Brachyspira_innocens_ATCC_29796.fasta	Treponema_medium_ATCC_700293.fasta	13.35
Brachyspira_intermedia_PWS_A.fasta	Treponema_medium_ATCC_700293.fasta	12.75
Brachyspira_murdochii_DSM_12563.fasta	Treponema_medium_ATCC_700293.fasta	13.18
Brachyspira_pilosicoli_P43_6_78.fasta	Treponema_medium_ATCC_700293.fasta	13.39
Brachyspira_suanatina.fasta	Treponema_medium_ATCC_700293.fasta	12.97
Brachyspira_alvinipulli_ATCC_51933.fasta	Treponema_pallidum_subsp_pallidum_str_Sea_81_4.fasta	8.66
Brachyspira_hampsonii_30446.fasta	Treponema_pallidum_subsp_pallidum_str_Sea_81_4.fasta	9.71
Brachyspira_hyodysenteriae_ATCC_27164.fasta	Treponema_pallidum_subsp_pallidum_str_Sea_81_4.fasta	9.39
Brachyspira_innocens_ATCC_29796.fasta	Treponema_pallidum_subsp_pallidum_str_Sea_81_4.fasta	9.15
Brachyspira_intermedia_PWS_A.fasta	Treponema_pallidum_subsp_pallidum_str_Sea_81_4.fasta	9.04
Brachyspira_murdochii_DSM_12563.fasta	Treponema_pallidum_subsp_pallidum_str_Sea_81_4.fasta	9.34
Brachyspira_pilosicoli_P43_6_78.fasta	Treponema_pallidum_subsp_pallidum_str_Sea_81_4.fasta	9.98
Brachyspira_suanatina.fasta	Treponema_pallidum_subsp_pallidum_str_Sea_81_4.fasta	9.26
Brachyspira_alvinipulli_ATCC_51933.fasta	Treponema_paraluiscuniculi_Cuniculi_A.fasta	8.78
Brachyspira_hampsonii_30446.fasta	Treponema_paraluiscuniculi_Cuniculi_A.fasta	9.98
Brachyspira_hyodysenteriae_ATCC_27164.fasta	Treponema_paraluiscuniculi_Cuniculi_A.fasta	9.55
Brachyspira_innocens_ATCC_29796.fasta	Treponema_paraluiscuniculi_Cuniculi_A.fasta	9.25
Brachyspira_intermedia_PWS_A.fasta	Treponema_paraluiscuniculi_Cuniculi_A.fasta	9.28
Brachyspira_murdochii_DSM_12563.fasta	Treponema_paraluiscuniculi_Cuniculi_A.fasta	9.35
Brachyspira_pilosicoli_P43_6_78.fasta	Treponema_paraluiscuniculi_Cuniculi_A.fasta	10.09
Brachyspira_suanatina.fasta	Treponema_paraluiscuniculi_Cuniculi_A.fasta	9.43
Brachyspira_alvinipulli_ATCC_51933.fasta	Treponema_pedis_str_T_A4.fasta	12.32
Brachyspira_hampsonii_30446.fasta	Treponema_pedis_str_T_A4.fasta	12.41
Brachyspira_hyodysenteriae_ATCC_27164.fasta	Treponema_pedis_str_T_A4.fasta	12.78
Brachyspira_innocens_ATCC_29796.fasta	Treponema_pedis_str_T_A4.fasta	12.74
Brachyspira_intermedia_PWS_A.fasta	Treponema_pedis_str_T_A4.fasta	11.82
Brachyspira_murdochii_DSM_12563.fasta	Treponema_pedis_str_T_A4.fasta	13.03
Brachyspira_pilosicoli_P43_6_78.fasta	Treponema_pedis_str_T_A4.fasta	12.72
Brachyspira_suanatina.fasta	Treponema_pedis_str_T_A4.fasta	12.04
Brachyspira_alvinipulli_ATCC_51933.fasta	Treponema_phagedenis_4A.fasta	13.08
Brachyspira_hampsonii_30446.fasta	Treponema_phagedenis_4A.fasta	14.08
Brachyspira_hyodysenteriae_ATCC_27164.fasta	Treponema_phagedenis_4A.fasta	13.76
Brachyspira_innocens_ATCC_29796.fasta	Treponema_phagedenis_4A.fasta	14.11
Brachyspira_intermedia_PWS_A.fasta	Treponema_phagedenis_4A.fasta	13.62
Brachyspira_murdochii_DSM_12563.fasta	Treponema_phagedenis_4A.fasta	13.83
Brachyspira_pilosicoli_P43_6_78.fasta	Treponema_phagedenis_4A.fasta	13.97
Brachyspira_suanatina.fasta	Treponema_phagedenis_4A.fasta	13.76
Brachyspira_alvinipulli_ATCC_51933.fasta	Treponema_porcinum.fasta	11.99
Brachyspira_hampsonii_30446.fasta	Treponema_porcinum.fasta	12.7
Brachyspira_hyodysenteriae_ATCC_27164.fasta	Treponema_porcinum.fasta	12.69
Brachyspira_innocens_ATCC_29796.fasta	Treponema_porcinum.fasta	12.34
Brachyspira_intermedia_PWS_A.fasta	Treponema_porcinum.fasta	12.21
Brachyspira_murdochii_DSM_12563.fasta	Treponema_porcinum.fasta	12.63
Brachyspira_pilosicoli_P43_6_78.fasta	Treponema_porcinum.fasta	12.38
Brachyspira_suanatina.fasta	Treponema_porcinum.fasta	12.48
Brachyspira_alvinipulli_ATCC_51933.fasta	Treponema_primitia_ZAS_2.fasta	12.43
Brachyspira_hampsonii_30446.fasta	Treponema_primitia_ZAS_2.fasta	13.2
Brachyspira_hyodysenteriae_ATCC_27164.fasta	Treponema_primitia_ZAS_2.fasta	13
Brachyspira_innocens_ATCC_29796.fasta	Treponema_primitia_ZAS_2.fasta	12.78
Brachyspira_intermedia_PWS_A.fasta	Treponema_primitia_ZAS_2.fasta	12.58
Brachyspira_murdochii_DSM_12563.fasta	Treponema_primitia_ZAS_2.fasta	13.07
Brachyspira_pilosicoli_P43_6_78.fasta	Treponema_primitia_ZAS_2.fasta	12.94
Brachyspira_suanatina.fasta	Treponema_primitia_ZAS_2.fasta	12.65
Brachyspira_alvinipulli_ATCC_51933.fasta	Treponema_putidum_strain_OMZ_758.fasta	12.7
Brachyspira_hampsonii_30446.fasta	Treponema_putidum_strain_OMZ_758.fasta	12.64
Brachyspira_hyodysenteriae_ATCC_27164.fasta	Treponema_putidum_strain_OMZ_758.fasta	12.9
Brachyspira_innocens_ATCC_29796.fasta	Treponema_putidum_strain_OMZ_758.fasta	12.73
Brachyspira_intermedia_PWS_A.fasta	Treponema_putidum_strain_OMZ_758.fasta	12.18
Brachyspira_murdochii_DSM_12563.fasta	Treponema_putidum_strain_OMZ_758.fasta	12.77
Brachyspira_pilosicoli_P43_6_78.fasta	Treponema_putidum_strain_OMZ_758.fasta	12.53
Brachyspira_suanatina.fasta	Treponema_putidum_strain_OMZ_758.fasta	12.39
Brachyspira_alvinipulli_ATCC_51933.fasta	Treponema_saccharophilum_DSM_2985.fasta	11.66
Brachyspira_hampsonii_30446.fasta	Treponema_saccharophilum_DSM_2985.fasta	12.27
Brachyspira_hyodysenteriae_ATCC_27164.fasta	Treponema_saccharophilum_DSM_2985.fasta	12.6
Brachyspira_innocens_ATCC_29796.fasta	Treponema_saccharophilum_DSM_2985.fasta	11.94
Brachyspira_intermedia_PWS_A.fasta	Treponema_saccharophilum_DSM_2985.fasta	11.62
Brachyspira_murdochii_DSM_12563.fasta	Treponema_saccharophilum_DSM_2985.fasta	12.13
Brachyspira_pilosicoli_P43_6_78.fasta	Treponema_saccharophilum_DSM_2985.fasta	11.87
Brachyspira_suanatina.fasta	Treponema_saccharophilum_DSM_2985.fasta	12.05
Brachyspira_alvinipulli_ATCC_51933.fasta	Treponema_socranskii_subsp_paredis_ATCC_35535.fasta	12.49
Brachyspira_hampsonii_30446.fasta	Treponema_socranskii_subsp_paredis_ATCC_35535.fasta	13.49
Brachyspira_hyodysenteriae_ATCC_27164.fasta	Treponema_socranskii_subsp_paredis_ATCC_35535.fasta	13.21
Brachyspira_innocens_ATCC_29796.fasta	Treponema_socranskii_subsp_paredis_ATCC_35535.fasta	13.15
Brachyspira_intermedia_PWS_A.fasta	Treponema_socranskii_subsp_paredis_ATCC_35535.fasta	12.53
Brachyspira_murdochii_DSM_12563.fasta	Treponema_socranskii_subsp_paredis_ATCC_35535.fasta	13.27
Brachyspira_pilosicoli_P43_6_78.fasta	Treponema_socranskii_subsp_paredis_ATCC_35535.fasta	12.75
Brachyspira_suanatina.fasta	Treponema_socranskii_subsp_paredis_ATCC_35535.fasta	12.68
Brachyspira_alvinipulli_ATCC_51933.fasta	Treponema_succinifaciens_DSM_2489.fasta	11.5
Brachyspira_hampsonii_30446.fasta	Treponema_succinifaciens_DSM_2489.fasta	11.95
Brachyspira_hyodysenteriae_ATCC_27164.fasta	Treponema_succinifaciens_DSM_2489.fasta	11.96
Brachyspira_innocens_ATCC_29796.fasta	Treponema_succinifaciens_DSM_2489.fasta	11.92
Brachyspira_intermedia_PWS_A.fasta	Treponema_succinifaciens_DSM_2489.fasta	11.6
Brachyspira_murdochii_DSM_12563.fasta	Treponema_succinifaciens_DSM_2489.fasta	11.82
Brachyspira_pilosicoli_P43_6_78.fasta	Treponema_succinifaciens_DSM_2489.fasta	11.69
Brachyspira_suanatina.fasta	Treponema_succinifaciens_DSM_2489.fasta	11.79
Brachyspira_alvinipulli_ATCC_51933.fasta	Treponema_vincentii_F0403.fasta	12.62
Brachyspira_hampsonii_30446.fasta	Treponema_vincentii_F0403.fasta	13.48
Brachyspira_hyodysenteriae_ATCC_27164.fasta	Treponema_vincentii_F0403.fasta	13.38
Brachyspira_innocens_ATCC_29796.fasta	Treponema_vincentii_F0403.fasta	13.69
Brachyspira_intermedia_PWS_A.fasta	Treponema_vincentii_F0403.fasta	13.34
Brachyspira_murdochii_DSM_12563.fasta	Treponema_vincentii_F0403.fasta	13.28
Brachyspira_pilosicoli_P43_6_78.fasta	Treponema_vincentii_F0403.fasta	13.23
Brachyspira_suanatina.fasta	Treponema_vincentii_F0403.fasta	13.1
Brachyspira_alvinipulli_ATCC_51933.fasta	B_afzelii_PKo_proteome.fasta	7.99
Brachyspira_hampsonii_30446.fasta	B_afzelii_PKo_proteome.fasta	9.2
Brachyspira_hyodysenteriae_ATCC_27164.fasta	B_afzelii_PKo_proteome.fasta	8.99
Brachyspira_innocens_ATCC_29796.fasta	B_afzelii_PKo_proteome.fasta	8.69
Brachyspira_intermedia_PWS_A.fasta	B_afzelii_PKo_proteome.fasta	8.54
Brachyspira_murdochii_DSM_12563.fasta	B_afzelii_PKo_proteome.fasta	8.95
Brachyspira_pilosicoli_P43_6_78.fasta	B_afzelii_PKo_proteome.fasta	9.52
Brachyspira_suanatina.fasta	B_afzelii_PKo_proteome.fasta	8.48
Brachyspira_alvinipulli_ATCC_51933.fasta	B_americana_SCW41_proteome.fasta	8.68
Brachyspira_hampsonii_30446.fasta	B_americana_SCW41_proteome.fasta	9.66
Brachyspira_hyodysenteriae_ATCC_27164.fasta	B_americana_SCW41_proteome.fasta	9.5
Brachyspira_innocens_ATCC_29796.fasta	B_americana_SCW41_proteome.fasta	9.35
Brachyspira_intermedia_PWS_A.fasta	B_americana_SCW41_proteome.fasta	9.04
Brachyspira_murdochii_DSM_12563.fasta	B_americana_SCW41_proteome.fasta	9.29
Brachyspira_pilosicoli_P43_6_78.fasta	B_americana_SCW41_proteome.fasta	10.32
Brachyspira_suanatina.fasta	B_americana_SCW41_proteome.fasta	9.21
Brachyspira_alvinipulli_ATCC_51933.fasta	B_bavariensis_PBi_proteome.fasta	8.14
Brachyspira_hampsonii_30446.fasta	B_bavariensis_PBi_proteome.fasta	9.16
Brachyspira_hyodysenteriae_ATCC_27164.fasta	B_bavariensis_PBi_proteome.fasta	8.81
Brachyspira_innocens_ATCC_29796.fasta	B_bavariensis_PBi_proteome.fasta	8.81
Brachyspira_intermedia_PWS_A.fasta	B_bavariensis_PBi_proteome.fasta	8.38
Brachyspira_murdochii_DSM_12563.fasta	B_bavariensis_PBi_proteome.fasta	8.83
Brachyspira_pilosicoli_P43_6_78.fasta	B_bavariensis_PBi_proteome.fasta	9.51
Brachyspira_suanatina.fasta	B_bavariensis_PBi_proteome.fasta	8.47
Brachyspira_alvinipulli_ATCC_51933.fasta	B_bissettiae_DN127_proteome.fasta	7.91
Brachyspira_hampsonii_30446.fasta	B_bissettiae_DN127_proteome.fasta	8.72
Brachyspira_hyodysenteriae_ATCC_27164.fasta	B_bissettiae_DN127_proteome.fasta	8.64
Brachyspira_innocens_ATCC_29796.fasta	B_bissettiae_DN127_proteome.fasta	8.36
Brachyspira_intermedia_PWS_A.fasta	B_bissettiae_DN127_proteome.fasta	8.15
Brachyspira_murdochii_DSM_12563.fasta	B_bissettiae_DN127_proteome.fasta	8.51
Brachyspira_pilosicoli_P43_6_78.fasta	B_bissettiae_DN127_proteome.fasta	9.37
Brachyspira_suanatina.fasta	B_bissettiae_DN127_proteome.fasta	8.36
Brachyspira_alvinipulli_ATCC_51933.fasta	B_burgdorferi_B31_proteome.fasta	8.17
Brachyspira_hampsonii_30446.fasta	B_burgdorferi_B31_proteome.fasta	9.02
Brachyspira_hyodysenteriae_ATCC_27164.fasta	B_burgdorferi_B31_proteome.fasta	8.8
Brachyspira_innocens_ATCC_29796.fasta	B_burgdorferi_B31_proteome.fasta	8.61
Brachyspira_intermedia_PWS_A.fasta	B_burgdorferi_B31_proteome.fasta	8.36
Brachyspira_murdochii_DSM_12563.fasta	B_burgdorferi_B31_proteome.fasta	8.72
Brachyspira_pilosicoli_P43_6_78.fasta	B_burgdorferi_B31_proteome.fasta	9.63
Brachyspira_suanatina.fasta	B_burgdorferi_B31_proteome.fasta	8.52
Brachyspira_alvinipulli_ATCC_51933.fasta	B_californiensis_CA446_proteome.fasta	8.3
Brachyspira_hampsonii_30446.fasta	B_californiensis_CA446_proteome.fasta	9.46
Brachyspira_hyodysenteriae_ATCC_27164.fasta	B_californiensis_CA446_proteome.fasta	9.14
Brachyspira_innocens_ATCC_29796.fasta	B_californiensis_CA446_proteome.fasta	8.83
Brachyspira_intermedia_PWS_A.fasta	B_californiensis_CA446_proteome.fasta	8.64
Brachyspira_murdochii_DSM_12563.fasta	B_californiensis_CA446_proteome.fasta	9.05
Brachyspira_pilosicoli_P43_6_78.fasta	B_californiensis_CA446_proteome.fasta	10.02
Brachyspira_suanatina.fasta	B_californiensis_CA446_proteome.fasta	8.71
Brachyspira_alvinipulli_ATCC_51933.fasta	B_carolinensis_SCW22_proteome.fasta	8.24
Brachyspira_hampsonii_30446.fasta	B_carolinensis_SCW22_proteome.fasta	9.27
Brachyspira_hyodysenteriae_ATCC_27164.fasta	B_carolinensis_SCW22_proteome.fasta	9.15
Brachyspira_innocens_ATCC_29796.fasta	B_carolinensis_SCW22_proteome.fasta	8.81
Brachyspira_intermedia_PWS_A.fasta	B_carolinensis_SCW22_proteome.fasta	8.6
Brachyspira_murdochii_DSM_12563.fasta	B_carolinensis_SCW22_proteome.fasta	8.95
Brachyspira_pilosicoli_P43_6_78.fasta	B_carolinensis_SCW22_proteome.fasta	9.89
Brachyspira_suanatina.fasta	B_carolinensis_SCW22_proteome.fasta	8.82
Brachyspira_alvinipulli_ATCC_51933.fasta	B_chilensis_VA1_proteome.fasta	8.88
Brachyspira_hampsonii_30446.fasta	B_chilensis_VA1_proteome.fasta	10.35
Brachyspira_hyodysenteriae_ATCC_27164.fasta	B_chilensis_VA1_proteome.fasta	9.84
Brachyspira_innocens_ATCC_29796.fasta	B_chilensis_VA1_proteome.fasta	9.61
Brachyspira_intermedia_PWS_A.fasta	B_chilensis_VA1_proteome.fasta	9.31
Brachyspira_murdochii_DSM_12563.fasta	B_chilensis_VA1_proteome.fasta	9.91
Brachyspira_pilosicoli_P43_6_78.fasta	B_chilensis_VA1_proteome.fasta	11.03
Brachyspira_suanatina.fasta	B_chilensis_VA1_proteome.fasta	9.39
Brachyspira_alvinipulli_ATCC_51933.fasta	B_finlandensis_SV1_proteome.fasta	8.16
Brachyspira_hampsonii_30446.fasta	B_finlandensis_SV1_proteome.fasta	9.25
Brachyspira_hyodysenteriae_ATCC_27164.fasta	B_finlandensis_SV1_proteome.fasta	8.97
Brachyspira_innocens_ATCC_29796.fasta	B_finlandensis_SV1_proteome.fasta	8.89
Brachyspira_intermedia_PWS_A.fasta	B_finlandensis_SV1_proteome.fasta	8.56
Brachyspira_murdochii_DSM_12563.fasta	B_finlandensis_SV1_proteome.fasta	8.91
Brachyspira_pilosicoli_P43_6_78.fasta	B_finlandensis_SV1_proteome.fasta	9.95
Brachyspira_suanatina.fasta	B_finlandensis_SV1_proteome.fasta	8.78
Brachyspira_alvinipulli_ATCC_51933.fasta	B_garinii_20047_proteome.fasta	8.57
Brachyspira_hampsonii_30446.fasta	B_garinii_20047_proteome.fasta	9.51
Brachyspira_hyodysenteriae_ATCC_27164.fasta	B_garinii_20047_proteome.fasta	9.17
Brachyspira_innocens_ATCC_29796.fasta	B_garinii_20047_proteome.fasta	8.9
Brachyspira_intermedia_PWS_A.fasta	B_garinii_20047_proteome.fasta	8.67
Brachyspira_murdochii_DSM_12563.fasta	B_garinii_20047_proteome.fasta	9.1
Brachyspira_pilosicoli_P43_6_78.fasta	B_garinii_20047_proteome.fasta	9.83
Brachyspira_suanatina.fasta	B_garinii_20047_proteome.fasta	8.64
Brachyspira_alvinipulli_ATCC_51933.fasta	B_japonica_HO14_proteome.fasta	8.37
Brachyspira_hampsonii_30446.fasta	B_japonica_HO14_proteome.fasta	9.55
Brachyspira_hyodysenteriae_ATCC_27164.fasta	B_japonica_HO14_proteome.fasta	9.28
Brachyspira_innocens_ATCC_29796.fasta	B_japonica_HO14_proteome.fasta	9.06
Brachyspira_intermedia_PWS_A.fasta	B_japonica_HO14_proteome.fasta	8.64
Brachyspira_murdochii_DSM_12563.fasta	B_japonica_HO14_proteome.fasta	9.1
Brachyspira_pilosicoli_P43_6_78.fasta	B_japonica_HO14_proteome.fasta	10.06
Brachyspira_suanatina.fasta	B_japonica_HO14_proteome.fasta	8.79
Brachyspira_alvinipulli_ATCC_51933.fasta	B_kurtenbachii_25015_proteome.fasta	8.15
Brachyspira_hampsonii_30446.fasta	B_kurtenbachii_25015_proteome.fasta	9.48
Brachyspira_hyodysenteriae_ATCC_27164.fasta	B_kurtenbachii_25015_proteome.fasta	9.27
Brachyspira_innocens_ATCC_29796.fasta	B_kurtenbachii_25015_proteome.fasta	8.92
Brachyspira_intermedia_PWS_A.fasta	B_kurtenbachii_25015_proteome.fasta	8.66
Brachyspira_murdochii_DSM_12563.fasta	B_kurtenbachii_25015_proteome.fasta	9.04
Brachyspira_pilosicoli_P43_6_78.fasta	B_kurtenbachii_25015_proteome.fasta	10.07
Brachyspira_suanatina.fasta	B_kurtenbachii_25015_proteome.fasta	8.96
Brachyspira_alvinipulli_ATCC_51933.fasta	B_lusitaniae_PoTiB2_proteome.fasta	8.65
Brachyspira_hampsonii_30446.fasta	B_lusitaniae_PoTiB2_proteome.fasta	9.81
Brachyspira_hyodysenteriae_ATCC_27164.fasta	B_lusitaniae_PoTiB2_proteome.fasta	9.48
Brachyspira_innocens_ATCC_29796.fasta	B_lusitaniae_PoTiB2_proteome.fasta	9.12
Brachyspira_intermedia_PWS_A.fasta	B_lusitaniae_PoTiB2_proteome.fasta	8.86
Brachyspira_murdochii_DSM_12563.fasta	B_lusitaniae_PoTiB2_proteome.fasta	9.3
Brachyspira_pilosicoli_P43_6_78.fasta	B_lusitaniae_PoTiB2_proteome.fasta	10.34
Brachyspira_suanatina.fasta	B_lusitaniae_PoTiB2_proteome.fasta	9.01
Brachyspira_alvinipulli_ATCC_51933.fasta	B_mayonii_MN14-1420_proteome.fasta	8.36
Brachyspira_hampsonii_30446.fasta	B_mayonii_MN14-1420_proteome.fasta	9.3
Brachyspira_hyodysenteriae_ATCC_27164.fasta	B_mayonii_MN14-1420_proteome.fasta	9.2
Brachyspira_innocens_ATCC_29796.fasta	B_mayonii_MN14-1420_proteome.fasta	8.98
Brachyspira_intermedia_PWS_A.fasta	B_mayonii_MN14-1420_proteome.fasta	8.6
Brachyspira_murdochii_DSM_12563.fasta	B_mayonii_MN14-1420_proteome.fasta	9.15
Brachyspira_pilosicoli_P43_6_78.fasta	B_mayonii_MN14-1420_proteome.fasta	10.1
Brachyspira_suanatina.fasta	B_mayonii_MN14-1420_proteome.fasta	8.77
Brachyspira_alvinipulli_ATCC_51933.fasta	B_spielmanii_A14S_proteome.fasta	8.37
Brachyspira_hampsonii_30446.fasta	B_spielmanii_A14S_proteome.fasta	9.31
Brachyspira_hyodysenteriae_ATCC_27164.fasta	B_spielmanii_A14S_proteome.fasta	9.13
Brachyspira_innocens_ATCC_29796.fasta	B_spielmanii_A14S_proteome.fasta	8.82
Brachyspira_intermedia_PWS_A.fasta	B_spielmanii_A14S_proteome.fasta	8.66
Brachyspira_murdochii_DSM_12563.fasta	B_spielmanii_A14S_proteome.fasta	9.21
Brachyspira_pilosicoli_P43_6_78.fasta	B_spielmanii_A14S_proteome.fasta	10.14
Brachyspira_suanatina.fasta	B_spielmanii_A14S_proteome.fasta	8.7
Brachyspira_alvinipulli_ATCC_51933.fasta	B_valaisiana_VS116_proteome.fasta	8.4
Brachyspira_hampsonii_30446.fasta	B_valaisiana_VS116_proteome.fasta	9.47
Brachyspira_hyodysenteriae_ATCC_27164.fasta	B_valaisiana_VS116_proteome.fasta	9.26
Brachyspira_innocens_ATCC_29796.fasta	B_valaisiana_VS116_proteome.fasta	9.12
Brachyspira_intermedia_PWS_A.fasta	B_valaisiana_VS116_proteome.fasta	8.71
Brachyspira_murdochii_DSM_12563.fasta	B_valaisiana_VS116_proteome.fasta	9.22
Brachyspira_pilosicoli_P43_6_78.fasta	B_valaisiana_VS116_proteome.fasta	9.97
Brachyspira_suanatina.fasta	B_valaisiana_VS116_proteome.fasta	8.78
Brachyspira_alvinipulli_ATCC_51933.fasta	B_yangtzensis_Okinawa_proteome.fasta	7.95
Brachyspira_hampsonii_30446.fasta	B_yangtzensis_Okinawa_proteome.fasta	9.17
Brachyspira_hyodysenteriae_ATCC_27164.fasta	B_yangtzensis_Okinawa_proteome.fasta	8.67
Brachyspira_innocens_ATCC_29796.fasta	B_yangtzensis_Okinawa_proteome.fasta	8.5
Brachyspira_intermedia_PWS_A.fasta	B_yangtzensis_Okinawa_proteome.fasta	8.26
Brachyspira_murdochii_DSM_12563.fasta	B_yangtzensis_Okinawa_proteome.fasta	8.71
Brachyspira_pilosicoli_P43_6_78.fasta	B_yangtzensis_Okinawa_proteome.fasta	9.52
Brachyspira_suanatina.fasta	B_yangtzensis_Okinawa_proteome.fasta	8.48
B_afzelii_PKo_proteome.fasta	Brachyspira_alvinipulli_ATCC_51933.fasta	7.99
B_americana_SCW41_proteome.fasta	Brachyspira_alvinipulli_ATCC_51933.fasta	8.68
B_bavariensis_PBi_proteome.fasta	Brachyspira_alvinipulli_ATCC_51933.fasta	8.14
B_bissettiae_DN127_proteome.fasta	Brachyspira_alvinipulli_ATCC_51933.fasta	7.91
B_burgdorferi_B31_proteome.fasta	Brachyspira_alvinipulli_ATCC_51933.fasta	8.17
B_californiensis_CA446_proteome.fasta	Brachyspira_alvinipulli_ATCC_51933.fasta	8.3
B_carolinensis_SCW22_proteome.fasta	Brachyspira_alvinipulli_ATCC_51933.fasta	8.24
B_chilensis_VA1_proteome.fasta	Brachyspira_alvinipulli_ATCC_51933.fasta	8.88
B_finlandensis_SV1_proteome.fasta	Brachyspira_alvinipulli_ATCC_51933.fasta	8.16
B_garinii_20047_proteome.fasta	Brachyspira_alvinipulli_ATCC_51933.fasta	8.57
B_japonica_HO14_proteome.fasta	Brachyspira_alvinipulli_ATCC_51933.fasta	8.37
B_kurtenbachii_25015_proteome.fasta	Brachyspira_alvinipulli_ATCC_51933.fasta	8.15
B_lusitaniae_PoTiB2_proteome.fasta	Brachyspira_alvinipulli_ATCC_51933.fasta	8.65
B_mayonii_MN14-1420_proteome.fasta	Brachyspira_alvinipulli_ATCC_51933.fasta	8.36
B_spielmanii_A14S_proteome.fasta	Brachyspira_alvinipulli_ATCC_51933.fasta	8.37
B_valaisiana_VS116_proteome.fasta	Brachyspira_alvinipulli_ATCC_51933.fasta	8.4
B_yangtzensis_Okinawa_proteome.fasta	Brachyspira_alvinipulli_ATCC_51933.fasta	7.95
B_afzelii_PKo_proteome.fasta	Brachyspira_hampsonii_30446.fasta	9.2
B_americana_SCW41_proteome.fasta	Brachyspira_hampsonii_30446.fasta	9.66
B_bavariensis_PBi_proteome.fasta	Brachyspira_hampsonii_30446.fasta	9.16
B_bissettiae_DN127_proteome.fasta	Brachyspira_hampsonii_30446.fasta	8.72
B_burgdorferi_B31_proteome.fasta	Brachyspira_hampsonii_30446.fasta	9.02
B_californiensis_CA446_proteome.fasta	Brachyspira_hampsonii_30446.fasta	9.46
B_carolinensis_SCW22_proteome.fasta	Brachyspira_hampsonii_30446.fasta	9.27
B_chilensis_VA1_proteome.fasta	Brachyspira_hampsonii_30446.fasta	10.35
B_finlandensis_SV1_proteome.fasta	Brachyspira_hampsonii_30446.fasta	9.25
B_garinii_20047_proteome.fasta	Brachyspira_hampsonii_30446.fasta	9.51
B_japonica_HO14_proteome.fasta	Brachyspira_hampsonii_30446.fasta	9.55
B_kurtenbachii_25015_proteome.fasta	Brachyspira_hampsonii_30446.fasta	9.48
B_lusitaniae_PoTiB2_proteome.fasta	Brachyspira_hampsonii_30446.fasta	9.81
B_mayonii_MN14-1420_proteome.fasta	Brachyspira_hampsonii_30446.fasta	9.3
B_spielmanii_A14S_proteome.fasta	Brachyspira_hampsonii_30446.fasta	9.31
B_valaisiana_VS116_proteome.fasta	Brachyspira_hampsonii_30446.fasta	9.47
B_yangtzensis_Okinawa_proteome.fasta	Brachyspira_hampsonii_30446.fasta	9.17
B_afzelii_PKo_proteome.fasta	Brachyspira_hyodysenteriae_ATCC_27164.fasta	8.99
B_americana_SCW41_proteome.fasta	Brachyspira_hyodysenteriae_ATCC_27164.fasta	9.5
B_bavariensis_PBi_proteome.fasta	Brachyspira_hyodysenteriae_ATCC_27164.fasta	8.81
B_bissettiae_DN127_proteome.fasta	Brachyspira_hyodysenteriae_ATCC_27164.fasta	8.64
B_burgdorferi_B31_proteome.fasta	Brachyspira_hyodysenteriae_ATCC_27164.fasta	8.8
B_californiensis_CA446_proteome.fasta	Brachyspira_hyodysenteriae_ATCC_27164.fasta	9.14
B_carolinensis_SCW22_proteome.fasta	Brachyspira_hyodysenteriae_ATCC_27164.fasta	9.15
B_chilensis_VA1_proteome.fasta	Brachyspira_hyodysenteriae_ATCC_27164.fasta	9.84
B_finlandensis_SV1_proteome.fasta	Brachyspira_hyodysenteriae_ATCC_27164.fasta	8.97
B_garinii_20047_proteome.fasta	Brachyspira_hyodysenteriae_ATCC_27164.fasta	9.17
B_japonica_HO14_proteome.fasta	Brachyspira_hyodysenteriae_ATCC_27164.fasta	9.28
B_kurtenbachii_25015_proteome.fasta	Brachyspira_hyodysenteriae_ATCC_27164.fasta	9.27
B_lusitaniae_PoTiB2_proteome.fasta	Brachyspira_hyodysenteriae_ATCC_27164.fasta	9.48
B_mayonii_MN14-1420_proteome.fasta	Brachyspira_hyodysenteriae_ATCC_27164.fasta	9.2
B_spielmanii_A14S_proteome.fasta	Brachyspira_hyodysenteriae_ATCC_27164.fasta	9.13
B_valaisiana_VS116_proteome.fasta	Brachyspira_hyodysenteriae_ATCC_27164.fasta	9.26
B_yangtzensis_Okinawa_proteome.fasta	Brachyspira_hyodysenteriae_ATCC_27164.fasta	8.67
B_afzelii_PKo_proteome.fasta	Brachyspira_innocens_ATCC_29796.fasta	8.69
B_americana_SCW41_proteome.fasta	Brachyspira_innocens_ATCC_29796.fasta	9.35
B_bavariensis_PBi_proteome.fasta	Brachyspira_innocens_ATCC_29796.fasta	8.81
B_bissettiae_DN127_proteome.fasta	Brachyspira_innocens_ATCC_29796.fasta	8.36
B_burgdorferi_B31_proteome.fasta	Brachyspira_innocens_ATCC_29796.fasta	8.61
B_californiensis_CA446_proteome.fasta	Brachyspira_innocens_ATCC_29796.fasta	8.83
B_carolinensis_SCW22_proteome.fasta	Brachyspira_innocens_ATCC_29796.fasta	8.81
B_chilensis_VA1_proteome.fasta	Brachyspira_innocens_ATCC_29796.fasta	9.61
B_finlandensis_SV1_proteome.fasta	Brachyspira_innocens_ATCC_29796.fasta	8.89
B_garinii_20047_proteome.fasta	Brachyspira_innocens_ATCC_29796.fasta	8.9
B_japonica_HO14_proteome.fasta	Brachyspira_innocens_ATCC_29796.fasta	9.06
B_kurtenbachii_25015_proteome.fasta	Brachyspira_innocens_ATCC_29796.fasta	8.92
B_lusitaniae_PoTiB2_proteome.fasta	Brachyspira_innocens_ATCC_29796.fasta	9.12
B_mayonii_MN14-1420_proteome.fasta	Brachyspira_innocens_ATCC_29796.fasta	8.98
B_spielmanii_A14S_proteome.fasta	Brachyspira_innocens_ATCC_29796.fasta	8.82
B_valaisiana_VS116_proteome.fasta	Brachyspira_innocens_ATCC_29796.fasta	9.12
B_yangtzensis_Okinawa_proteome.fasta	Brachyspira_innocens_ATCC_29796.fasta	8.5
B_afzelii_PKo_proteome.fasta	Brachyspira_intermedia_PWS_A.fasta	8.54
B_americana_SCW41_proteome.fasta	Brachyspira_intermedia_PWS_A.fasta	9.04
B_bavariensis_PBi_proteome.fasta	Brachyspira_intermedia_PWS_A.fasta	8.38
B_bissettiae_DN127_proteome.fasta	Brachyspira_intermedia_PWS_A.fasta	8.15
B_burgdorferi_B31_proteome.fasta	Brachyspira_intermedia_PWS_A.fasta	8.36
B_californiensis_CA446_proteome.fasta	Brachyspira_intermedia_PWS_A.fasta	8.64
B_carolinensis_SCW22_proteome.fasta	Brachyspira_intermedia_PWS_A.fasta	8.6
B_chilensis_VA1_proteome.fasta	Brachyspira_intermedia_PWS_A.fasta	9.31
B_finlandensis_SV1_proteome.fasta	Brachyspira_intermedia_PWS_A.fasta	8.56
B_garinii_20047_proteome.fasta	Brachyspira_intermedia_PWS_A.fasta	8.67
B_japonica_HO14_proteome.fasta	Brachyspira_intermedia_PWS_A.fasta	8.64
B_kurtenbachii_25015_proteome.fasta	Brachyspira_intermedia_PWS_A.fasta	8.66
B_lusitaniae_PoTiB2_proteome.fasta	Brachyspira_intermedia_PWS_A.fasta	8.86
B_mayonii_MN14-1420_proteome.fasta	Brachyspira_intermedia_PWS_A.fasta	8.6
B_spielmanii_A14S_proteome.fasta	Brachyspira_intermedia_PWS_A.fasta	8.66
B_valaisiana_VS116_proteome.fasta	Brachyspira_intermedia_PWS_A.fasta	8.71
B_yangtzensis_Okinawa_proteome.fasta	Brachyspira_intermedia_PWS_A.fasta	8.26
B_afzelii_PKo_proteome.fasta	Brachyspira_murdochii_DSM_12563.fasta	8.95
B_americana_SCW41_proteome.fasta	Brachyspira_murdochii_DSM_12563.fasta	9.29
B_bavariensis_PBi_proteome.fasta	Brachyspira_murdochii_DSM_12563.fasta	8.83
B_bissettiae_DN127_proteome.fasta	Brachyspira_murdochii_DSM_12563.fasta	8.51
B_burgdorferi_B31_proteome.fasta	Brachyspira_murdochii_DSM_12563.fasta	8.72
B_californiensis_CA446_proteome.fasta	Brachyspira_murdochii_DSM_12563.fasta	9.05
B_carolinensis_SCW22_proteome.fasta	Brachyspira_murdochii_DSM_12563.fasta	8.95
B_chilensis_VA1_proteome.fasta	Brachyspira_murdochii_DSM_12563.fasta	9.91
B_finlandensis_SV1_proteome.fasta	Brachyspira_murdochii_DSM_12563.fasta	8.91
B_garinii_20047_proteome.fasta	Brachyspira_murdochii_DSM_12563.fasta	9.1
B_japonica_HO14_proteome.fasta	Brachyspira_murdochii_DSM_12563.fasta	9.1
B_kurtenbachii_25015_proteome.fasta	Brachyspira_murdochii_DSM_12563.fasta	9.04
B_lusitaniae_PoTiB2_proteome.fasta	Brachyspira_murdochii_DSM_12563.fasta	9.3
B_mayonii_MN14-1420_proteome.fasta	Brachyspira_murdochii_DSM_12563.fasta	9.15
B_spielmanii_A14S_proteome.fasta	Brachyspira_murdochii_DSM_12563.fasta	9.21
B_valaisiana_VS116_proteome.fasta	Brachyspira_murdochii_DSM_12563.fasta	9.22
B_yangtzensis_Okinawa_proteome.fasta	Brachyspira_murdochii_DSM_12563.fasta	8.71
B_afzelii_PKo_proteome.fasta	Brachyspira_pilosicoli_P43_6_78.fasta	9.52
B_americana_SCW41_proteome.fasta	Brachyspira_pilosicoli_P43_6_78.fasta	10.32
B_bavariensis_PBi_proteome.fasta	Brachyspira_pilosicoli_P43_6_78.fasta	9.51
B_bissettiae_DN127_proteome.fasta	Brachyspira_pilosicoli_P43_6_78.fasta	9.37
B_burgdorferi_B31_proteome.fasta	Brachyspira_pilosicoli_P43_6_78.fasta	9.63
B_californiensis_CA446_proteome.fasta	Brachyspira_pilosicoli_P43_6_78.fasta	10.02
B_carolinensis_SCW22_proteome.fasta	Brachyspira_pilosicoli_P43_6_78.fasta	9.89
B_chilensis_VA1_proteome.fasta	Brachyspira_pilosicoli_P43_6_78.fasta	11.03
B_finlandensis_SV1_proteome.fasta	Brachyspira_pilosicoli_P43_6_78.fasta	9.95
B_garinii_20047_proteome.fasta	Brachyspira_pilosicoli_P43_6_78.fasta	9.83
B_japonica_HO14_proteome.fasta	Brachyspira_pilosicoli_P43_6_78.fasta	10.06
B_kurtenbachii_25015_proteome.fasta	Brachyspira_pilosicoli_P43_6_78.fasta	10.07
B_lusitaniae_PoTiB2_proteome.fasta	Brachyspira_pilosicoli_P43_6_78.fasta	10.34
B_mayonii_MN14-1420_proteome.fasta	Brachyspira_pilosicoli_P43_6_78.fasta	10.1
B_spielmanii_A14S_proteome.fasta	Brachyspira_pilosicoli_P43_6_78.fasta	10.14
B_valaisiana_VS116_proteome.fasta	Brachyspira_pilosicoli_P43_6_78.fasta	9.97
B_yangtzensis_Okinawa_proteome.fasta	Brachyspira_pilosicoli_P43_6_78.fasta	9.52
B_afzelii_PKo_proteome.fasta	Brachyspira_suanatina.fasta	8.48
B_americana_SCW41_proteome.fasta	Brachyspira_suanatina.fasta	9.21
B_bavariensis_PBi_proteome.fasta	Brachyspira_suanatina.fasta	8.47
B_bissettiae_DN127_proteome.fasta	Brachyspira_suanatina.fasta	8.36
B_burgdorferi_B31_proteome.fasta	Brachyspira_suanatina.fasta	8.52
B_californiensis_CA446_proteome.fasta	Brachyspira_suanatina.fasta	8.71
B_carolinensis_SCW22_proteome.fasta	Brachyspira_suanatina.fasta	8.82
B_chilensis_VA1_proteome.fasta	Brachyspira_suanatina.fasta	9.39
B_finlandensis_SV1_proteome.fasta	Brachyspira_suanatina.fasta	8.78
B_garinii_20047_proteome.fasta	Brachyspira_suanatina.fasta	8.64
B_japonica_HO14_proteome.fasta	Brachyspira_suanatina.fasta	8.79
B_kurtenbachii_25015_proteome.fasta	Brachyspira_suanatina.fasta	8.96
B_lusitaniae_PoTiB2_proteome.fasta	Brachyspira_suanatina.fasta	9.01
B_mayonii_MN14-1420_proteome.fasta	Brachyspira_suanatina.fasta	8.77
B_spielmanii_A14S_proteome.fasta	Brachyspira_suanatina.fasta	8.7
B_valaisiana_VS116_proteome.fasta	Brachyspira_suanatina.fasta	8.78
B_yangtzensis_Okinawa_proteome.fasta	Brachyspira_suanatina.fasta	8.48
Leptospira_alexanderi_serovar_Manhao_3_str_L_60.fasta	B_afzelii_PKo_proteome.fasta	5.74
Leptospira_alstonii.fasta	B_afzelii_PKo_proteome.fasta	5.25
Leptospira_biflexa_serovar_Patoc_strain_Patoc_1_Paris.fasta	B_afzelii_PKo_proteome.fasta	5.57
Leptospira_borgpetersenii_serovar_Hardjo_bovis_str_L550.fasta	B_afzelii_PKo_proteome.fasta	6.42
Leptospira_broomii_serovar_Hurstbridge_str_5399.fasta	B_afzelii_PKo_proteome.fasta	5.28
Leptospira_fainei_serovar_Hurstbridge_str_BUT_6.fasta	B_afzelii_PKo_proteome.fasta	5.38
Leptospira_inadai_serovar_Lyme.fasta	B_afzelii_PKo_proteome.fasta	5.14
Leptospira_interrogans_serovar_Lai_str_56601.fasta	B_afzelii_PKo_proteome.fasta	5.75
Leptospira_kirschneri_serovar_Valbuzzi_str_200702274.fasta	B_afzelii_PKo_proteome.fasta	5.92
Leptospira_kmetyi_serovar_Malaysia_str_Bejo_Iso9.fasta	B_afzelii_PKo_proteome.fasta	5.36
Leptospira_licerasiae_serovar_Varillal_str_VAR_010.fasta	B_afzelii_PKo_proteome.fasta	5.59
Leptospira_mayottensis_200901122.fasta	B_afzelii_PKo_proteome.fasta	5.91
Leptospira_meyeri_serovar_Hardjo_str_Went_5.fasta	B_afzelii_PKo_proteome.fasta	5.38
Leptospira_noguchii_serovar_Panama_str_CZ214.fasta	B_afzelii_PKo_proteome.fasta	5.64
Leptospira_santarosai_serovar_Shermani_str_LT_821.fasta	B_afzelii_PKo_proteome.fasta	5.86
Leptospira_terpstrae_serovar_Hualin_str_LT_11_33.fasta	B_afzelii_PKo_proteome.fasta	5.25
Leptospira_vanthielii_serovar_Holland_str_Waz_Holland.fasta	B_afzelii_PKo_proteome.fasta	5.16
Leptospira_weilii_serovar_Topaz_str_LT2116.fasta	B_afzelii_PKo_proteome.fasta	5.63
Leptospira_wolbachii_serovar_Codice_str_CDC.fasta	B_afzelii_PKo_proteome.fasta	5.3
Leptospira_wolffii_serovar_Khorat_str_Khorat_H2.fasta	B_afzelii_PKo_proteome.fasta	5.25
Leptospira_yanagawae_serovar_Saopaulo_str_Sao_Paulo.fasta	B_afzelii_PKo_proteome.fasta	5.58
Leptospira_alexanderi_serovar_Manhao_3_str_L_60.fasta	B_americana_SCW41_proteome.fasta	5.72
Leptospira_alstonii.fasta	B_americana_SCW41_proteome.fasta	5.34
Leptospira_biflexa_serovar_Patoc_strain_Patoc_1_Paris.fasta	B_americana_SCW41_proteome.fasta	6
Leptospira_borgpetersenii_serovar_Hardjo_bovis_str_L550.fasta	B_americana_SCW41_proteome.fasta	6.42
Leptospira_broomii_serovar_Hurstbridge_str_5399.fasta	B_americana_SCW41_proteome.fasta	5.63
Leptospira_fainei_serovar_Hurstbridge_str_BUT_6.fasta	B_americana_SCW41_proteome.fasta	5.68
Leptospira_inadai_serovar_Lyme.fasta	B_americana_SCW41_proteome.fasta	5.44
Leptospira_interrogans_serovar_Lai_str_56601.fasta	B_americana_SCW41_proteome.fasta	5.84
Leptospira_kirschneri_serovar_Valbuzzi_str_200702274.fasta	B_americana_SCW41_proteome.fasta	6.04
Leptospira_kmetyi_serovar_Malaysia_str_Bejo_Iso9.fasta	B_americana_SCW41_proteome.fasta	5.44
Leptospira_licerasiae_serovar_Varillal_str_VAR_010.fasta	B_americana_SCW41_proteome.fasta	5.79
Leptospira_mayottensis_200901122.fasta	B_americana_SCW41_proteome.fasta	6.05
Leptospira_meyeri_serovar_Hardjo_str_Went_5.fasta	B_americana_SCW41_proteome.fasta	5.6
Leptospira_noguchii_serovar_Panama_str_CZ214.fasta	B_americana_SCW41_proteome.fasta	5.72
Leptospira_santarosai_serovar_Shermani_str_LT_821.fasta	B_americana_SCW41_proteome.fasta	6.06
Leptospira_terpstrae_serovar_Hualin_str_LT_11_33.fasta	B_americana_SCW41_proteome.fasta	5.49
Leptospira_vanthielii_serovar_Holland_str_Waz_Holland.fasta	B_americana_SCW41_proteome.fasta	5.45
Leptospira_weilii_serovar_Topaz_str_LT2116.fasta	B_americana_SCW41_proteome.fasta	5.7
Leptospira_wolbachii_serovar_Codice_str_CDC.fasta	B_americana_SCW41_proteome.fasta	5.42
Leptospira_wolffii_serovar_Khorat_str_Khorat_H2.fasta	B_americana_SCW41_proteome.fasta	5.39
Leptospira_yanagawae_serovar_Saopaulo_str_Sao_Paulo.fasta	B_americana_SCW41_proteome.fasta	5.91
Leptospira_alexanderi_serovar_Manhao_3_str_L_60.fasta	B_bavariensis_PBi_proteome.fasta	5.5
Leptospira_alstonii.fasta	B_bavariensis_PBi_proteome.fasta	5.14
Leptospira_biflexa_serovar_Patoc_strain_Patoc_1_Paris.fasta	B_bavariensis_PBi_proteome.fasta	5.64
Leptospira_borgpetersenii_serovar_Hardjo_bovis_str_L550.fasta	B_bavariensis_PBi_proteome.fasta	6.16
Leptospira_broomii_serovar_Hurstbridge_str_5399.fasta	B_bavariensis_PBi_proteome.fasta	5.32
Leptospira_fainei_serovar_Hurstbridge_str_BUT_6.fasta	B_bavariensis_PBi_proteome.fasta	5.38
Leptospira_inadai_serovar_Lyme.fasta	B_bavariensis_PBi_proteome.fasta	5.18
Leptospira_interrogans_serovar_Lai_str_56601.fasta	B_bavariensis_PBi_proteome.fasta	5.6
Leptospira_kirschneri_serovar_Valbuzzi_str_200702274.fasta	B_bavariensis_PBi_proteome.fasta	5.77
Leptospira_kmetyi_serovar_Malaysia_str_Bejo_Iso9.fasta	B_bavariensis_PBi_proteome.fasta	5.28
Leptospira_licerasiae_serovar_Varillal_str_VAR_010.fasta	B_bavariensis_PBi_proteome.fasta	5.56
Leptospira_mayottensis_200901122.fasta	B_bavariensis_PBi_proteome.fasta	5.88
Leptospira_meyeri_serovar_Hardjo_str_Went_5.fasta	B_bavariensis_PBi_proteome.fasta	5.48
Leptospira_noguchii_serovar_Panama_str_CZ214.fasta	B_bavariensis_PBi_proteome.fasta	5.63
Leptospira_santarosai_serovar_Shermani_str_LT_821.fasta	B_bavariensis_PBi_proteome.fasta	5.73
Leptospira_terpstrae_serovar_Hualin_str_LT_11_33.fasta	B_bavariensis_PBi_proteome.fasta	5.56
Leptospira_vanthielii_serovar_Holland_str_Waz_Holland.fasta	B_bavariensis_PBi_proteome.fasta	5.37
Leptospira_weilii_serovar_Topaz_str_LT2116.fasta	B_bavariensis_PBi_proteome.fasta	5.49
Leptospira_wolbachii_serovar_Codice_str_CDC.fasta	B_bavariensis_PBi_proteome.fasta	5.42
Leptospira_wolffii_serovar_Khorat_str_Khorat_H2.fasta	B_bavariensis_PBi_proteome.fasta	5.21
Leptospira_yanagawae_serovar_Saopaulo_str_Sao_Paulo.fasta	B_bavariensis_PBi_proteome.fasta	5.45
Leptospira_alexanderi_serovar_Manhao_3_str_L_60.fasta	B_bissettiae_DN127_proteome.fasta	5.51
Leptospira_alstonii.fasta	B_bissettiae_DN127_proteome.fasta	5.23
Leptospira_biflexa_serovar_Patoc_strain_Patoc_1_Paris.fasta	B_bissettiae_DN127_proteome.fasta	5.58
Leptospira_borgpetersenii_serovar_Hardjo_bovis_str_L550.fasta	B_bissettiae_DN127_proteome.fasta	6.24
Leptospira_broomii_serovar_Hurstbridge_str_5399.fasta	B_bissettiae_DN127_proteome.fasta	5.24
Leptospira_fainei_serovar_Hurstbridge_str_BUT_6.fasta	B_bissettiae_DN127_proteome.fasta	5.24
Leptospira_inadai_serovar_Lyme.fasta	B_bissettiae_DN127_proteome.fasta	5.18
Leptospira_interrogans_serovar_Lai_str_56601.fasta	B_bissettiae_DN127_proteome.fasta	5.45
Leptospira_kirschneri_serovar_Valbuzzi_str_200702274.fasta	B_bissettiae_DN127_proteome.fasta	5.69
Leptospira_kmetyi_serovar_Malaysia_str_Bejo_Iso9.fasta	B_bissettiae_DN127_proteome.fasta	5.22
Leptospira_licerasiae_serovar_Varillal_str_VAR_010.fasta	B_bissettiae_DN127_proteome.fasta	5.47
Leptospira_mayottensis_200901122.fasta	B_bissettiae_DN127_proteome.fasta	5.76
Leptospira_meyeri_serovar_Hardjo_str_Went_5.fasta	B_bissettiae_DN127_proteome.fasta	5.32
Leptospira_noguchii_serovar_Panama_str_CZ214.fasta	B_bissettiae_DN127_proteome.fasta	5.42
Leptospira_santarosai_serovar_Shermani_str_LT_821.fasta	B_bissettiae_DN127_proteome.fasta	5.74
Leptospira_terpstrae_serovar_Hualin_str_LT_11_33.fasta	B_bissettiae_DN127_proteome.fasta	5.4
Leptospira_vanthielii_serovar_Holland_str_Waz_Holland.fasta	B_bissettiae_DN127_proteome.fasta	5.21
Leptospira_weilii_serovar_Topaz_str_LT2116.fasta	B_bissettiae_DN127_proteome.fasta	5.6
Leptospira_wolbachii_serovar_Codice_str_CDC.fasta	B_bissettiae_DN127_proteome.fasta	5.23
Leptospira_wolffii_serovar_Khorat_str_Khorat_H2.fasta	B_bissettiae_DN127_proteome.fasta	5.07
Leptospira_yanagawae_serovar_Saopaulo_str_Sao_Paulo.fasta	B_bissettiae_DN127_proteome.fasta	5.56
Leptospira_alexanderi_serovar_Manhao_3_str_L_60.fasta	B_burgdorferi_B31_proteome.fasta	5.5
Leptospira_alstonii.fasta	B_burgdorferi_B31_proteome.fasta	5.11
Leptospira_biflexa_serovar_Patoc_strain_Patoc_1_Paris.fasta	B_burgdorferi_B31_proteome.fasta	5.61
Leptospira_borgpetersenii_serovar_Hardjo_bovis_str_L550.fasta	B_burgdorferi_B31_proteome.fasta	6.12
Leptospira_broomii_serovar_Hurstbridge_str_5399.fasta	B_burgdorferi_B31_proteome.fasta	5.33
Leptospira_fainei_serovar_Hurstbridge_str_BUT_6.fasta	B_burgdorferi_B31_proteome.fasta	5.25
Leptospira_inadai_serovar_Lyme.fasta	B_burgdorferi_B31_proteome.fasta	5.16
Leptospira_interrogans_serovar_Lai_str_56601.fasta	B_burgdorferi_B31_proteome.fasta	5.56
Leptospira_kirschneri_serovar_Valbuzzi_str_200702274.fasta	B_burgdorferi_B31_proteome.fasta	5.7
Leptospira_kmetyi_serovar_Malaysia_str_Bejo_Iso9.fasta	B_burgdorferi_B31_proteome.fasta	5.21
Leptospira_licerasiae_serovar_Varillal_str_VAR_010.fasta	B_burgdorferi_B31_proteome.fasta	5.57
Leptospira_mayottensis_200901122.fasta	B_burgdorferi_B31_proteome.fasta	5.77
Leptospira_meyeri_serovar_Hardjo_str_Went_5.fasta	B_burgdorferi_B31_proteome.fasta	5.41
Leptospira_noguchii_serovar_Panama_str_CZ214.fasta	B_burgdorferi_B31_proteome.fasta	5.33
Leptospira_santarosai_serovar_Shermani_str_LT_821.fasta	B_burgdorferi_B31_proteome.fasta	5.74
Leptospira_terpstrae_serovar_Hualin_str_LT_11_33.fasta	B_burgdorferi_B31_proteome.fasta	5.33
Leptospira_vanthielii_serovar_Holland_str_Waz_Holland.fasta	B_burgdorferi_B31_proteome.fasta	5.19
Leptospira_weilii_serovar_Topaz_str_LT2116.fasta	B_burgdorferi_B31_proteome.fasta	5.44
Leptospira_wolbachii_serovar_Codice_str_CDC.fasta	B_burgdorferi_B31_proteome.fasta	5.37
Leptospira_wolffii_serovar_Khorat_str_Khorat_H2.fasta	B_burgdorferi_B31_proteome.fasta	5.18
Leptospira_yanagawae_serovar_Saopaulo_str_Sao_Paulo.fasta	B_burgdorferi_B31_proteome.fasta	5.52
Leptospira_alexanderi_serovar_Manhao_3_str_L_60.fasta	B_californiensis_CA446_proteome.fasta	5.85
Leptospira_alstonii.fasta	B_californiensis_CA446_proteome.fasta	5.4
Leptospira_biflexa_serovar_Patoc_strain_Patoc_1_Paris.fasta	B_californiensis_CA446_proteome.fasta	5.75
Leptospira_borgpetersenii_serovar_Hardjo_bovis_str_L550.fasta	B_californiensis_CA446_proteome.fasta	6.35
Leptospira_broomii_serovar_Hurstbridge_str_5399.fasta	B_californiensis_CA446_proteome.fasta	5.36
Leptospira_fainei_serovar_Hurstbridge_str_BUT_6.fasta	B_californiensis_CA446_proteome.fasta	5.37
Leptospira_inadai_serovar_Lyme.fasta	B_californiensis_CA446_proteome.fasta	5.28
Leptospira_interrogans_serovar_Lai_str_56601.fasta	B_californiensis_CA446_proteome.fasta	5.91
Leptospira_kirschneri_serovar_Valbuzzi_str_200702274.fasta	B_californiensis_CA446_proteome.fasta	6.13
Leptospira_kmetyi_serovar_Malaysia_str_Bejo_Iso9.fasta	B_californiensis_CA446_proteome.fasta	5.52
Leptospira_licerasiae_serovar_Varillal_str_VAR_010.fasta	B_californiensis_CA446_proteome.fasta	5.65
Leptospira_mayottensis_200901122.fasta	B_californiensis_CA446_proteome.fasta	6.26
Leptospira_meyeri_serovar_Hardjo_str_Went_5.fasta	B_californiensis_CA446_proteome.fasta	5.56
Leptospira_noguchii_serovar_Panama_str_CZ214.fasta	B_californiensis_CA446_proteome.fasta	5.8
Leptospira_santarosai_serovar_Shermani_str_LT_821.fasta	B_californiensis_CA446_proteome.fasta	6
Leptospira_terpstrae_serovar_Hualin_str_LT_11_33.fasta	B_californiensis_CA446_proteome.fasta	5.56
Leptospira_vanthielii_serovar_Holland_str_Waz_Holland.fasta	B_californiensis_CA446_proteome.fasta	5.39
Leptospira_weilii_serovar_Topaz_str_LT2116.fasta	B_californiensis_CA446_proteome.fasta	5.81
Leptospira_wolbachii_serovar_Codice_str_CDC.fasta	B_californiensis_CA446_proteome.fasta	5.44
Leptospira_wolffii_serovar_Khorat_str_Khorat_H2.fasta	B_californiensis_CA446_proteome.fasta	5.31
Leptospira_yanagawae_serovar_Saopaulo_str_Sao_Paulo.fasta	B_californiensis_CA446_proteome.fasta	5.78
Leptospira_alexanderi_serovar_Manhao_3_str_L_60.fasta	B_carolinensis_SCW22_proteome.fasta	5.79
Leptospira_alstonii.fasta	B_carolinensis_SCW22_proteome.fasta	5.4
Leptospira_biflexa_serovar_Patoc_strain_Patoc_1_Paris.fasta	B_carolinensis_SCW22_proteome.fasta	5.75
Leptospira_borgpetersenii_serovar_Hardjo_bovis_str_L550.fasta	B_carolinensis_SCW22_proteome.fasta	6.52
Leptospira_broomii_serovar_Hurstbridge_str_5399.fasta	B_carolinensis_SCW22_proteome.fasta	5.44
Leptospira_fainei_serovar_Hurstbridge_str_BUT_6.fasta	B_carolinensis_SCW22_proteome.fasta	5.37
Leptospira_inadai_serovar_Lyme.fasta	B_carolinensis_SCW22_proteome.fasta	5.47
Leptospira_interrogans_serovar_Lai_str_56601.fasta	B_carolinensis_SCW22_proteome.fasta	5.74
Leptospira_kirschneri_serovar_Valbuzzi_str_200702274.fasta	B_carolinensis_SCW22_proteome.fasta	6
Leptospira_kmetyi_serovar_Malaysia_str_Bejo_Iso9.fasta	B_carolinensis_SCW22_proteome.fasta	5.42
Leptospira_licerasiae_serovar_Varillal_str_VAR_010.fasta	B_carolinensis_SCW22_proteome.fasta	5.71
Leptospira_mayottensis_200901122.fasta	B_carolinensis_SCW22_proteome.fasta	5.96
Leptospira_meyeri_serovar_Hardjo_str_Went_5.fasta	B_carolinensis_SCW22_proteome.fasta	5.43
Leptospira_noguchii_serovar_Panama_str_CZ214.fasta	B_carolinensis_SCW22_proteome.fasta	5.8
Leptospira_santarosai_serovar_Shermani_str_LT_821.fasta	B_carolinensis_SCW22_proteome.fasta	5.93
Leptospira_terpstrae_serovar_Hualin_str_LT_11_33.fasta	B_carolinensis_SCW22_proteome.fasta	5.44
Leptospira_vanthielii_serovar_Holland_str_Waz_Holland.fasta	B_carolinensis_SCW22_proteome.fasta	5.41
Leptospira_weilii_serovar_Topaz_str_LT2116.fasta	B_carolinensis_SCW22_proteome.fasta	5.81
Leptospira_wolbachii_serovar_Codice_str_CDC.fasta	B_carolinensis_SCW22_proteome.fasta	5.39
Leptospira_wolffii_serovar_Khorat_str_Khorat_H2.fasta	B_carolinensis_SCW22_proteome.fasta	5.22
Leptospira_yanagawae_serovar_Saopaulo_str_Sao_Paulo.fasta	B_carolinensis_SCW22_proteome.fasta	5.64
Leptospira_alexanderi_serovar_Manhao_3_str_L_60.fasta	B_chilensis_VA1_proteome.fasta	6.11
Leptospira_alstonii.fasta	B_chilensis_VA1_proteome.fasta	5.53
Leptospira_biflexa_serovar_Patoc_strain_Patoc_1_Paris.fasta	B_chilensis_VA1_proteome.fasta	5.91
Leptospira_borgpetersenii_serovar_Hardjo_bovis_str_L550.fasta	B_chilensis_VA1_proteome.fasta	6.87
Leptospira_broomii_serovar_Hurstbridge_str_5399.fasta	B_chilensis_VA1_proteome.fasta	5.75
Leptospira_fainei_serovar_Hurstbridge_str_BUT_6.fasta	B_chilensis_VA1_proteome.fasta	5.96
Leptospira_inadai_serovar_Lyme.fasta	B_chilensis_VA1_proteome.fasta	5.65
Leptospira_interrogans_serovar_Lai_str_56601.fasta	B_chilensis_VA1_proteome.fasta	6.07
Leptospira_kirschneri_serovar_Valbuzzi_str_200702274.fasta	B_chilensis_VA1_proteome.fasta	6.37
Leptospira_kmetyi_serovar_Malaysia_str_Bejo_Iso9.fasta	B_chilensis_VA1_proteome.fasta	5.83
Leptospira_licerasiae_serovar_Varillal_str_VAR_010.fasta	B_chilensis_VA1_proteome.fasta	5.98
Leptospira_mayottensis_200901122.fasta	B_chilensis_VA1_proteome.fasta	6.27
Leptospira_meyeri_serovar_Hardjo_str_Went_5.fasta	B_chilensis_VA1_proteome.fasta	5.85
Leptospira_noguchii_serovar_Panama_str_CZ214.fasta	B_chilensis_VA1_proteome.fasta	6.26
Leptospira_santarosai_serovar_Shermani_str_LT_821.fasta	B_chilensis_VA1_proteome.fasta	6.26
Leptospira_terpstrae_serovar_Hualin_str_LT_11_33.fasta	B_chilensis_VA1_proteome.fasta	5.76
Leptospira_vanthielii_serovar_Holland_str_Waz_Holland.fasta	B_chilensis_VA1_proteome.fasta	5.54
Leptospira_weilii_serovar_Topaz_str_LT2116.fasta	B_chilensis_VA1_proteome.fasta	6.12
Leptospira_wolbachii_serovar_Codice_str_CDC.fasta	B_chilensis_VA1_proteome.fasta	5.81
Leptospira_wolffii_serovar_Khorat_str_Khorat_H2.fasta	B_chilensis_VA1_proteome.fasta	5.78
Leptospira_yanagawae_serovar_Saopaulo_str_Sao_Paulo.fasta	B_chilensis_VA1_proteome.fasta	5.9
Leptospira_alexanderi_serovar_Manhao_3_str_L_60.fasta	B_finlandensis_SV1_proteome.fasta	5.55
Leptospira_alstonii.fasta	B_finlandensis_SV1_proteome.fasta	5.23
Leptospira_biflexa_serovar_Patoc_strain_Patoc_1_Paris.fasta	B_finlandensis_SV1_proteome.fasta	5.58
Leptospira_borgpetersenii_serovar_Hardjo_bovis_str_L550.fasta	B_finlandensis_SV1_proteome.fasta	6.24
Leptospira_broomii_serovar_Hurstbridge_str_5399.fasta	B_finlandensis_SV1_proteome.fasta	5.28
Leptospira_fainei_serovar_Hurstbridge_str_BUT_6.fasta	B_finlandensis_SV1_proteome.fasta	5.31
Leptospira_inadai_serovar_Lyme.fasta	B_finlandensis_SV1_proteome.fasta	5.15
Leptospira_interrogans_serovar_Lai_str_56601.fasta	B_finlandensis_SV1_proteome.fasta	5.61
Leptospira_kirschneri_serovar_Valbuzzi_str_200702274.fasta	B_finlandensis_SV1_proteome.fasta	5.84
Leptospira_kmetyi_serovar_Malaysia_str_Bejo_Iso9.fasta	B_finlandensis_SV1_proteome.fasta	5.25
Leptospira_licerasiae_serovar_Varillal_str_VAR_010.fasta	B_finlandensis_SV1_proteome.fasta	5.54
Leptospira_mayottensis_200901122.fasta	B_finlandensis_SV1_proteome.fasta	5.91
Leptospira_meyeri_serovar_Hardjo_str_Went_5.fasta	B_finlandensis_SV1_proteome.fasta	5.5
Leptospira_noguchii_serovar_Panama_str_CZ214.fasta	B_finlandensis_SV1_proteome.fasta	5.5
Leptospira_santarosai_serovar_Shermani_str_LT_821.fasta	B_finlandensis_SV1_proteome.fasta	5.8
Leptospira_terpstrae_serovar_Hualin_str_LT_11_33.fasta	B_finlandensis_SV1_proteome.fasta	5.33
Leptospira_vanthielii_serovar_Holland_str_Waz_Holland.fasta	B_finlandensis_SV1_proteome.fasta	5.22
Leptospira_weilii_serovar_Topaz_str_LT2116.fasta	B_finlandensis_SV1_proteome.fasta	5.54
Leptospira_wolbachii_serovar_Codice_str_CDC.fasta	B_finlandensis_SV1_proteome.fasta	5.36
Leptospira_wolffii_serovar_Khorat_str_Khorat_H2.fasta	B_finlandensis_SV1_proteome.fasta	5.16
Leptospira_yanagawae_serovar_Saopaulo_str_Sao_Paulo.fasta	B_finlandensis_SV1_proteome.fasta	5.68
Leptospira_alexanderi_serovar_Manhao_3_str_L_60.fasta	B_garinii_20047_proteome.fasta	5.62
Leptospira_alstonii.fasta	B_garinii_20047_proteome.fasta	5.26
Leptospira_biflexa_serovar_Patoc_strain_Patoc_1_Paris.fasta	B_garinii_20047_proteome.fasta	5.71
Leptospira_borgpetersenii_serovar_Hardjo_bovis_str_L550.fasta	B_garinii_20047_proteome.fasta	6.39
Leptospira_broomii_serovar_Hurstbridge_str_5399.fasta	B_garinii_20047_proteome.fasta	5.48
Leptospira_fainei_serovar_Hurstbridge_str_BUT_6.fasta	B_garinii_20047_proteome.fasta	5.57
Leptospira_inadai_serovar_Lyme.fasta	B_garinii_20047_proteome.fasta	5.36
Leptospira_interrogans_serovar_Lai_str_56601.fasta	B_garinii_20047_proteome.fasta	5.89
Leptospira_kirschneri_serovar_Valbuzzi_str_200702274.fasta	B_garinii_20047_proteome.fasta	5.85
Leptospira_kmetyi_serovar_Malaysia_str_Bejo_Iso9.fasta	B_garinii_20047_proteome.fasta	5.35
Leptospira_licerasiae_serovar_Varillal_str_VAR_010.fasta	B_garinii_20047_proteome.fasta	5.67
Leptospira_mayottensis_200901122.fasta	B_garinii_20047_proteome.fasta	6.01
Leptospira_meyeri_serovar_Hardjo_str_Went_5.fasta	B_garinii_20047_proteome.fasta	5.55
Leptospira_noguchii_serovar_Panama_str_CZ214.fasta	B_garinii_20047_proteome.fasta	5.68
Leptospira_santarosai_serovar_Shermani_str_LT_821.fasta	B_garinii_20047_proteome.fasta	5.83
Leptospira_terpstrae_serovar_Hualin_str_LT_11_33.fasta	B_garinii_20047_proteome.fasta	5.54
Leptospira_vanthielii_serovar_Holland_str_Waz_Holland.fasta	B_garinii_20047_proteome.fasta	5.4
Leptospira_weilii_serovar_Topaz_str_LT2116.fasta	B_garinii_20047_proteome.fasta	5.7
Leptospira_wolbachii_serovar_Codice_str_CDC.fasta	B_garinii_20047_proteome.fasta	5.49
Leptospira_wolffii_serovar_Khorat_str_Khorat_H2.fasta	B_garinii_20047_proteome.fasta	5.3
Leptospira_yanagawae_serovar_Saopaulo_str_Sao_Paulo.fasta	B_garinii_20047_proteome.fasta	5.66
Leptospira_alexanderi_serovar_Manhao_3_str_L_60.fasta	B_japonica_HO14_proteome.fasta	5.78
Leptospira_alstonii.fasta	B_japonica_HO14_proteome.fasta	5.38
Leptospira_biflexa_serovar_Patoc_strain_Patoc_1_Paris.fasta	B_japonica_HO14_proteome.fasta	5.64
Leptospira_borgpetersenii_serovar_Hardjo_bovis_str_L550.fasta	B_japonica_HO14_proteome.fasta	6.54
Leptospira_broomii_serovar_Hurstbridge_str_5399.fasta	B_japonica_HO14_proteome.fasta	5.39
Leptospira_fainei_serovar_Hurstbridge_str_BUT_6.fasta	B_japonica_HO14_proteome.fasta	5.49
Leptospira_inadai_serovar_Lyme.fasta	B_japonica_HO14_proteome.fasta	5.32
Leptospira_interrogans_serovar_Lai_str_56601.fasta	B_japonica_HO14_proteome.fasta	5.83
Leptospira_kirschneri_serovar_Valbuzzi_str_200702274.fasta	B_japonica_HO14_proteome.fasta	5.99
Leptospira_kmetyi_serovar_Malaysia_str_Bejo_Iso9.fasta	B_japonica_HO14_proteome.fasta	5.56
Leptospira_licerasiae_serovar_Varillal_str_VAR_010.fasta	B_japonica_HO14_proteome.fasta	5.6
Leptospira_mayottensis_200901122.fasta	B_japonica_HO14_proteome.fasta	6.06
Leptospira_meyeri_serovar_Hardjo_str_Went_5.fasta	B_japonica_HO14_proteome.fasta	5.51
Leptospira_noguchii_serovar_Panama_str_CZ214.fasta	B_japonica_HO14_proteome.fasta	5.83
Leptospira_santarosai_serovar_Shermani_str_LT_821.fasta	B_japonica_HO14_proteome.fasta	5.86
Leptospira_terpstrae_serovar_Hualin_str_LT_11_33.fasta	B_japonica_HO14_proteome.fasta	5.58
Leptospira_vanthielii_serovar_Holland_str_Waz_Holland.fasta	B_japonica_HO14_proteome.fasta	5.42
Leptospira_weilii_serovar_Topaz_str_LT2116.fasta	B_japonica_HO14_proteome.fasta	5.84
Leptospira_wolbachii_serovar_Codice_str_CDC.fasta	B_japonica_HO14_proteome.fasta	5.43
Leptospira_wolffii_serovar_Khorat_str_Khorat_H2.fasta	B_japonica_HO14_proteome.fasta	5.42
Leptospira_yanagawae_serovar_Saopaulo_str_Sao_Paulo.fasta	B_japonica_HO14_proteome.fasta	5.57
Leptospira_alexanderi_serovar_Manhao_3_str_L_60.fasta	B_kurtenbachii_25015_proteome.fasta	5.87
Leptospira_alstonii.fasta	B_kurtenbachii_25015_proteome.fasta	5.52
Leptospira_biflexa_serovar_Patoc_strain_Patoc_1_Paris.fasta	B_kurtenbachii_25015_proteome.fasta	5.79
Leptospira_borgpetersenii_serovar_Hardjo_bovis_str_L550.fasta	B_kurtenbachii_25015_proteome.fasta	6.59
Leptospira_broomii_serovar_Hurstbridge_str_5399.fasta	B_kurtenbachii_25015_proteome.fasta	5.4
Leptospira_fainei_serovar_Hurstbridge_str_BUT_6.fasta	B_kurtenbachii_25015_proteome.fasta	5.43
Leptospira_inadai_serovar_Lyme.fasta	B_kurtenbachii_25015_proteome.fasta	5.39
Leptospira_interrogans_serovar_Lai_str_56601.fasta	B_kurtenbachii_25015_proteome.fasta	5.94
Leptospira_kirschneri_serovar_Valbuzzi_str_200702274.fasta	B_kurtenbachii_25015_proteome.fasta	6.14
Leptospira_kmetyi_serovar_Malaysia_str_Bejo_Iso9.fasta	B_kurtenbachii_25015_proteome.fasta	5.51
Leptospira_licerasiae_serovar_Varillal_str_VAR_010.fasta	B_kurtenbachii_25015_proteome.fasta	5.82
Leptospira_mayottensis_200901122.fasta	B_kurtenbachii_25015_proteome.fasta	6.26
Leptospira_meyeri_serovar_Hardjo_str_Went_5.fasta	B_kurtenbachii_25015_proteome.fasta	5.6
Leptospira_noguchii_serovar_Panama_str_CZ214.fasta	B_kurtenbachii_25015_proteome.fasta	5.86
Leptospira_santarosai_serovar_Shermani_str_LT_821.fasta	B_kurtenbachii_25015_proteome.fasta	6.03
Leptospira_terpstrae_serovar_Hualin_str_LT_11_33.fasta	B_kurtenbachii_25015_proteome.fasta	5.67
Leptospira_vanthielii_serovar_Holland_str_Waz_Holland.fasta	B_kurtenbachii_25015_proteome.fasta	5.47
Leptospira_weilii_serovar_Topaz_str_LT2116.fasta	B_kurtenbachii_25015_proteome.fasta	5.85
Leptospira_wolbachii_serovar_Codice_str_CDC.fasta	B_kurtenbachii_25015_proteome.fasta	5.52
Leptospira_wolffii_serovar_Khorat_str_Khorat_H2.fasta	B_kurtenbachii_25015_proteome.fasta	5.41
Leptospira_yanagawae_serovar_Saopaulo_str_Sao_Paulo.fasta	B_kurtenbachii_25015_proteome.fasta	5.86
Leptospira_alexanderi_serovar_Manhao_3_str_L_60.fasta	B_lusitaniae_PoTiB2_proteome.fasta	5.97
Leptospira_alstonii.fasta	B_lusitaniae_PoTiB2_proteome.fasta	5.38
Leptospira_biflexa_serovar_Patoc_strain_Patoc_1_Paris.fasta	B_lusitaniae_PoTiB2_proteome.fasta	5.81
Leptospira_borgpetersenii_serovar_Hardjo_bovis_str_L550.fasta	B_lusitaniae_PoTiB2_proteome.fasta	6.78
Leptospira_broomii_serovar_Hurstbridge_str_5399.fasta	B_lusitaniae_PoTiB2_proteome.fasta	5.66
Leptospira_fainei_serovar_Hurstbridge_str_BUT_6.fasta	B_lusitaniae_PoTiB2_proteome.fasta	5.8
Leptospira_inadai_serovar_Lyme.fasta	B_lusitaniae_PoTiB2_proteome.fasta	5.45
Leptospira_interrogans_serovar_Lai_str_56601.fasta	B_lusitaniae_PoTiB2_proteome.fasta	5.86
Leptospira_kirschneri_serovar_Valbuzzi_str_200702274.fasta	B_lusitaniae_PoTiB2_proteome.fasta	6.18
Leptospira_kmetyi_serovar_Malaysia_str_Bejo_Iso9.fasta	B_lusitaniae_PoTiB2_proteome.fasta	5.6
Leptospira_licerasiae_serovar_Varillal_str_VAR_010.fasta	B_lusitaniae_PoTiB2_proteome.fasta	5.82
Leptospira_mayottensis_200901122.fasta	B_lusitaniae_PoTiB2_proteome.fasta	6.32
Leptospira_meyeri_serovar_Hardjo_str_Went_5.fasta	B_lusitaniae_PoTiB2_proteome.fasta	5.69
Leptospira_noguchii_serovar_Panama_str_CZ214.fasta	B_lusitaniae_PoTiB2_proteome.fasta	5.83
Leptospira_santarosai_serovar_Shermani_str_LT_821.fasta	B_lusitaniae_PoTiB2_proteome.fasta	6.14
Leptospira_terpstrae_serovar_Hualin_str_LT_11_33.fasta	B_lusitaniae_PoTiB2_proteome.fasta	5.71
Leptospira_vanthielii_serovar_Holland_str_Waz_Holland.fasta	B_lusitaniae_PoTiB2_proteome.fasta	5.52
Leptospira_weilii_serovar_Topaz_str_LT2116.fasta	B_lusitaniae_PoTiB2_proteome.fasta	6.04
Leptospira_wolbachii_serovar_Codice_str_CDC.fasta	B_lusitaniae_PoTiB2_proteome.fasta	5.68
Leptospira_wolffii_serovar_Khorat_str_Khorat_H2.fasta	B_lusitaniae_PoTiB2_proteome.fasta	5.45
Leptospira_yanagawae_serovar_Saopaulo_str_Sao_Paulo.fasta	B_lusitaniae_PoTiB2_proteome.fasta	5.63
Leptospira_alexanderi_serovar_Manhao_3_str_L_60.fasta	B_mayonii_MN14-1420_proteome.fasta	5.81
Leptospira_alstonii.fasta	B_mayonii_MN14-1420_proteome.fasta	5.4
Leptospira_biflexa_serovar_Patoc_strain_Patoc_1_Paris.fasta	B_mayonii_MN14-1420_proteome.fasta	5.79
Leptospira_borgpetersenii_serovar_Hardjo_bovis_str_L550.fasta	B_mayonii_MN14-1420_proteome.fasta	6.63
Leptospira_broomii_serovar_Hurstbridge_str_5399.fasta	B_mayonii_MN14-1420_proteome.fasta	5.29
Leptospira_fainei_serovar_Hurstbridge_str_BUT_6.fasta	B_mayonii_MN14-1420_proteome.fasta	5.39
Leptospira_inadai_serovar_Lyme.fasta	B_mayonii_MN14-1420_proteome.fasta	5.22
Leptospira_interrogans_serovar_Lai_str_56601.fasta	B_mayonii_MN14-1420_proteome.fasta	5.8
Leptospira_kirschneri_serovar_Valbuzzi_str_200702274.fasta	B_mayonii_MN14-1420_proteome.fasta	6.08
Leptospira_kmetyi_serovar_Malaysia_str_Bejo_Iso9.fasta	B_mayonii_MN14-1420_proteome.fasta	5.52
Leptospira_licerasiae_serovar_Varillal_str_VAR_010.fasta	B_mayonii_MN14-1420_proteome.fasta	5.73
Leptospira_mayottensis_200901122.fasta	B_mayonii_MN14-1420_proteome.fasta	6.04
Leptospira_meyeri_serovar_Hardjo_str_Went_5.fasta	B_mayonii_MN14-1420_proteome.fasta	5.58
Leptospira_noguchii_serovar_Panama_str_CZ214.fasta	B_mayonii_MN14-1420_proteome.fasta	5.82
Leptospira_santarosai_serovar_Shermani_str_LT_821.fasta	B_mayonii_MN14-1420_proteome.fasta	5.87
Leptospira_terpstrae_serovar_Hualin_str_LT_11_33.fasta	B_mayonii_MN14-1420_proteome.fasta	5.5
Leptospira_vanthielii_serovar_Holland_str_Waz_Holland.fasta	B_mayonii_MN14-1420_proteome.fasta	5.38
Leptospira_weilii_serovar_Topaz_str_LT2116.fasta	B_mayonii_MN14-1420_proteome.fasta	5.85
Leptospira_wolbachii_serovar_Codice_str_CDC.fasta	B_mayonii_MN14-1420_proteome.fasta	5.53
Leptospira_wolffii_serovar_Khorat_str_Khorat_H2.fasta	B_mayonii_MN14-1420_proteome.fasta	5.36
Leptospira_yanagawae_serovar_Saopaulo_str_Sao_Paulo.fasta	B_mayonii_MN14-1420_proteome.fasta	5.76
Leptospira_alexanderi_serovar_Manhao_3_str_L_60.fasta	B_spielmanii_A14S_proteome.fasta	5.77
Leptospira_alstonii.fasta	B_spielmanii_A14S_proteome.fasta	5.39
Leptospira_biflexa_serovar_Patoc_strain_Patoc_1_Paris.fasta	B_spielmanii_A14S_proteome.fasta	5.61
Leptospira_borgpetersenii_serovar_Hardjo_bovis_str_L550.fasta	B_spielmanii_A14S_proteome.fasta	6.39
Leptospira_broomii_serovar_Hurstbridge_str_5399.fasta	B_spielmanii_A14S_proteome.fasta	5.27
Leptospira_fainei_serovar_Hurstbridge_str_BUT_6.fasta	B_spielmanii_A14S_proteome.fasta	5.44
Leptospira_inadai_serovar_Lyme.fasta	B_spielmanii_A14S_proteome.fasta	5.15
Leptospira_interrogans_serovar_Lai_str_56601.fasta	B_spielmanii_A14S_proteome.fasta	5.74
Leptospira_kirschneri_serovar_Valbuzzi_str_200702274.fasta	B_spielmanii_A14S_proteome.fasta	5.98
Leptospira_kmetyi_serovar_Malaysia_str_Bejo_Iso9.fasta	B_spielmanii_A14S_proteome.fasta	5.45
Leptospira_licerasiae_serovar_Varillal_str_VAR_010.fasta	B_spielmanii_A14S_proteome.fasta	5.69
Leptospira_mayottensis_200901122.fasta	B_spielmanii_A14S_proteome.fasta	6.07
Leptospira_meyeri_serovar_Hardjo_str_Went_5.fasta	B_spielmanii_A14S_proteome.fasta	5.43
Leptospira_noguchii_serovar_Panama_str_CZ214.fasta	B_spielmanii_A14S_proteome.fasta	5.53
Leptospira_santarosai_serovar_Shermani_str_LT_821.fasta	B_spielmanii_A14S_proteome.fasta	5.98
Leptospira_terpstrae_serovar_Hualin_str_LT_11_33.fasta	B_spielmanii_A14S_proteome.fasta	5.42
Leptospira_vanthielii_serovar_Holland_str_Waz_Holland.fasta	B_spielmanii_A14S_proteome.fasta	5.34
Leptospira_weilii_serovar_Topaz_str_LT2116.fasta	B_spielmanii_A14S_proteome.fasta	5.79
Leptospira_wolbachii_serovar_Codice_str_CDC.fasta	B_spielmanii_A14S_proteome.fasta	5.47
Leptospira_wolffii_serovar_Khorat_str_Khorat_H2.fasta	B_spielmanii_A14S_proteome.fasta	5.25
Leptospira_yanagawae_serovar_Saopaulo_str_Sao_Paulo.fasta	B_spielmanii_A14S_proteome.fasta	5.65
Leptospira_alexanderi_serovar_Manhao_3_str_L_60.fasta	B_valaisiana_VS116_proteome.fasta	5.74
Leptospira_alstonii.fasta	B_valaisiana_VS116_proteome.fasta	5.27
Leptospira_biflexa_serovar_Patoc_strain_Patoc_1_Paris.fasta	B_valaisiana_VS116_proteome.fasta	5.55
Leptospira_borgpetersenii_serovar_Hardjo_bovis_str_L550.fasta	B_valaisiana_VS116_proteome.fasta	6.25
Leptospira_broomii_serovar_Hurstbridge_str_5399.fasta	B_valaisiana_VS116_proteome.fasta	5.34
Leptospira_fainei_serovar_Hurstbridge_str_BUT_6.fasta	B_valaisiana_VS116_proteome.fasta	5.51
Leptospira_inadai_serovar_Lyme.fasta	B_valaisiana_VS116_proteome.fasta	5.41
Leptospira_interrogans_serovar_Lai_str_56601.fasta	B_valaisiana_VS116_proteome.fasta	5.78
Leptospira_kirschneri_serovar_Valbuzzi_str_200702274.fasta	B_valaisiana_VS116_proteome.fasta	5.95
Leptospira_kmetyi_serovar_Malaysia_str_Bejo_Iso9.fasta	B_valaisiana_VS116_proteome.fasta	5.48
Leptospira_licerasiae_serovar_Varillal_str_VAR_010.fasta	B_valaisiana_VS116_proteome.fasta	5.8
Leptospira_mayottensis_200901122.fasta	B_valaisiana_VS116_proteome.fasta	5.96
Leptospira_meyeri_serovar_Hardjo_str_Went_5.fasta	B_valaisiana_VS116_proteome.fasta	5.39
Leptospira_noguchii_serovar_Panama_str_CZ214.fasta	B_valaisiana_VS116_proteome.fasta	5.76
Leptospira_santarosai_serovar_Shermani_str_LT_821.fasta	B_valaisiana_VS116_proteome.fasta	5.95
Leptospira_terpstrae_serovar_Hualin_str_LT_11_33.fasta	B_valaisiana_VS116_proteome.fasta	5.4
Leptospira_vanthielii_serovar_Holland_str_Waz_Holland.fasta	B_valaisiana_VS116_proteome.fasta	5.22
Leptospira_weilii_serovar_Topaz_str_LT2116.fasta	B_valaisiana_VS116_proteome.fasta	5.76
Leptospira_wolbachii_serovar_Codice_str_CDC.fasta	B_valaisiana_VS116_proteome.fasta	5.26
Leptospira_wolffii_serovar_Khorat_str_Khorat_H2.fasta	B_valaisiana_VS116_proteome.fasta	5.32
Leptospira_yanagawae_serovar_Saopaulo_str_Sao_Paulo.fasta	B_valaisiana_VS116_proteome.fasta	5.62
Leptospira_alexanderi_serovar_Manhao_3_str_L_60.fasta	B_yangtzensis_Okinawa_proteome.fasta	5.55
Leptospira_alstonii.fasta	B_yangtzensis_Okinawa_proteome.fasta	5.16
Leptospira_biflexa_serovar_Patoc_strain_Patoc_1_Paris.fasta	B_yangtzensis_Okinawa_proteome.fasta	5.5
Leptospira_borgpetersenii_serovar_Hardjo_bovis_str_L550.fasta	B_yangtzensis_Okinawa_proteome.fasta	6.25
Leptospira_broomii_serovar_Hurstbridge_str_5399.fasta	B_yangtzensis_Okinawa_proteome.fasta	5.38
Leptospira_fainei_serovar_Hurstbridge_str_BUT_6.fasta	B_yangtzensis_Okinawa_proteome.fasta	5.5
Leptospira_inadai_serovar_Lyme.fasta	B_yangtzensis_Okinawa_proteome.fasta	5.35
Leptospira_interrogans_serovar_Lai_str_56601.fasta	B_yangtzensis_Okinawa_proteome.fasta	5.59
Leptospira_kirschneri_serovar_Valbuzzi_str_200702274.fasta	B_yangtzensis_Okinawa_proteome.fasta	5.9
Leptospira_kmetyi_serovar_Malaysia_str_Bejo_Iso9.fasta	B_yangtzensis_Okinawa_proteome.fasta	5.47
Leptospira_licerasiae_serovar_Varillal_str_VAR_010.fasta	B_yangtzensis_Okinawa_proteome.fasta	5.93
Leptospira_mayottensis_200901122.fasta	B_yangtzensis_Okinawa_proteome.fasta	5.88
Leptospira_meyeri_serovar_Hardjo_str_Went_5.fasta	B_yangtzensis_Okinawa_proteome.fasta	5.29
Leptospira_noguchii_serovar_Panama_str_CZ214.fasta	B_yangtzensis_Okinawa_proteome.fasta	5.45
Leptospira_santarosai_serovar_Shermani_str_LT_821.fasta	B_yangtzensis_Okinawa_proteome.fasta	5.78
Leptospira_terpstrae_serovar_Hualin_str_LT_11_33.fasta	B_yangtzensis_Okinawa_proteome.fasta	5.27
Leptospira_vanthielii_serovar_Holland_str_Waz_Holland.fasta	B_yangtzensis_Okinawa_proteome.fasta	5.16
Leptospira_weilii_serovar_Topaz_str_LT2116.fasta	B_yangtzensis_Okinawa_proteome.fasta	5.51
Leptospira_wolbachii_serovar_Codice_str_CDC.fasta	B_yangtzensis_Okinawa_proteome.fasta	5.12
Leptospira_wolffii_serovar_Khorat_str_Khorat_H2.fasta	B_yangtzensis_Okinawa_proteome.fasta	5.22
Leptospira_yanagawae_serovar_Saopaulo_str_Sao_Paulo.fasta	B_yangtzensis_Okinawa_proteome.fasta	5.41
B_afzelii_PKo_proteome.fasta	Leptospira_alexanderi_serovar_Manhao_3_str_L_60.fasta	5.74
B_americana_SCW41_proteome.fasta	Leptospira_alexanderi_serovar_Manhao_3_str_L_60.fasta	5.72
B_bavariensis_PBi_proteome.fasta	Leptospira_alexanderi_serovar_Manhao_3_str_L_60.fasta	5.5
B_bissettiae_DN127_proteome.fasta	Leptospira_alexanderi_serovar_Manhao_3_str_L_60.fasta	5.51
B_burgdorferi_B31_proteome.fasta	Leptospira_alexanderi_serovar_Manhao_3_str_L_60.fasta	5.5
B_californiensis_CA446_proteome.fasta	Leptospira_alexanderi_serovar_Manhao_3_str_L_60.fasta	5.85
B_carolinensis_SCW22_proteome.fasta	Leptospira_alexanderi_serovar_Manhao_3_str_L_60.fasta	5.79
B_chilensis_VA1_proteome.fasta	Leptospira_alexanderi_serovar_Manhao_3_str_L_60.fasta	6.11
B_finlandensis_SV1_proteome.fasta	Leptospira_alexanderi_serovar_Manhao_3_str_L_60.fasta	5.55
B_garinii_20047_proteome.fasta	Leptospira_alexanderi_serovar_Manhao_3_str_L_60.fasta	5.62
B_japonica_HO14_proteome.fasta	Leptospira_alexanderi_serovar_Manhao_3_str_L_60.fasta	5.78
B_kurtenbachii_25015_proteome.fasta	Leptospira_alexanderi_serovar_Manhao_3_str_L_60.fasta	5.87
B_lusitaniae_PoTiB2_proteome.fasta	Leptospira_alexanderi_serovar_Manhao_3_str_L_60.fasta	5.97
B_mayonii_MN14-1420_proteome.fasta	Leptospira_alexanderi_serovar_Manhao_3_str_L_60.fasta	5.81
B_spielmanii_A14S_proteome.fasta	Leptospira_alexanderi_serovar_Manhao_3_str_L_60.fasta	5.77
B_valaisiana_VS116_proteome.fasta	Leptospira_alexanderi_serovar_Manhao_3_str_L_60.fasta	5.74
B_yangtzensis_Okinawa_proteome.fasta	Leptospira_alexanderi_serovar_Manhao_3_str_L_60.fasta	5.55
B_afzelii_PKo_proteome.fasta	Leptospira_alstonii.fasta	5.25
B_americana_SCW41_proteome.fasta	Leptospira_alstonii.fasta	5.34
B_bavariensis_PBi_proteome.fasta	Leptospira_alstonii.fasta	5.14
B_bissettiae_DN127_proteome.fasta	Leptospira_alstonii.fasta	5.23
B_burgdorferi_B31_proteome.fasta	Leptospira_alstonii.fasta	5.11
B_californiensis_CA446_proteome.fasta	Leptospira_alstonii.fasta	5.4
B_carolinensis_SCW22_proteome.fasta	Leptospira_alstonii.fasta	5.4
B_chilensis_VA1_proteome.fasta	Leptospira_alstonii.fasta	5.53
B_finlandensis_SV1_proteome.fasta	Leptospira_alstonii.fasta	5.23
B_garinii_20047_proteome.fasta	Leptospira_alstonii.fasta	5.26
B_japonica_HO14_proteome.fasta	Leptospira_alstonii.fasta	5.38
B_kurtenbachii_25015_proteome.fasta	Leptospira_alstonii.fasta	5.52
B_lusitaniae_PoTiB2_proteome.fasta	Leptospira_alstonii.fasta	5.38
B_mayonii_MN14-1420_proteome.fasta	Leptospira_alstonii.fasta	5.4
B_spielmanii_A14S_proteome.fasta	Leptospira_alstonii.fasta	5.39
B_valaisiana_VS116_proteome.fasta	Leptospira_alstonii.fasta	5.27
B_yangtzensis_Okinawa_proteome.fasta	Leptospira_alstonii.fasta	5.16
B_afzelii_PKo_proteome.fasta	Leptospira_biflexa_serovar_Patoc_strain_Patoc_1_Paris.fasta	5.57
B_americana_SCW41_proteome.fasta	Leptospira_biflexa_serovar_Patoc_strain_Patoc_1_Paris.fasta	6
B_bavariensis_PBi_proteome.fasta	Leptospira_biflexa_serovar_Patoc_strain_Patoc_1_Paris.fasta	5.64
B_bissettiae_DN127_proteome.fasta	Leptospira_biflexa_serovar_Patoc_strain_Patoc_1_Paris.fasta	5.58
B_burgdorferi_B31_proteome.fasta	Leptospira_biflexa_serovar_Patoc_strain_Patoc_1_Paris.fasta	5.61
B_californiensis_CA446_proteome.fasta	Leptospira_biflexa_serovar_Patoc_strain_Patoc_1_Paris.fasta	5.75
B_carolinensis_SCW22_proteome.fasta	Leptospira_biflexa_serovar_Patoc_strain_Patoc_1_Paris.fasta	5.75
B_chilensis_VA1_proteome.fasta	Leptospira_biflexa_serovar_Patoc_strain_Patoc_1_Paris.fasta	5.91
B_finlandensis_SV1_proteome.fasta	Leptospira_biflexa_serovar_Patoc_strain_Patoc_1_Paris.fasta	5.58
B_garinii_20047_proteome.fasta	Leptospira_biflexa_serovar_Patoc_strain_Patoc_1_Paris.fasta	5.71
B_japonica_HO14_proteome.fasta	Leptospira_biflexa_serovar_Patoc_strain_Patoc_1_Paris.fasta	5.64
B_kurtenbachii_25015_proteome.fasta	Leptospira_biflexa_serovar_Patoc_strain_Patoc_1_Paris.fasta	5.79
B_lusitaniae_PoTiB2_proteome.fasta	Leptospira_biflexa_serovar_Patoc_strain_Patoc_1_Paris.fasta	5.81
B_mayonii_MN14-1420_proteome.fasta	Leptospira_biflexa_serovar_Patoc_strain_Patoc_1_Paris.fasta	5.79
B_spielmanii_A14S_proteome.fasta	Leptospira_biflexa_serovar_Patoc_strain_Patoc_1_Paris.fasta	5.61
B_valaisiana_VS116_proteome.fasta	Leptospira_biflexa_serovar_Patoc_strain_Patoc_1_Paris.fasta	5.55
B_yangtzensis_Okinawa_proteome.fasta	Leptospira_biflexa_serovar_Patoc_strain_Patoc_1_Paris.fasta	5.5
B_afzelii_PKo_proteome.fasta	Leptospira_borgpetersenii_serovar_Hardjo_bovis_str_L550.fasta	6.42
B_americana_SCW41_proteome.fasta	Leptospira_borgpetersenii_serovar_Hardjo_bovis_str_L550.fasta	6.42
B_bavariensis_PBi_proteome.fasta	Leptospira_borgpetersenii_serovar_Hardjo_bovis_str_L550.fasta	6.16
B_bissettiae_DN127_proteome.fasta	Leptospira_borgpetersenii_serovar_Hardjo_bovis_str_L550.fasta	6.24
B_burgdorferi_B31_proteome.fasta	Leptospira_borgpetersenii_serovar_Hardjo_bovis_str_L550.fasta	6.12
B_californiensis_CA446_proteome.fasta	Leptospira_borgpetersenii_serovar_Hardjo_bovis_str_L550.fasta	6.35
B_carolinensis_SCW22_proteome.fasta	Leptospira_borgpetersenii_serovar_Hardjo_bovis_str_L550.fasta	6.52
B_chilensis_VA1_proteome.fasta	Leptospira_borgpetersenii_serovar_Hardjo_bovis_str_L550.fasta	6.87
B_finlandensis_SV1_proteome.fasta	Leptospira_borgpetersenii_serovar_Hardjo_bovis_str_L550.fasta	6.24
B_garinii_20047_proteome.fasta	Leptospira_borgpetersenii_serovar_Hardjo_bovis_str_L550.fasta	6.39
B_japonica_HO14_proteome.fasta	Leptospira_borgpetersenii_serovar_Hardjo_bovis_str_L550.fasta	6.54
B_kurtenbachii_25015_proteome.fasta	Leptospira_borgpetersenii_serovar_Hardjo_bovis_str_L550.fasta	6.59
B_lusitaniae_PoTiB2_proteome.fasta	Leptospira_borgpetersenii_serovar_Hardjo_bovis_str_L550.fasta	6.78
B_mayonii_MN14-1420_proteome.fasta	Leptospira_borgpetersenii_serovar_Hardjo_bovis_str_L550.fasta	6.63
B_spielmanii_A14S_proteome.fasta	Leptospira_borgpetersenii_serovar_Hardjo_bovis_str_L550.fasta	6.39
B_valaisiana_VS116_proteome.fasta	Leptospira_borgpetersenii_serovar_Hardjo_bovis_str_L550.fasta	6.25
B_yangtzensis_Okinawa_proteome.fasta	Leptospira_borgpetersenii_serovar_Hardjo_bovis_str_L550.fasta	6.25
B_afzelii_PKo_proteome.fasta	Leptospira_broomii_serovar_Hurstbridge_str_5399.fasta	5.28
B_americana_SCW41_proteome.fasta	Leptospira_broomii_serovar_Hurstbridge_str_5399.fasta	5.63
B_bavariensis_PBi_proteome.fasta	Leptospira_broomii_serovar_Hurstbridge_str_5399.fasta	5.32
B_bissettiae_DN127_proteome.fasta	Leptospira_broomii_serovar_Hurstbridge_str_5399.fasta	5.24
B_burgdorferi_B31_proteome.fasta	Leptospira_broomii_serovar_Hurstbridge_str_5399.fasta	5.33
B_californiensis_CA446_proteome.fasta	Leptospira_broomii_serovar_Hurstbridge_str_5399.fasta	5.36
B_carolinensis_SCW22_proteome.fasta	Leptospira_broomii_serovar_Hurstbridge_str_5399.fasta	5.44
B_chilensis_VA1_proteome.fasta	Leptospira_broomii_serovar_Hurstbridge_str_5399.fasta	5.75
B_finlandensis_SV1_proteome.fasta	Leptospira_broomii_serovar_Hurstbridge_str_5399.fasta	5.28
B_garinii_20047_proteome.fasta	Leptospira_broomii_serovar_Hurstbridge_str_5399.fasta	5.48
B_japonica_HO14_proteome.fasta	Leptospira_broomii_serovar_Hurstbridge_str_5399.fasta	5.39
B_kurtenbachii_25015_proteome.fasta	Leptospira_broomii_serovar_Hurstbridge_str_5399.fasta	5.4
B_lusitaniae_PoTiB2_proteome.fasta	Leptospira_broomii_serovar_Hurstbridge_str_5399.fasta	5.66
B_mayonii_MN14-1420_proteome.fasta	Leptospira_broomii_serovar_Hurstbridge_str_5399.fasta	5.29
B_spielmanii_A14S_proteome.fasta	Leptospira_broomii_serovar_Hurstbridge_str_5399.fasta	5.27
B_valaisiana_VS116_proteome.fasta	Leptospira_broomii_serovar_Hurstbridge_str_5399.fasta	5.34
B_yangtzensis_Okinawa_proteome.fasta	Leptospira_broomii_serovar_Hurstbridge_str_5399.fasta	5.38
B_afzelii_PKo_proteome.fasta	Leptospira_fainei_serovar_Hurstbridge_str_BUT_6.fasta	5.38
B_americana_SCW41_proteome.fasta	Leptospira_fainei_serovar_Hurstbridge_str_BUT_6.fasta	5.68
B_bavariensis_PBi_proteome.fasta	Leptospira_fainei_serovar_Hurstbridge_str_BUT_6.fasta	5.38
B_bissettiae_DN127_proteome.fasta	Leptospira_fainei_serovar_Hurstbridge_str_BUT_6.fasta	5.24
B_burgdorferi_B31_proteome.fasta	Leptospira_fainei_serovar_Hurstbridge_str_BUT_6.fasta	5.25
B_californiensis_CA446_proteome.fasta	Leptospira_fainei_serovar_Hurstbridge_str_BUT_6.fasta	5.37
B_carolinensis_SCW22_proteome.fasta	Leptospira_fainei_serovar_Hurstbridge_str_BUT_6.fasta	5.37
B_chilensis_VA1_proteome.fasta	Leptospira_fainei_serovar_Hurstbridge_str_BUT_6.fasta	5.96
B_finlandensis_SV1_proteome.fasta	Leptospira_fainei_serovar_Hurstbridge_str_BUT_6.fasta	5.31
B_garinii_20047_proteome.fasta	Leptospira_fainei_serovar_Hurstbridge_str_BUT_6.fasta	5.57
B_japonica_HO14_proteome.fasta	Leptospira_fainei_serovar_Hurstbridge_str_BUT_6.fasta	5.49
B_kurtenbachii_25015_proteome.fasta	Leptospira_fainei_serovar_Hurstbridge_str_BUT_6.fasta	5.43
B_lusitaniae_PoTiB2_proteome.fasta	Leptospira_fainei_serovar_Hurstbridge_str_BUT_6.fasta	5.8
B_mayonii_MN14-1420_proteome.fasta	Leptospira_fainei_serovar_Hurstbridge_str_BUT_6.fasta	5.39
B_spielmanii_A14S_proteome.fasta	Leptospira_fainei_serovar_Hurstbridge_str_BUT_6.fasta	5.44
B_valaisiana_VS116_proteome.fasta	Leptospira_fainei_serovar_Hurstbridge_str_BUT_6.fasta	5.51
B_yangtzensis_Okinawa_proteome.fasta	Leptospira_fainei_serovar_Hurstbridge_str_BUT_6.fasta	5.5
B_afzelii_PKo_proteome.fasta	Leptospira_inadai_serovar_Lyme.fasta	5.14
B_americana_SCW41_proteome.fasta	Leptospira_inadai_serovar_Lyme.fasta	5.44
B_bavariensis_PBi_proteome.fasta	Leptospira_inadai_serovar_Lyme.fasta	5.18
B_bissettiae_DN127_proteome.fasta	Leptospira_inadai_serovar_Lyme.fasta	5.18
B_burgdorferi_B31_proteome.fasta	Leptospira_inadai_serovar_Lyme.fasta	5.16
B_californiensis_CA446_proteome.fasta	Leptospira_inadai_serovar_Lyme.fasta	5.28
B_carolinensis_SCW22_proteome.fasta	Leptospira_inadai_serovar_Lyme.fasta	5.47
B_chilensis_VA1_proteome.fasta	Leptospira_inadai_serovar_Lyme.fasta	5.65
B_finlandensis_SV1_proteome.fasta	Leptospira_inadai_serovar_Lyme.fasta	5.15
B_garinii_20047_proteome.fasta	Leptospira_inadai_serovar_Lyme.fasta	5.36
B_japonica_HO14_proteome.fasta	Leptospira_inadai_serovar_Lyme.fasta	5.32
B_kurtenbachii_25015_proteome.fasta	Leptospira_inadai_serovar_Lyme.fasta	5.39
B_lusitaniae_PoTiB2_proteome.fasta	Leptospira_inadai_serovar_Lyme.fasta	5.45
B_mayonii_MN14-1420_proteome.fasta	Leptospira_inadai_serovar_Lyme.fasta	5.22
B_spielmanii_A14S_proteome.fasta	Leptospira_inadai_serovar_Lyme.fasta	5.15
B_valaisiana_VS116_proteome.fasta	Leptospira_inadai_serovar_Lyme.fasta	5.41
B_yangtzensis_Okinawa_proteome.fasta	Leptospira_inadai_serovar_Lyme.fasta	5.35
B_afzelii_PKo_proteome.fasta	Leptospira_interrogans_serovar_Lai_str_56601.fasta	5.75
B_americana_SCW41_proteome.fasta	Leptospira_interrogans_serovar_Lai_str_56601.fasta	5.84
B_bavariensis_PBi_proteome.fasta	Leptospira_interrogans_serovar_Lai_str_56601.fasta	5.6
B_bissettiae_DN127_proteome.fasta	Leptospira_interrogans_serovar_Lai_str_56601.fasta	5.45
B_burgdorferi_B31_proteome.fasta	Leptospira_interrogans_serovar_Lai_str_56601.fasta	5.56
B_californiensis_CA446_proteome.fasta	Leptospira_interrogans_serovar_Lai_str_56601.fasta	5.91
B_carolinensis_SCW22_proteome.fasta	Leptospira_interrogans_serovar_Lai_str_56601.fasta	5.74
B_chilensis_VA1_proteome.fasta	Leptospira_interrogans_serovar_Lai_str_56601.fasta	6.07
B_finlandensis_SV1_proteome.fasta	Leptospira_interrogans_serovar_Lai_str_56601.fasta	5.61
B_garinii_20047_proteome.fasta	Leptospira_interrogans_serovar_Lai_str_56601.fasta	5.89
B_japonica_HO14_proteome.fasta	Leptospira_interrogans_serovar_Lai_str_56601.fasta	5.83
B_kurtenbachii_25015_proteome.fasta	Leptospira_interrogans_serovar_Lai_str_56601.fasta	5.94
B_lusitaniae_PoTiB2_proteome.fasta	Leptospira_interrogans_serovar_Lai_str_56601.fasta	5.86
B_mayonii_MN14-1420_proteome.fasta	Leptospira_interrogans_serovar_Lai_str_56601.fasta	5.8
B_spielmanii_A14S_proteome.fasta	Leptospira_interrogans_serovar_Lai_str_56601.fasta	5.74
B_valaisiana_VS116_proteome.fasta	Leptospira_interrogans_serovar_Lai_str_56601.fasta	5.78
B_yangtzensis_Okinawa_proteome.fasta	Leptospira_interrogans_serovar_Lai_str_56601.fasta	5.59
B_afzelii_PKo_proteome.fasta	Leptospira_kirschneri_serovar_Valbuzzi_str_200702274.fasta	5.92
B_americana_SCW41_proteome.fasta	Leptospira_kirschneri_serovar_Valbuzzi_str_200702274.fasta	6.04
B_bavariensis_PBi_proteome.fasta	Leptospira_kirschneri_serovar_Valbuzzi_str_200702274.fasta	5.77
B_bissettiae_DN127_proteome.fasta	Leptospira_kirschneri_serovar_Valbuzzi_str_200702274.fasta	5.69
B_burgdorferi_B31_proteome.fasta	Leptospira_kirschneri_serovar_Valbuzzi_str_200702274.fasta	5.7
B_californiensis_CA446_proteome.fasta	Leptospira_kirschneri_serovar_Valbuzzi_str_200702274.fasta	6.13
B_carolinensis_SCW22_proteome.fasta	Leptospira_kirschneri_serovar_Valbuzzi_str_200702274.fasta	6
B_chilensis_VA1_proteome.fasta	Leptospira_kirschneri_serovar_Valbuzzi_str_200702274.fasta	6.37
B_finlandensis_SV1_proteome.fasta	Leptospira_kirschneri_serovar_Valbuzzi_str_200702274.fasta	5.84
B_garinii_20047_proteome.fasta	Leptospira_kirschneri_serovar_Valbuzzi_str_200702274.fasta	5.85
B_japonica_HO14_proteome.fasta	Leptospira_kirschneri_serovar_Valbuzzi_str_200702274.fasta	5.99
B_kurtenbachii_25015_proteome.fasta	Leptospira_kirschneri_serovar_Valbuzzi_str_200702274.fasta	6.14
B_lusitaniae_PoTiB2_proteome.fasta	Leptospira_kirschneri_serovar_Valbuzzi_str_200702274.fasta	6.18
B_mayonii_MN14-1420_proteome.fasta	Leptospira_kirschneri_serovar_Valbuzzi_str_200702274.fasta	6.08
B_spielmanii_A14S_proteome.fasta	Leptospira_kirschneri_serovar_Valbuzzi_str_200702274.fasta	5.98
B_valaisiana_VS116_proteome.fasta	Leptospira_kirschneri_serovar_Valbuzzi_str_200702274.fasta	5.95
B_yangtzensis_Okinawa_proteome.fasta	Leptospira_kirschneri_serovar_Valbuzzi_str_200702274.fasta	5.9
B_afzelii_PKo_proteome.fasta	Leptospira_kmetyi_serovar_Malaysia_str_Bejo_Iso9.fasta	5.36
B_americana_SCW41_proteome.fasta	Leptospira_kmetyi_serovar_Malaysia_str_Bejo_Iso9.fasta	5.44
B_bavariensis_PBi_proteome.fasta	Leptospira_kmetyi_serovar_Malaysia_str_Bejo_Iso9.fasta	5.28
B_bissettiae_DN127_proteome.fasta	Leptospira_kmetyi_serovar_Malaysia_str_Bejo_Iso9.fasta	5.22
B_burgdorferi_B31_proteome.fasta	Leptospira_kmetyi_serovar_Malaysia_str_Bejo_Iso9.fasta	5.21
B_californiensis_CA446_proteome.fasta	Leptospira_kmetyi_serovar_Malaysia_str_Bejo_Iso9.fasta	5.52
B_carolinensis_SCW22_proteome.fasta	Leptospira_kmetyi_serovar_Malaysia_str_Bejo_Iso9.fasta	5.42
B_chilensis_VA1_proteome.fasta	Leptospira_kmetyi_serovar_Malaysia_str_Bejo_Iso9.fasta	5.83
B_finlandensis_SV1_proteome.fasta	Leptospira_kmetyi_serovar_Malaysia_str_Bejo_Iso9.fasta	5.25
B_garinii_20047_proteome.fasta	Leptospira_kmetyi_serovar_Malaysia_str_Bejo_Iso9.fasta	5.35
B_japonica_HO14_proteome.fasta	Leptospira_kmetyi_serovar_Malaysia_str_Bejo_Iso9.fasta	5.56
B_kurtenbachii_25015_proteome.fasta	Leptospira_kmetyi_serovar_Malaysia_str_Bejo_Iso9.fasta	5.51
B_lusitaniae_PoTiB2_proteome.fasta	Leptospira_kmetyi_serovar_Malaysia_str_Bejo_Iso9.fasta	5.6
B_mayonii_MN14-1420_proteome.fasta	Leptospira_kmetyi_serovar_Malaysia_str_Bejo_Iso9.fasta	5.52
B_spielmanii_A14S_proteome.fasta	Leptospira_kmetyi_serovar_Malaysia_str_Bejo_Iso9.fasta	5.45
B_valaisiana_VS116_proteome.fasta	Leptospira_kmetyi_serovar_Malaysia_str_Bejo_Iso9.fasta	5.48
B_yangtzensis_Okinawa_proteome.fasta	Leptospira_kmetyi_serovar_Malaysia_str_Bejo_Iso9.fasta	5.47
B_afzelii_PKo_proteome.fasta	Leptospira_licerasiae_serovar_Varillal_str_VAR_010.fasta	5.59
B_americana_SCW41_proteome.fasta	Leptospira_licerasiae_serovar_Varillal_str_VAR_010.fasta	5.79
B_bavariensis_PBi_proteome.fasta	Leptospira_licerasiae_serovar_Varillal_str_VAR_010.fasta	5.56
B_bissettiae_DN127_proteome.fasta	Leptospira_licerasiae_serovar_Varillal_str_VAR_010.fasta	5.47
B_burgdorferi_B31_proteome.fasta	Leptospira_licerasiae_serovar_Varillal_str_VAR_010.fasta	5.57
B_californiensis_CA446_proteome.fasta	Leptospira_licerasiae_serovar_Varillal_str_VAR_010.fasta	5.65
B_carolinensis_SCW22_proteome.fasta	Leptospira_licerasiae_serovar_Varillal_str_VAR_010.fasta	5.71
B_chilensis_VA1_proteome.fasta	Leptospira_licerasiae_serovar_Varillal_str_VAR_010.fasta	5.98
B_finlandensis_SV1_proteome.fasta	Leptospira_licerasiae_serovar_Varillal_str_VAR_010.fasta	5.54
B_garinii_20047_proteome.fasta	Leptospira_licerasiae_serovar_Varillal_str_VAR_010.fasta	5.67
B_japonica_HO14_proteome.fasta	Leptospira_licerasiae_serovar_Varillal_str_VAR_010.fasta	5.6
B_kurtenbachii_25015_proteome.fasta	Leptospira_licerasiae_serovar_Varillal_str_VAR_010.fasta	5.82
B_lusitaniae_PoTiB2_proteome.fasta	Leptospira_licerasiae_serovar_Varillal_str_VAR_010.fasta	5.82
B_mayonii_MN14-1420_proteome.fasta	Leptospira_licerasiae_serovar_Varillal_str_VAR_010.fasta	5.73
B_spielmanii_A14S_proteome.fasta	Leptospira_licerasiae_serovar_Varillal_str_VAR_010.fasta	5.69
B_valaisiana_VS116_proteome.fasta	Leptospira_licerasiae_serovar_Varillal_str_VAR_010.fasta	5.8
B_yangtzensis_Okinawa_proteome.fasta	Leptospira_licerasiae_serovar_Varillal_str_VAR_010.fasta	5.93
B_afzelii_PKo_proteome.fasta	Leptospira_mayottensis_200901122.fasta	5.91
B_americana_SCW41_proteome.fasta	Leptospira_mayottensis_200901122.fasta	6.05
B_bavariensis_PBi_proteome.fasta	Leptospira_mayottensis_200901122.fasta	5.88
B_bissettiae_DN127_proteome.fasta	Leptospira_mayottensis_200901122.fasta	5.76
B_burgdorferi_B31_proteome.fasta	Leptospira_mayottensis_200901122.fasta	5.77
B_californiensis_CA446_proteome.fasta	Leptospira_mayottensis_200901122.fasta	6.26
B_carolinensis_SCW22_proteome.fasta	Leptospira_mayottensis_200901122.fasta	5.96
[truncated: 4,973 more rows]

## Sheet: matrix
		1	2	3	4	5	6	7	8	9	10	11	12	13	14	15	16	17	18	19	20	21	22	23	24	25	26	27	28	29	30	31	32	33	34	35	36	37	38	39	40	41	42	43	44	45	46	47	48
Borrelia_afzelii_PKo	1		90.66	76.34	93.12	93.66	93.79	91.49	90.38	83.79	70.05	70.99	73.3	93.1	92.17	76.76	73.69	93.48	93.09	89.86	93.29	70.5	72.85	69.49	7.99	9.2	8.99	8.69	8.54	8.95	9.52	8.48	72.64	94.35	80.31	76.37	80.7	93.29	90.56	5.74	5.25	5.57	6.42	5.28	5.38	5.14	5.75	5.92	5.36
Borrelia_americana_SCW41	2	90.66		80.47	88.28	89.2	91.07	89.44	89.46	87.96	67.11	69.78	71.89	91.45	90.09	75.19	70.1	90.49	89.88	88.76	91.18	78.41	74.59	67.03	8.68	9.66	9.5	9.35	9.04	9.29	10.32	9.21	74.2	88.94	82.22	77.37	80.22	91.45	86.67	5.72	5.34	6	6.42	5.63	5.68	5.44	5.84	6.04	5.44
Borrelia_anserina_BA2	3	76.34	80.47		76.78	75.31	75.63	79.44	78.47	87.17	68.87	75.64	75.69	78.34	78.46	81.31	70.63	81.13	79.92	79.46	78.34	88.55	80.94	70.25	9.82	10.39	10.36	9.64	9.73	9.94	11.04	9.89	83.24	78.92	88.52	79.11	84.63	80.62	76.45	5.95	5.6	6.45	6.79	6.05	6.4	5.95	6.19	6.25	5.85
Borrelia_bavariensis_PBi	4	93.12	88.28	76.78		92.52	91.81	91.99	90.22	84.41	68.58	70.25	73.01	90.81	92.46	76.45	73.44	91.22	92.97	87.69	90.42	73.39	73.69	69.34	8.14	9.16	8.81	8.81	8.38	8.83	9.51	8.47	72.97	90.6	79.13	74.15	80.34	88.65	90.81	5.5	5.14	5.64	6.16	5.32	5.38	5.18	5.6	5.77	5.28
Borrelia_bissettiae_DN127	5	93.66	89.2	75.31	92.52		93.59	92.53	91.06	81.55	70.66	70.34	73.2	92.3	90.84	77.36	73.38	91.57	93.64	88.3	91.55	69.92	73.35	69.62	7.91	8.72	8.64	8.36	8.15	8.51	9.37	8.36	71.92	91.65	79.02	75.64	80.56	90.25	90.46	5.51	5.23	5.58	6.24	5.24	5.24	5.18	5.45	5.69	5.22
Borrelia_burgdorferi_B31	6	93.79	91.07	75.63	91.81	93.59		91	90.46	81.08	70.01	69.9	72.05	92.26	91.35	77.24	72.87	91.63	92.77	88.59	93.36	69.95	73.48	69.54	8.17	9.02	8.8	8.61	8.36	8.72	9.63	8.52	71.55	91.25	79.79	76.24	80.69	91.32	89.01	5.5	5.11	5.61	6.12	5.33	5.25	5.16	5.56	5.7	5.21
Borrelia_californiensis_CA446	7	91.49	89.44	79.44	91.99	92.53	91		92.73	87.04	68.14	71.28	73.34	90.44	90.36	76.85	72.23	91.59	94.06	88.14	90.98	77.73	74.18	69.19	8.3	9.46	9.14	8.83	8.64	9.05	10.02	8.71	75.06	89.51	80.83	75.8	81.24	89.38	89.96	5.85	5.4	5.75	6.35	5.36	5.37	5.28	5.91	6.13	5.52
Borrelia_carolinensis_SCW22	8	90.38	89.46	78.47	90.22	91.06	90.46	92.73		85.62	66.48	69.7	71.46	89.76	89.02	75	70.12	90.01	93.49	86.91	90.93	76.08	72.78	67.39	8.24	9.27	9.15	8.81	8.6	8.95	9.89	8.82	74.03	88.72	79.23	74.35	79.43	88.22	89.06	5.79	5.4	5.75	6.52	5.44	5.37	5.47	5.74	6	5.42
Borrelia_chilensis_VA1	9	83.79	87.96	87.17	84.41	81.55	81.08	87.04	85.62		64.88	71.98	73.49	86.12	86.29	77.55	68.39	88.44	87.54	87.34	86.61	88.81	80.3	66.54	8.88	10.35	9.84	9.61	9.31	9.91	11.03	9.39	79.95	86.82	87.7	78.93	83.64	87.36	83.48	6.11	5.53	5.91	6.87	5.75	5.96	5.65	6.07	6.37	5.83
Borrelia_coriaceae_Co53	10	70.05	67.11	68.87	68.58	70.66	70.01	68.14	66.48	64.88		76.18	80.65	68.04	68.44	85.56	81.31	67.2	69.16	64.79	67.96	65.31	75.86	77.95	7.27	7.98	7.73	7.59	7.47	7.68	8.34	7.4	74.49	66.95	69.97	67.66	84.72	67.41	67.26	5.13	4.78	5.17	5.76	5.12	5.11	5.06	5.41	5.55	5.02
Borrelia_crociduarae_Achema	11	70.99	69.78	75.64	70.25	70.34	69.9	71.28	69.7	71.98	76.18		89.95	70.39	70	82.32	88.02	71.09	71.98	67.97	70.23	75.26	75.99	79.9	8.13	8.87	8.68	8.31	8.27	8.31	9.23	8.31	87.37	70.41	74	68.81	84.25	69.4	68.85	5.35	5.01	5.62	5.91	5.21	5.39	5.08	5.53	5.55	5.29
Borrelia_duttonii_Ly	12	73.3	71.89	75.69	73.01	73.2	72.05	73.34	71.46	73.49	80.65	89.95		72.25	73.37	86.19	93.07	73.25	74.43	70.55	72.01	74.81	79.93	83.55	8.26	9.15	8.94	8.72	8.43	8.52	9.63	8.66	89.29	72.49	75.76	71.27	87.87	71.51	71.39	5.53	5.19	5.83	6.09	5.34	5.46	5.24	5.74	5.92	5.49
Borrelia_finlandensis_SV1	13	93.1	91.45	78.34	90.81	92.3	92.26	90.44	89.76	86.12	68.04	70.39	72.25		90.45	76.22	71.15	92.12	91.43	89.65	94.28	74.45	74.72	67.98	8.16	9.25	8.97	8.89	8.56	8.91	9.95	8.78	73.93	92.71	81.98	77.17	80.25	92.15	88.1	5.55	5.23	5.58	6.24	5.28	5.31	5.15	5.61	5.84	5.25
Borrelia_garinii_20047	14	92.17	90.09	78.46	92.46	90.84	91.35	90.36	89.02	86.29	68.44	70	73.37	90.45		75.76	72.9	91.11	91.59	88.74	90.98	76.19	75.15	68.47	8.57	9.51	9.17	8.9	8.67	9.1	9.83	8.64	73.64	89.41	80.53	75.96	80.6	90.1	89.09	5.62	5.26	5.71	6.39	5.48	5.57	5.36	5.89	5.85	5.35
Borrelia_hermsii_HS1	15	76.76	75.19	81.31	76.45	77.36	77.24	76.85	75	77.55	85.56	82.32	86.19	76.22	75.76		85.7	75.81	77.8	73.74	76.15	79.14	81.9	82.88	8.63	9.84	9.42	9.01	8.95	9.07	9.93	9.02	82.77	75.04	80.15	74.76	89.32	75.04	74.95	5.64	5.15	5.97	6.33	5.52	5.61	5.42	5.82	6.12	5.6
Borrelia_hispanica_CRI	16	73.69	70.1	70.63	73.44	73.38	72.87	72.23	70.12	68.39	81.31	88.02	93.07	71.15	72.9	85.7		71.21	73.61	68.91	71.42	65.98	76.64	84.47	7.67	8.4	8.34	8.15	8.03	8.22	9.06	8.06	83.1	70.91	72.87	69.77	86.89	70.23	71	5.24	4.87	5.51	5.79	5.12	5.28	4.98	5.43	5.5	5.23
Borrelia_japonica_HO14	17	93.48	90.49	81.13	91.22	91.57	91.63	91.59	90.01	88.44	67.2	71.09	73.25	92.12	91.11	75.81	71.21		92.11	89.82	92.78	78.52	74.68	67.7	8.37	9.55	9.28	9.06	8.64	9.1	10.06	8.79	76.15	92.31	82.01	77.01	81.22	91.34	89.9	5.78	5.38	5.64	6.54	5.39	5.49	5.32	5.83	5.99	5.56
Borrelia_kurtenbachii_25015	18	93.09	89.88	79.92	92.97	93.64	92.77	94.06	93.49	87.54	69.16	71.98	74.43	91.43	91.59	77.8	73.61	92.11		88.81	92.86	77.77	75.58	70.02	8.15	9.48	9.27	8.92	8.66	9.04	10.07	8.96	75.91	90.73	81.32	76.77	82.37	90.27	91.23	5.87	5.52	5.79	6.59	5.4	5.43	5.39	5.94	6.14	5.51
Borrelia_lusitaniae_PoTiB2	19	89.86	88.76	79.46	87.69	88.3	88.59	88.14	86.91	87.34	64.79	67.97	70.55	89.65	88.74	73.74	68.91	89.82	88.81		89.05	77.5	73.3	65.15	8.65	9.81	9.48	9.12	8.86	9.3	10.34	9.01	73.08	88.98	80.24	74.88	78.14	89.79	86.05	5.97	5.38	5.81	6.78	5.66	5.8	5.45	5.86	6.18	5.6
Borrelia_mayonii_MN14-1420	20	93.29	91.18	78.34	90.42	91.55	93.36	90.98	90.93	86.61	67.96	70.23	72.01	94.28	90.98	76.15	71.42	92.78	92.86	89.05		75.54	74.16	68.07	8.36	9.3	9.2	8.98	8.6	9.15	10.1	8.77	74.03	92.63	81.42	76.84	80.08	92.14	88.27	5.81	5.4	5.79	6.63	5.29	5.39	5.22	5.8	6.08	5.52
Borrelia_miyamotoi_LB-2001	21	70.5	78.41	88.55	73.39	69.92	69.95	77.73	76.08	88.81	65.31	75.26	74.81	74.45	76.19	79.14	65.98	78.52	77.77	77.5	75.54		84.83	68.19	9.27	10.88	10.43	9.86	9.88	10.09	11.24	10.1	82.93	75.4	87.71	76.43	87.73	77.21	73.97	6.33	5.88	6.39	7.28	6.11	6.25	6.02	6.57	6.76	6.15
Borrelia_parkeri_SLO	22	72.85	74.59	80.94	73.69	73.35	73.48	74.18	72.78	80.3	75.86	75.99	79.93	74.72	75.15	81.9	76.64	74.68	75.58	73.3	74.16	84.83		73.75	8.5	9.42	9.09	8.55	8.54	8.75	10.2	8.8	79.57	73.58	81.24	72.93	90.05	73.57	71.96	5.78	5.25	6.04	6.48	5.88	6.19	5.8	6.14	6.28	5.6
Borrelia_persica_No12	23	69.49	67.03	70.25	69.34	69.62	69.54	69.19	67.39	66.54	77.95	79.9	83.55	67.98	68.47	82.88	84.47	67.7	70.02	65.15	68.07	68.19	73.75		8.04	8.87	8.63	8.41	8.22	8.44	9.36	8.14	78.51	66.87	70.84	67.09	83.89	67.04	68.51	5.13	4.85	5.56	5.69	5.34	5.36	5.14	5.35	5.49	5.06
Brachyspira_alvinipulli_ATCC_51933	24	7.99	8.68	9.82	8.14	7.91	8.17	8.3	8.24	8.88	7.27	8.13	8.26	8.16	8.57	8.63	7.67	8.37	8.15	8.65	8.36	9.27	8.5	8.04		78.84	82.48	80.95	78.41	82.05	74.1	82.02	8.81	8.37	8.87	8.76	8.81	8.4	7.95	8.08	8.29	8.47	8.68	8.39	8.56	8.04	8.94	8.78	8.3
Brachyspira_hampsonii_30446	25	9.2	9.66	10.39	9.16	8.72	9.02	9.46	9.27	10.35	7.98	8.87	9.15	9.25	9.51	9.84	8.4	9.55	9.48	9.81	9.3	10.88	9.42	8.87	78.84		87.12	84.62	84.38	85.34	77.74	86.4	9.81	9.31	10.07	9.7	9.86	9.47	9.17	9.06	8.8	9.3	9.61	8.76	9.09	8.53	9.49	9.66	8.96
Brachyspira_hyodysenteriae_ATCC_27164	26	8.99	9.5	10.36	8.81	8.64	8.8	9.14	9.15	9.84	7.73	8.68	8.94	8.97	9.17	9.42	8.34	9.28	9.27	9.48	9.2	10.43	9.09	8.63	82.48	87.12		83.86	85.63	86.12	79.29	91.21	9.59	9.13	9.66	9.62	9.5	9.26	8.67	8.89	8.74	8.94	9.32	8.66	8.86	8.42	9.59	9.55	8.8
Brachyspira_innocens_ATCC_29796	27	8.69	9.35	9.64	8.81	8.36	8.61	8.83	8.81	9.61	7.59	8.31	8.72	8.89	8.9	9.01	8.15	9.06	8.92	9.12	8.98	9.86	8.55	8.41	80.95	84.62	83.86		83.43	88.88	76.92	83.92	9.13	8.82	9.1	9.19	9.13	9.12	8.5	8.78	8.57	8.8	9.26	8.84	8.98	8.45	9.13	9.27	8.73
Brachyspira_intermedia_PWS_A	28	8.54	9.04	9.73	8.38	8.15	8.36	8.64	8.6	9.31	7.47	8.27	8.43	8.56	8.67	8.95	8.03	8.64	8.66	8.86	8.6	9.88	8.54	8.22	78.41	84.38	85.63	83.43		82.92	76.74	85.74	9	8.66	9.42	9.27	9.08	8.71	8.26	8.63	8.56	8.9	9.09	8.64	8.75	8.32	9.2	9.18	8.65
Brachyspira_murdochii_DSM_12563	29	8.95	9.29	9.94	8.83	8.51	8.72	9.05	8.95	9.91	7.68	8.31	8.52	8.91	9.1	9.07	8.22	9.1	9.04	9.3	9.15	10.09	8.75	8.44	82.05	85.34	86.12	88.88	82.92		79.37	86.14	8.99	9.21	9.41	9.28	9.23	9.22	8.71	8.96	8.68	8.84	9.39	8.87	8.96	8.63	9.44	9.56	8.99
Brachyspira_pilosicoli_P43_6_78	30	9.52	10.32	11.04	9.51	9.37	9.63	10.02	9.89	11.03	8.34	9.23	9.63	9.95	9.83	9.93	9.06	10.06	10.07	10.34	10.1	11.24	10.2	9.36	74.1	77.74	79.29	76.92	76.74	79.37		79	10.49	10.14	10.49	9.98	10.68	9.97	9.52	8.59	8.27	8.42	9.04	8.42	8.55	8.07	8.99	9.13	8.61
Brachyspira_suanatina	31	8.48	9.21	9.89	8.47	8.36	8.52	8.71	8.82	9.39	7.4	8.31	8.66	8.78	8.64	9.02	8.06	8.79	8.96	9.01	8.77	10.1	8.8	8.14	82.02	86.4	91.21	83.92	85.74	86.14	79		9.15	8.7	9.63	9.16	9.34	8.78	8.48	8.69	8.73	8.95	9.32	8.54	8.73	8.2	9.32	9.29	8.54
Borrelia_recurrentis_A1	32	72.64	74.2	83.24	72.97	71.92	71.55	75.06	74.03	79.95	74.49	87.37	89.29	73.93	73.64	82.77	83.1	76.15	75.91	73.08	74.03	82.93	79.57	78.51	8.81	9.81	9.59	9.13	9	8.99	10.49	9.15		74.57	81.58	73.78	86.06	74.27	72.82	5.9	5.38	6.27	6.51	5.69	5.91	5.54	6.14	6.26	5.67
Borrelia_spielmanii_A14S	33	94.35	88.94	78.92	90.6	91.65	91.25	89.51	88.72	86.82	66.95	70.41	72.49	92.71	89.41	75.04	70.91	92.31	90.73	88.98	92.63	75.4	73.58	66.87	8.37	9.31	9.13	8.82	8.66	9.21	10.14	8.7	74.57		81.08	75.83	79.78	92.38	88.41	5.77	5.39	5.61	6.39	5.27	5.44	5.15	5.74	5.98	5.45
Borrelia_tachyglossi_1268-Bc_F10_NS	34	80.31	82.22	88.52	79.13	79.02	79.79	80.83	79.23	87.7	69.97	74	75.76	81.98	80.53	80.15	72.87	82.01	81.32	80.24	81.42	87.71	81.24	70.84	8.87	10.07	9.66	9.1	9.42	9.41	10.49	9.63	81.58	81.08		83.05	85.33	80.93	78.01	5.96	5.5	6.14	6.7	5.77	5.99	5.55	6.17	6.27	5.67
Borrelia_turcica_PB-MS	35	76.37	77.37	79.11	74.15	75.64	76.24	75.8	74.35	78.93	67.66	68.81	71.27	77.17	75.96	74.76	69.77	77.01	76.77	74.88	76.84	76.43	72.93	67.09	8.76	9.7	9.62	9.19	9.27	9.28	9.98	9.16	73.78	75.83	83.05		76.89	76.77	74.28	5.9	5.6	6.3	6.56	5.71	5.87	5.47	6.11	6.35	5.82
Borrelia_turicatae_91E135	36	80.7	80.22	84.63	80.34	80.56	80.69	81.24	79.43	83.64	84.72	84.25	87.87	80.25	80.6	89.32	86.89	81.22	82.37	78.14	80.08	87.73	90.05	83.89	8.81	9.86	9.5	9.13	9.08	9.23	10.68	9.34	86.06	79.78	85.33	76.89		79.46	79.26	6.07	5.43	6.21	6.69	5.91	6.23	5.9	6.2	6.43	5.83
Borrelia_valaisiana_VS116	37	93.29	91.45	80.62	88.65	90.25	91.32	89.38	88.22	87.36	67.41	69.4	71.51	92.15	90.1	75.04	70.23	91.34	90.27	89.79	92.14	77.21	73.57	67.04	8.4	9.47	9.26	9.12	8.71	9.22	9.97	8.78	74.27	92.38	80.93	76.77	79.46		87.44	5.74	5.27	5.55	6.25	5.34	5.51	5.41	5.78	5.95	5.48
Borrelia_yangtzensis_Okinawa	38	90.56	86.67	76.45	90.81	90.46	89.01	89.96	89.06	83.48	67.26	68.85	71.39	88.1	89.09	74.95	71	89.9	91.23	86.05	88.27	73.97	71.96	68.51	7.95	9.17	8.67	8.5	8.26	8.71	9.52	8.48	72.82	88.41	78.01	74.28	79.26	87.44		5.55	5.16	5.5	6.25	5.38	5.5	5.35	5.59	5.9	5.47
Leptospira_alexanderi_serovar_Manhao_3_str_L_60	39	5.74	5.72	5.95	5.5	5.51	5.5	5.85	5.79	6.11	5.13	5.35	5.53	5.55	5.62	5.64	5.24	5.78	5.87	5.97	5.81	6.33	5.78	5.13	8.08	9.06	8.89	8.78	8.63	8.96	8.59	8.69	5.9	5.77	5.96	5.9	6.07	5.74	5.55		68.58	43.91	77.25	59.61	60.76	60.03	76.93	75.72	71.69
Leptospira_alstonii	40	5.25	5.34	5.6	5.14	5.23	5.11	5.4	5.4	5.53	4.78	5.01	5.19	5.23	5.26	5.15	4.87	5.38	5.52	5.38	5.4	5.88	5.25	4.85	8.29	8.8	8.74	8.57	8.56	8.68	8.27	8.73	5.38	5.39	5.5	5.6	5.43	5.27	5.16	68.58		47.65	68.89	66.9	67.49	64.41	73.12	72.34	85.94
Leptospira_biflexa_serovar_Patoc_strain_Patoc_1_Paris	41	5.57	6	6.45	5.64	5.58	5.61	5.75	5.75	5.91	5.17	5.62	5.83	5.58	5.71	5.97	5.51	5.64	5.79	5.81	5.79	6.39	6.04	5.56	8.47	9.3	8.94	8.8	8.9	8.84	8.42	8.95	6.27	5.61	6.14	6.3	6.21	5.55	5.5	43.91	47.65		45.59	46.77	47.63	46.22	45.08	45.29	47.16
Leptospira_borgpetersenii_serovar_Hardjo_bovis_str_L550	42	6.42	6.42	6.79	6.16	6.24	6.12	6.35	6.52	6.87	5.76	5.91	6.09	6.24	6.39	6.33	5.79	6.54	6.59	6.78	6.63	7.28	6.48	5.69	8.68	9.61	9.32	9.26	9.09	9.39	9.04	9.32	6.51	6.39	6.7	6.56	6.69	6.25	6.25	77.25	68.89	45.59		60.72	61.72	59.61	76.8	76.49	71.3
Leptospira_broomii_serovar_Hurstbridge_str_5399	43	5.28	5.63	6.05	5.32	5.24	5.33	5.36	5.44	5.75	5.12	5.21	5.34	5.28	5.48	5.52	5.12	5.39	5.4	5.66	5.29	6.11	5.88	5.34	8.39	8.76	8.66	8.84	8.64	8.87	8.42	8.54	5.69	5.27	5.77	5.71	5.91	5.34	5.38	59.61	66.9	46.77	60.72		91.88	86.39	61.45	61.25	67.52
Leptospira_fainei_serovar_Hurstbridge_str_BUT_6	44	5.38	5.68	6.4	5.38	5.24	5.25	5.37	5.37	5.96	5.11	5.39	5.46	5.31	5.57	5.61	5.28	5.49	5.43	5.8	5.39	6.25	6.19	5.36	8.56	9.09	8.86	8.98	8.75	8.96	8.55	8.73	5.91	5.44	5.99	5.87	6.23	5.51	5.5	60.76	67.49	47.63	61.72	91.88		87.21	62.65	62.75	68.48
Leptospira_inadai_serovar_Lyme	45	5.14	5.44	5.95	5.18	5.18	5.16	5.28	5.47	5.65	5.06	5.08	5.24	5.15	5.36	5.42	4.98	5.32	5.39	5.45	5.22	6.02	5.8	5.14	8.04	8.53	8.42	8.45	8.32	8.63	8.07	8.2	5.54	5.15	5.55	5.47	5.9	5.41	5.35	60.03	64.41	46.22	59.61	86.39	87.21		60.54	59.97	66.19
Leptospira_interrogans_serovar_Lai_str_56601	46	5.75	5.84	6.19	5.6	5.45	5.56	5.91	5.74	6.07	5.41	5.53	5.74	5.61	5.89	5.82	5.43	5.83	5.94	5.86	5.8	6.57	6.14	5.35	8.94	9.49	9.59	9.13	9.2	9.44	8.99	9.32	6.14	5.74	6.17	6.11	6.2	5.78	5.59	76.93	73.12	45.08	76.8	61.45	62.65	60.54		86.74	75.4
Leptospira_kirschneri_serovar_Valbuzzi_str_200702274	47	5.92	6.04	6.25	5.77	5.69	5.7	6.13	6	6.37	5.55	5.55	5.92	5.84	5.85	6.12	5.5	5.99	6.14	6.18	6.08	6.76	6.28	5.49	8.78	9.66	9.55	9.27	9.18	9.56	9.13	9.29	6.26	5.98	6.27	6.35	6.43	5.95	5.9	75.72	72.34	45.29	76.49	61.25	62.75	59.97	86.74		74.66
Leptospira_kmetyi_serovar_Malaysia_str_Bejo_Iso9	48	5.36	5.44	5.85	5.28	5.22	5.21	5.52	5.42	5.83	5.02	5.29	5.49	5.25	5.35	5.6	5.23	5.56	5.51	5.6	5.52	6.15	5.6	5.06	8.3	8.96	8.8	8.73	8.65	8.99	8.61	8.54	5.67	5.45	5.67	5.82	5.83	5.48	5.47	71.69	85.94	47.16	71.3	67.52	68.48	66.19	75.4	74.66
Leptospira_licerasiae_serovar_Varillal_str_VAR_010	49	5.59	5.79	6.26	5.56	5.47	5.57	5.65	5.71	5.98	5.11	5.41	5.58	5.54	5.67	5.69	5.39	5.6	5.82	5.82	5.73	6.25	6.02	5.18	8.59	9.32	9.11	9.03	8.92	9.24	8.61	8.96	5.89	5.69	6.12	5.85	5.99	5.8	5.93	60.92	68.34	49.07	61.1	77.48	78.01	75.67	61.76	62.04	69.57
Leptospira_mayottensis_200901122	50	5.91	6.05	6.34	5.88	5.76	5.77	6.26	5.96	6.27	5.4	5.54	5.75	5.91	6.01	6.14	5.52	6.06	6.26	6.32	6.04	6.77	6.16	5.58	8.62	9.41	8.94	9.01	8.74	9.36	8.75	8.96	6.14	6.07	6.41	6.17	6.29	5.96	5.88	80.28	70.49	45.62	81.18	60.29	61.39	60.39	79.7	79.14	73.63
Leptospira_meyeri_serovar_Hardjo_str_Went_5	51	5.38	5.6	5.99	5.48	5.32	5.41	5.56	5.43	5.85	5.05	5.22	5.46	5.5	5.55	5.51	5.16	5.51	5.6	5.69	5.58	6.07	5.69	5.13	8.3	9.15	8.73	8.44	8.54	8.63	8.37	8.55	5.8	5.43	5.84	5.92	5.96	5.39	5.29	43.13	47.42	85.41	44.51	46.76	47.46	45.41	44.64	44.86	47.7
Leptospira_noguchii_serovar_Panama_str_CZ214	52	5.64	5.72	5.77	5.63	5.42	5.33	5.8	5.8	6.26	5.22	5.46	5.64	5.5	5.68	5.78	5.32	5.83	5.86	5.83	5.82	6.52	5.98	5.17	8.67	9.12	9.08	9.01	8.72	9.07	8.65	8.84	5.91	5.53	5.99	5.94	6.22	5.76	5.45	77.35	71.89	44.64	75.83	60.74	61.68	59.6	85.41	85.96	73.95
Leptospira_santarosai_serovar_Shermani_str_LT_821	53	5.86	6.06	6.22	5.73	5.74	5.74	6	5.93	6.26	5.4	5.51	5.69	5.8	5.83	5.99	5.45	5.86	6.03	6.14	5.87	6.63	6.1	5.59	8.26	8.97	9.11	8.93	8.83	8.78	8.39	8.75	5.98	5.98	6.24	6.12	6.24	5.95	5.78	77.29	70.03	44.65	77.1	59.8	60.77	58.54	78.28	77.01	71.76
Leptospira_terpstrae_serovar_Hualin_str_LT_11_33	54	5.25	5.49	6.14	5.56	5.4	5.33	5.56	5.44	5.76	4.96	5.38	5.57	5.33	5.54	5.6	5.27	5.58	5.67	5.71	5.5	6.18	5.64	5.26	8.67	9.36	9.14	8.98	8.64	9.13	8.4	8.89	5.94	5.42	5.86	5.98	5.76	5.4	5.27	44.12	49.01	86.47	45.27	47.54	48.66	45.99	45.3	45.41	48.53
Leptospira_vanthielii_serovar_Holland_str_Waz_Holland	55	5.16	5.45	6.04	5.37	5.21	5.19	5.39	5.41	5.54	4.89	5.05	5.26	5.22	5.4	5.61	5.2	5.42	5.47	5.52	5.38	6.02	5.56	5.1	8.41	9.23	8.84	8.79	8.66	9	8.51	8.63	5.57	5.34	5.75	5.58	5.75	5.22	5.16	44.11	47.84	84.28	44.76	46.68	47.68	46.3	45.4	44.6	47.41
Leptospira_weilii_serovar_Topaz_str_LT2116	56	5.63	5.7	6.11	5.49	5.6	5.44	5.81	5.81	6.12	5.16	5.37	5.51	5.54	5.7	5.74	5.19	5.84	5.85	6.04	5.85	6.38	5.78	5.2	8.05	8.89	8.75	8.61	8.42	8.73	8.72	8.46	6.06	5.79	5.95	6.03	5.9	5.76	5.51	77.72	64.51	41.19	73.92	55.33	56.76	55.87	71.9	71.29	66.32
Leptospira_wolbachii_serovar_Codice_str_CDC	57	5.3	5.42	6.13	5.42	5.23	5.37	5.44	5.39	5.81	5.08	5.38	5.55	5.36	5.49	5.59	5.29	5.43	5.52	5.68	5.53	6.22	5.72	5.27	8.44	9.24	8.93	8.68	8.69	9.03	8.59	8.64	5.91	5.47	5.79	5.81	5.77	5.26	5.12	44.06	48.42	85.85	45.25	46.7	47.84	46.74	45.6	45.24	48.22
Leptospira_wolffii_serovar_Khorat_str_Khorat_H2	58	5.25	5.39	6.03	5.21	5.07	5.18	5.31	5.22	5.78	5.01	5.1	5.28	5.16	5.3	5.53	5.13	5.42	5.41	5.45	5.36	6.05	5.65	5.24	8.38	8.95	8.92	8.65	8.66	8.76	8.62	8.82	5.58	5.25	5.69	5.72	5.66	5.32	5.22	58.48	66.15	47.08	59.8	75.97	76.73	73.34	60.35	59.96	66.42
Leptospira_yanagawae_serovar_Saopaulo_str_Sao_Paulo	59	5.58	5.91	6.42	5.45	5.56	5.52	5.78	5.64	5.9	5.01	5.59	5.66	5.68	5.66	5.82	5.49	5.57	5.86	5.63	5.76	6.29	5.86	5.41	8.32	9.02	8.81	8.75	8.59	8.82	8.45	8.49	6.14	5.65	5.93	5.87	5.83	5.62	5.41	43.91	46.39	87.08	45.23	45.72	46.55	45.22	45.04	45.1	46.42
Spirochaeta_africana_DSM_8902	60	13.16	13.73	15.05	13.25	12.96	12.83	13.68	13.62	14.58	11.49	12.27	12.76	13.48	13.31	13.29	12.13	13.3	13.82	13.81	13.6	14.98	13.48	12.28	9.7	10.39	10.46	10.29	10.18	10.3	10.45	10.38	13.7	13.48	14.28	13.44	13.89	13.73	13.29	8.77	8.81	9.78	9.66	9.14	9.45	9.08	9.17	9.32	9.11
Spirochaeta_americana_ASpG1	61	12.25	12.77	14.3	12.25	11.97	12.21	12.69	12.45	13.46	11.11	11.76	12.35	12.4	12.51	12.78	11.22	12.54	12.76	13.02	12.57	13.83	13.17	11.96	10.49	11.75	10.82	11.39	10.89	11.17	10.93	11.05	13.31	12.64	13.45	13.12	13.52	12.52	12.41	8.97	8.74	9.95	9.17	9.11	9.05	9.13	9.11	8.97	8.86
Spirochaeta_cellobiosiphila_DSM_17781	62	12.66	13.06	14.47	12.83	12.54	12.44	13.23	13.08	14.1	11.63	11.98	12.55	12.77	13.1	13.25	11.78	13.23	13.14	13.23	13.04	14.57	13.14	11.97	11.26	11.57	11.45	11.4	11	11.23	11.21	11.37	13.39	12.91	14.01	13.27	13.67	13.05	12.79	9.03	9.17	9.79	9.66	9.26	9.57	9	9.47	9.62	9.46
Spirochaeta_lutea	63	12.29	13.19	14.86	12.72	12.36	12.62	13.21	12.87	13.95	12.04	12.39	12.91	12.91	13.11	13.52	12.04	13.02	13.13	13.41	13.09	14.64	13.62	12.57	10.35	10.91	10.88	10.99	10.63	10.66	10.76	10.72	13.82	12.79	14.26	13.55	14.08	12.95	12.61	9.59	9.53	10.05	10.01	9.58	9.69	9.43	9.73	9.77	9.51
Spirochaeta_thermophila_DSM_6578	64	14.09	15.09	17	14.63	14	14.11	15.2	15	16.4	13.17	14.13	14.44	14.79	15	15.59	13.44	15.13	15.33	15.6	15.05	17.25	15.79	13.77	12.06	12.93	12.55	12.85	12.56	12.79	13.29	12.52	16.03	14.67	16.41	15.72	15.87	14.98	14.61	9.56	9.6	10.71	10.46	10.35	10.49	10.04	9.76	10.2	10.16
Treponema_azotonutricium_ZAS_9	65	10.54	11.19	12.61	10.88	10.86	10.85	11.23	11.1	11.79	9.92	10.49	10.75	11.05	11.11	11.42	10.28	11.09	11.47	11.37	11.32	12.3	11.46	10.41	12.76	12.82	12.67	12.9	12.65	12.75	12.41	12.4	11.55	11.05	11.98	11.57	11.8	11.12	11.04	7.76	7.83	8.34	8.11	8.28	8.36	7.94	7.9	7.88	8.09
Treponema_berlinense_ATCC_BAA_909	66	12.79	13.75	15.29	13.3	12.99	13.06	13.72	13.44	15.08	12.12	12.34	12.59	13.63	13.67	13.64	11.4	13.82	13.58	13.88	13.5	15.56	13.96	11.76	12.69	13.38	13.44	13.15	12.78	13.5	13.18	13.21	13.89	13.34	14.66	13.67	14.49	13.6	13.22	8.64	7.94	8.42	8.84	8.43	8.65	7.87	8.64	8.61	8.13
Treponema_brennaborense_DSM_12168	67	11.73	12.71	14.03	11.94	11.76	11.93	12.71	12.25	13.53	10.72	11.7	11.93	12.2	12.58	12.34	11.14	12.45	12.57	12.79	12.43	13.6	12.52	11.57	12.6	13.61	13.12	12.88	13.05	13.16	13.4	12.86	12.89	12.13	13.57	12.85	12.88	12.43	12.02	7.7	7.48	7.89	8.16	7.68	7.9	7.51	7.91	7.87	8.09
Treponema_bryantii_NK4A124	68	10.7	11.02	12.65	10.88	10.53	10.63	11.1	10.93	11.77	10.16	10.37	10.66	10.8	11.06	11.09	9.94	11.37	11.17	11.35	11.2	12.52	11.29	10.27	11.36	11.66	11.58	11.38	11.25	11.55	11.33	11.16	11.43	11.09	11.55	11.46	11.53	11.15	10.62	7.08	6.73	7.13	7.39	7.03	7.26	7.06	7.08	7.17	6.95
Treponema_caldarium_DSM_7334	69	13.25	13.77	15.44	13.64	13.1	13.23	14.1	13.69	14.81	12.17	12.92	13.32	13.52	13.88	13.83	12.3	14.03	13.86	14.6	13.88	15.31	14.21	12.66	13.3	13.99	13.6	13.83	13.35	13.73	13.58	13.42	14.34	13.77	14.89	14.12	14.31	14.09	13.57	9.7	9.37	9.74	10.09	9.4	9.66	9.34	9.85	9.81	9.51
Treponema_denticola_ATCC_35405	70	11.83	12.68	13.75	11.96	11.86	11.9	12.53	12.11	13.42	11.08	11.74	12.07	12.28	12.35	12.42	11.19	12.24	12.44	12.64	12.48	14.02	12.71	11.56	11.4	11.9	11.82	11.8	11.11	11.77	11.73	11.34	13.15	12.27	13.44	12.74	13.12	12.56	11.95	7.23	6.57	7.77	7.68	7.18	7.17	7.01	7.18	7.19	6.56
Treponema_lecithinolyticum_ATCC_700332	71	14.26	15.27	16.89	14.29	13.58	14.3	14.73	14.24	16.1	12.45	13.24	13.87	14.61	14.73	14.58	12.36	14.84	14.65	14.98	14.73	16.35	15.07	13.2	12.51	13.42	13.03	12.83	12.85	12.85	13.71	12.78	15.07	14.75	16.46	14.78	15.59	14.78	14.12	7.42	7.14	8.21	7.9	7.34	7.5	7.14	7.43	7.49	7.28
Treponema_maltophilum_ATCC_51939	72	13.19	14.12	15.46	13.44	13.22	13.17	14.02	14.01	15.17	12.13	12.3	12.8	13.68	13.92	14.05	11.9	13.92	13.98	14.04	13.78	15.77	14.31	12.41	12.26	13.04	12.88	12.97	12.67	12.81	13.3	12.81	13.93	13.48	14.49	13.97	14.78	13.79	13.43	8.27	7.38	8.67	8.03	7.68	7.99	7.97	7.76	7.73	7.4
Treponema_medium_ATCC_700293	73	13.11	14.23	16.06	13.61	13.32	13.53	14.25	13.69	15.29	12.03	12.54	13.01	13.7	13.89	14.13	11.81	14	14.15	14.13	13.89	15.63	14.24	12.56	11.91	13.25	13.13	13.35	12.75	13.18	13.39	12.97	14.22	13.97	15.07	14.14	14.8	14.07	13.7	7.31	6.73	7.84	7.34	7.27	7.53	7.35	7.02	6.78	7
Treponema_pallidum_subsp_pallidum_str_Sea_81_4	74	14.82	16.93	18.9	15.34	14.38	15.19	16.24	15.8	18.51	13.48	15.25	15.03	15.87	16.27	16.34	13.36	16.19	16.45	16.96	16.12	19.5	17.91	13.51	8.66	9.71	9.39	9.15	9.04	9.34	9.98	9.26	17.34	15.97	18.28	16.66	17.96	16.15	15.27	6.55	6.23	6.58	7.35	6.42	6.4	6.15	6.72	6.9	6.53
Treponema_paraluiscuniculi_Cuniculi_A	75	15.26	17.27	19.14	15.85	14.78	15.59	16.63	16.05	18.94	13.48	15.45	15.22	16.47	16.65	16.53	13.54	16.67	16.88	17.5	16.41	19.77	18.02	13.8	8.78	9.98	9.55	9.25	9.28	9.35	10.09	9.43	17.58	16.35	18.48	16.99	17.97	16.62	15.56	6.6	6.21	6.67	7.29	6.38	6.44	6.17	6.74	6.95	6.65
Treponema_pedis_str_T_A4	76	13.2	13.61	15.39	13.2	13.22	13.42	13.98	13.92	15.2	11.83	12.2	12.4	13.66	13.67	13.77	11.74	14.05	14.36	14.31	14.11	15.22	13.44	12.29	12.32	12.41	12.78	12.74	11.82	13.03	12.72	12.04	13.45	14.04	14.45	13.94	14.19	14.03	13.53	7.14	7	7.89	7.38	7.35	7.35	7.13	7.56	7.31	7.18
Treponema_phagedenis_4A	77	12.67	13.76	14.96	12.98	12.67	13.05	13.6	13.49	14.56	11.63	12.4	12.93	13.27	13.45	13.74	12.01	13.07	13.82	13.71	13.38	14.65	13.78	11.92	13.08	14.08	13.76	14.11	13.62	13.83	13.97	13.76	13.88	13.24	14.22	13.41	14.27	13.34	13.12	7.25	7	7.5	7.95	7.37	7.4	7	7.63	7.67	7.31
Treponema_porcinum	78	12.66	13.55	15.07	13.02	12.53	12.7	13.43	13.27	14.72	11.64	11.94	12.38	13.03	13.38	12.87	11.32	13.31	13.23	13.46	13.36	14.62	13.53	11.93	11.99	12.7	12.69	12.34	12.21	12.63	12.38	12.48	13.36	13.17	14.79	13.77	13.73	13.63	12.89	7.87	7.56	8.24	8.2	7.84	8.13	7.75	8.23	8.14	7.59
Treponema_primitia_ZAS_2	79	10.89	11.39	12.56	11.13	10.84	10.83	11.22	11.12	12.2	9.96	10.06	10.5	11.27	11.29	11.51	10.04	11.26	11.37	11.48	11.37	12.24	11.24	10.4	12.43	13.2	13	12.78	12.58	13.07	12.94	12.65	11.36	11.28	11.95	11.64	11.57	11.33	11.18	9.06	8.55	9.16	9.06	9.05	9.19	8.9	8.66	8.67	8.79
Treponema_putidum_strain_OMZ_758	80	13.11	13.85	15.16	13.24	12.92	13.28	13.88	13.58	14.94	12	12.6	13.17	13.9	13.8	13.6	12.2	13.77	13.66	13.95	13.84	15.4	13.97	12.31	12.7	12.64	12.9	12.73	12.18	12.77	12.53	12.39	14.36	13.57	14.82	13.88	14.36	13.93	13.25	7.85	7.1	8.21	7.91	7.69	7.85	7.73	7.56	7.53	7.3
Treponema_saccharophilum_DSM_2985	81	9.98	10.55	11.7	10.4	9.84	9.95	10.51	10.4	11.33	9.62	10.1	10.46	10.08	10.48	10.79	9.54	10.47	10.53	10.5	10.47	11.63	10.86	9.86	11.66	12.27	12.6	11.94	11.62	12.13	11.87	12.05	11.39	10.21	11.53	10.81	11.28	10.47	10.02	7.53	7.4	7.84	7.82	7.71	7.82	7.44	7.6	7.69	7.69
Treponema_socranskii_subsp_paredis_ATCC_35535	82	12.02	12.62	14.2	12.33	11.92	11.97	12.65	12.38	13.83	11.17	11.55	11.89	12.36	12.64	12.88	11.03	12.71	12.75	13.09	12.47	14.25	12.79	11.78	12.49	13.49	13.21	13.15	12.53	13.27	12.75	12.68	12.69	12.67	13.72	12.96	13.02	12.82	12.39	8.11	7.14	7.9	8.15	7.69	7.9	7.61	7.7	7.9	7.56
Treponema_succinifaciens_DSM_2489	83	11.79	12.59	13.57	12.1	11.8	11.94	12.75	12.29	12.93	10.92	11.09	11.57	12.34	12.45	12.3	10.81	12.24	12.53	12.2	12.49	13.34	12.75	11.21	11.5	11.95	11.96	11.92	11.6	11.82	11.69	11.79	12.44	11.88	13.08	12.86	13.05	12.13	12.16	7.72	7.18	7.52	7.89	7.6	7.79	7.39	7.72	7.63	7.27
Treponema_vincentii_F0403	84	13.06	13.88	15.75	13.58	13.22	13.29	13.9	13.8	15.26	11.9	12.69	13.07	13.7	13.91	14.04	12.03	13.76	14.06	14.12	13.72	15.59	14.35	12.45	12.62	13.48	13.38	13.69	13.34	13.28	13.23	13.1	14.35	13.79	14.62	14.19	14.75	14.09	13.56	7.12	6.62	7.51	7.45	7.17	7.44	7.25	6.92	6.69	6.87
[truncated: 36 more columns]
